# Supplementary material for: Differentially Expressed Genes and Signalling Pathways Regulated by High Selenium Involved in Antioxidant and Immune Functions of Goats Based on Transcriptome Sequencing
Source: MDPI journal article supplement (doi:10.3390/ijms24021124), 2023-01-06
Supplement: s1 [file s1]

**Table S8.** Information for candidate genes used for real-time PCR in this study.

| Gene            | Primer sequences (5' to 3')   | Accession number | Product size, nt | Annealing temperature, °C |
|-----------------|-------------------------------|------------------|------------------|---------------------------|
| <i>SEPWI</i>    | (F) TGGACACGGAGAGCAAGTTT      | XM_005709381.3   | 94               | 60                        |
|                 | (R) CGGTIACTGGTCTCTGCCTT      |                  |                  |                           |
| <i>GPXI</i>     | (F) GCATCGCTCTGAGGCACAAC      | XM_005695962.3   | 134              | 60                        |
|                 | (R) TCGTTCTTGGCATTTCCTGA      |                  |                  |                           |
| <i>GSTA1</i>    | (F) CCGCCAAACACAACCTCTAC      | NM_001314321.1   | 79               | 60                        |
|                 | (R) AAATCTGCCACACCCTCTGA      |                  |                  |                           |
| <i>TNF</i>      | (F) TTCAGACACTCAGGTCATCTTCTCA | NM_001286442.1   | 118              | 60                        |
|                 | (R) TTGAGGGCATTGGCATAACGA     |                  |                  |                           |
| <i>TNFSF10</i>  | (F) ATGGCTTGGGTTGCTTCTTG      | XM_005675308.3   | 85               | 60                        |
|                 | (R) AGTTCCCAGCAGGGATTGAT      |                  |                  |                           |
| <i>TNFSF8</i>   | (F) GGTGATCCAGTTCCCAGGTT      | XM_005684351.3   | 154              | 60                        |
|                 | (R) TTGTGCTCCAGACTCACACA      |                  |                  |                           |
| <i>TNFSF13B</i> | (F) GGACGAACTGAGTCTGGTGA      | NM_001285702.1   | 122              | 60                        |
|                 | (R) CCAGTTGGAGTTCGTCTCCT      |                  |                  |                           |
| <i>GAPDH</i>    | (F) GCCCTCTCAAGGGCATTCTA      | XM_005680968.3   | 81               | 60                        |
|                 | (R) AGGTAGAAGAGTGAGTGTCGC     |                  |                  |                           |

*SEPWI*, selenoprotein W, 1; *GPXI*, glutathione peroxidase 1; *GSTA1*, glutathione S-transferase A1; *TNF*, tumor necrosis factor; *TNFSF10*, tumor necrosis factor superfamily member 10; *TNFSF8*, tumor necrosis factor superfamily member 8; *TNFSF13B*, tumor necrosis factor superfamily member 13b; *GAPDH*, glyceraldehyde-3-phosphate dehydrogenase.
