# Supplementary material for: Differentially Expressed Genes and Signalling Pathways Regulated by High Selenium Involved in Antioxidant and Immune Functions of Goats Based on Transcriptome Sequencing
Source: MDPI journal article supplement (doi:10.3390/ijms24021124), 2023-01-06
Supplement: s1 [file s1]

**Table S1.** Ingredients and nutrient composition of basal diets (DM basis)

| Ingredients (% of fed basis)   | Content |
|--------------------------------|---------|
| Peanut vines                   | 50.00   |
| White distiller's grains       | 10.00   |
| Soybean residues               | 10.00   |
| Green hay                      | 9.30    |
| Corn                           | 16.00   |
| Soybean meal                   | 3.00    |
| Premix                         | 1.00    |
| Salt                           | 0.50    |
| Limestone                      | 0.20    |
| Total                          | 100.00  |
| Chemical composition (% of DM) |         |
| Dry matter, %                  | 90.15   |
| Crude protein                  | 11.95   |
| Neutral detergent fiber        | 42.74   |
| Acid detergent fiber           | 28.61   |
| Ether extract                  | 2.35    |
| Ash                            | 8.72    |

Premix contained per kilogram feed: vitamin A was 4000000 IU, vitamin D was 600000 IU, vitamin E was 25000 mg, DL-methionine was 7000 mg, L-lysine was 5000 mg, Cu was 1300 mg, Fe was 1000 mg, Zn was 1575 mg, and Mn was 595 mg.
