# Supplementary material for: Differentially Expressed Genes and Signalling Pathways Regulated by High Selenium Involved in Antioxidant and Immune Functions of Goats Based on Transcriptome Sequencing
Source: Int J Mol Sci. 2023 Jan 6;24(2):1124. doi: 10.3390/ijms24021124 (PMC9864924; doi:10.3390/ijms24021124)
Supplement: Supplementary file 1 [file ijms-24-01124-s001.zip]

Archive with 8 entries (8 files):
- Table S1. Ingredients and nutrient composition of basal diets (DM basis).pdf
- Table S2. Transcriptome sequencing data.xlsx
- Table S3. Differentially expression genes for the transcriptome sequencing.xlsx
- Table S4. The Kyoto Encyclopedia of Genes and Genomes pathway enrichment.xlsx
- Table S5. The upregulated differentially expression genes were enriched in KEGG pathways.xlsx
- Table S6. The downregulated differentially expression genes were enriched in KEGG pathways.xlsx
- Table S7. The gene ontology enrichment analysis.xlsx
- Table S8. Information for candidate genes used for real-time PCR in this study.pdf
