# Supplementary material for: Differentially Expressed Genes and Signalling Pathways Regulated by High Selenium Involved in Antioxidant and Immune Functions of Goats Based on Transcriptome Sequencing
Source: Int J Mol Sci. 2023 Jan 6;24(2):1124. doi: 10.3390/ijms24021124 (PMC9864924; doi:10.3390/ijms24021124)
Supplement: Supplementary file 1 [file ijms-24-01124-s001.zip › Table S2. Transcriptome sequencing data.xlsx]

## Sheet: Sheet1
Table S1. Transcriptome sequencing data
Sample	Raw reads	Raw bases (GB)	Clean reads	Clean bases (GB)	Error rate(%)	Q20(%)	Q30(%)	GC content(%)	Total reads	Total mapped	Multiple mapped	Uniquely mapped
CON1	50932880	7.16268	50445484	6.96601	0.024	98.37	95.16	52.72	50445484	48403317(95.95%)	5235231(10.38%)	43168086(85.57%)
CON2	49717586	6.99177	49266040	6.80913	0.024	98.39	95.25	53.13	49266040	47385545(96.18%)	4185768(8.5%)	43199777(87.69%)
CON3	50186700	7.05774	49726992	6.86398	0.0239	98.42	95.33	52.89	49726992	47819635(96.16%)	4445582(8.94%)	43374053(87.22%)
CON4	49955230	7.02519	49523358	6.84832	0.0242	98.3	94.96	52.18	49523358	47480318(95.87%)	4347475(8.78%)	43132843(87.1%)
CON5	45249380	6.36341	44861062	6.20157	0.0241	98.36	95.12	53.11	44861062	43204872(96.31%)	3891717(8.68%)	39313155(87.63%)
CON6	45790398	6.43949	45434310	6.28496	0.024	98.41	95.22	51.38	45434310	43581448(95.92%)	4668740(10.28%)	38912708(85.65%)
HS1	50780186	7.1412	50285598	6.95829	0.024	98.37	95.19	53.27	50285598	48418008(96.29%)	4263634(8.48%)	44154374(87.81%)
HS2	43403096	6.10376	42900438	5.95572	0.0243	98.26	94.9	52.96	42900438	41486376(96.7%)	3959254(9.23%)	37527122(87.47%)
HS3	49404764	6.94778	48947336	6.76397	0.0242	98.3	95.04	53.32	48947336	47078487(96.18%)	3486293(7.12%)	43592194(89.06%)
HS4	51792756	7.2836	51302648	7.09764	0.024	98.39	95.19	52.45	51302648	49489948(96.47%)	5169847(10.08%)	44320101(86.39%)
HS5	42647520	5.99751	42241646	5.84186	0.024	98.38	95.22	53.45	42241646	40632991(96.19%)	3569292(8.45%)	37063699(87.74%)
HS6	48342686	6.79842	47882572	6.63262	0.0241	98.33	95.05	53.28	47882572	46115809(96.31%)	4055313(8.47%)	42060496(87.84%)
Total	578203182	81.3125	572817484	79.2241	0.2888	1180.28	1141.63	634.14	572817484
SD	3.10697e+06	0.436933	3.08493e+06	0.422206	0.00011547	0.0490516	0.12602	0.594543	3.08493e+06
SEM	896906	0.126132	890543	0.12188	3.33333e-05	0.01416	0.0363789	0.17163	890543
