# Supplementary material for: Differentially Expressed Genes and Signalling Pathways Regulated by High Selenium Involved in Antioxidant and Immune Functions of Goats Based on Transcriptome Sequencing
Source: Int J Mol Sci. 2023 Jan 6;24(2):1124. doi: 10.3390/ijms24021124 (PMC9864924; doi:10.3390/ijms24021124)
Supplement: Supplementary file 1 [file ijms-24-01124-s001.zip › Table S3. Differentially expression genes for the transcriptome sequencing.xlsx]

## Sheet: Sheet1
Table S2. Differentially expression genes for the transcriptome sequencing
Gene_id	Gene name	Gene description	FC(HS/CON)	Log2FC(HS/CON)	Pvalue	Padjust	Significant	Regulate	CON	HS
ENSCHIG00000015893	PLEKHM1	pleckstrin homology and RUN domain containing M1 [Source:NCBI gene;Acc:102168577]	7.5073e+06	22.8399	2.89588e-14	1.37265e-10	yes	up	0	0.581667
ENSCHIG00000023167	JMJD7	jmjC domain-containing protein 7 [Source:NCBI gene;Acc:102175216]	374.786	8.54992	0.0044265	0.036196	yes	up	0	4.545
ENSCHIG00000018156		-	8.818	3.1405	2.69694e-05	0.00144719	yes	up	0.7	5.22667
ENSCHIG00000013143		actin, alpha 1, skeletal muscle [Source:NCBI gene;Acc:102182476]	7.945	2.99003	0.00181352	0.0206969	yes	up	22.745	168.658
ENSCHIG00000026123	GAL3ST4	galactose-3-O-sulfotransferase 4 [Source:NCBI gene;Acc:102183752]	6.814	2.76852	0.00130152	0.0166586	yes	up	0.501667	3.39
ENSCHIG00000019438		tubulin alpha-1D chain [Source:NCBI gene;Acc:102178119]	6.124	2.61453	0.00130517	0.0166902	yes	up	7.33833	35.1633
ENSCHIG00000005368		-	5.278	2.40001	0.00293862	0.0280828	yes	up	0.23	1.06
ENSCHIG00000002559	SRPK3	SRSF protein kinase 3 [Source:NCBI gene;Acc:102191409]	4.645	2.21557	0.000434338	0.00826543	yes	up	0.515	2.26333
ENSCHIG00000013843	STARD10	StAR related lipid transfer domain containing 10 [Source:NCBI gene;Acc:102179793]	4.592	2.19902	0.000589721	0.00994761	yes	up	0.983333	3.13667
ENSCHIG00000022860	SEPW1	selenoprotein W [Source:NCBI gene;Acc:102180529]	4.503	2.17098	1.89553e-24	2.69544e-20	yes	up	181.56	697.93
ENSCHIG00000014714	KIAA2012	KIAA2012 ortholog [Source:NCBI gene;Acc:102173696]	4.21	2.07368	0.00697645	0.0479505	yes	up	0.0633333	0.211667
ENSCHIG00000005128	HS3ST2	heparan sulfate-glucosamine 3-sulfotransferase 2 [Source:NCBI gene;Acc:102183286]	4.124	2.04394	0.00299238	0.0283571	yes	up	0.69	2.675
ENSCHIG00000000440	ATP2B3	ATPase plasma membrane Ca2+ transporting 3 [Source:NCBI gene;Acc:102168898]	3.908	1.9665	0.00539574	0.0411186	yes	up	0.806667	3.41667
ENSCHIG00000015727	HSP70.1	heat shock protein 70.1 [Source:NCBI gene;Acc:100860849]	3.649	1.8677	6.12379e-09	5.44252e-06	yes	up	473.47	1519.7
ENSCHIG00000014088	CRYAB	crystallin alpha B [Source:NCBI gene;Acc:102171725]	3.629	1.85964	1.07862e-05	0.000842441	yes	up	46.8733	152.325
ENSCHIG00000009616	COL2A1	collagen type II alpha 1 chain [Source:NCBI gene;Acc:100860743]	3.6	1.84798	0.000759102	0.0116154	yes	up	0.0566667	0.181667
ENSCHIG00000014869		C1q and TNF related 9 [Source:NCBI gene;Acc:102168738]	3.516	1.81403	0.000257134	0.00602379	yes	up	0.618333	1.95333
ENSCHIG00000021254	SCD	stearoyl-CoA desaturase [Source:NCBI gene;Acc:100860763]	3.43	1.77831	3.65329e-06	0.000447843	yes	up	6.91833	21.26
ENSCHIG00000019105	TMEM121	transmembrane protein 121 [Source:NCBI gene;Acc:106501804]	3.413	1.77085	4.45138e-05	0.00204569	yes	up	0.996667	2.785
ENSCHIG00000001208	CCDC136	coiled-coil domain containing 136 [Source:NCBI gene;Acc:108633188]	3.214	1.68443	0.00265646	0.0263346	yes	up	3.69167	11.25
ENSCHIG00000013911	PPP1R14A	protein phosphatase 1 regulatory inhibitor subunit 14A [Source:NCBI gene;Acc:102178388]	3.197	1.67686	1.25401e-05	0.000928748	yes	up	86.205	242.46
ENSCHIG00000007724		-	3.145	1.65324	0.00031031	0.00674712	yes	up	0.638333	2.085
ENSCHIG00000020618	GPR37	G protein-coupled receptor 37 [Source:NCBI gene;Acc:102190018]	3.139	1.65026	0.00498549	0.0390383	yes	up	0.378333	1.1
ENSCHIG00000012514	BHLHE23	basic helix-loop-helix family member e23 [Source:NCBI gene;Acc:102190504]	3.098	1.63118	0.00201651	0.0220067	yes	up	1.9	4.97333
ENSCHIG00000020131	PHOSPHO1	phosphoethanolamine/phosphocholine phosphatase [Source:NCBI gene;Acc:102190731]	3.096	1.63057	0.00334952	0.0303225	yes	up	0.47	1.32167
ENSCHIG00000021487	S100B	S100 calcium binding protein B [Source:NCBI gene;Acc:102169524]	3.08	1.62303	0.00590973	0.0437234	yes	up	2.36333	7.01667
ENSCHIG00000003212	PNCK	pregnancy up-regulated nonubiquitous CaM kinase [Source:NCBI gene;Acc:102182769]	3.049	1.60829	0.000230049	0.00569913	yes	up	6.04333	16.6617
ENSCHIG00000007351	HSPB6	heat shock protein family B (small) member 6 [Source:NCBI gene;Acc:102172571]	3.013	1.59101	0.000610224	0.0102016	yes	up	267.965	695.428
ENSCHIG00000009143	ACTG2	actin, gamma 2, smooth muscle, enteric [Source:NCBI gene;Acc:102178279]	2.993	1.58154	0.00275027	0.0268604	yes	up	1884.76	5206.87
ENSCHIG00000003403	RF00614	-	2.948	1.55982	0.00594073	0.0438615	yes	up	0.6	1.54
ENSCHIG00000021170	ANKRD23	ankyrin repeat domain 23 [Source:HGNC Symbol;Acc:HGNC:24470]	2.948	1.55963	0.000547112	0.00948772	yes	up	2.295	6.135
ENSCHIG00000023158	DKKL1	dickkopf like acrosomal protein 1 [Source:NCBI gene;Acc:102168383]	2.944	1.55768	0.000366885	0.00747437	yes	up	1.51833	3.97667
ENSCHIG00000024355	LINGO1	leucine rich repeat and Ig domain containing 1 [Source:NCBI gene;Acc:102188980]	2.935	1.5532	2.56005e-05	0.00139219	yes	up	0.685	1.75333
ENSCHIG00000019111	KCNH2	potassium voltage-gated channel subfamily H member 2 [Source:NCBI gene;Acc:102185061]	2.925	1.54854	2.13643e-06	0.000326667	yes	up	2.45667	6.565
ENSCHIG00000023057	ISYNA1	inositol-3-phosphate synthase 1 [Source:NCBI gene;Acc:102191513]	2.918	1.54485	6.30225e-05	0.00253876	yes	up	11.79	29.0383
ENSCHIG00000002860		-	2.885	1.52833	0.0064342	0.0458388	yes	up	0.17	0.371667
ENSCHIG00000021595	SLC6A17	solute carrier family 6 member 17 [Source:NCBI gene;Acc:102187181]	2.877	1.52471	0.000342866	0.00715522	yes	up	1.365	3.46667
ENSCHIG00000024271	DNAJA4	DnaJ heat shock protein family (Hsp40) member A4 [Source:NCBI gene;Acc:102182172]	2.843	1.5075	5.80656e-05	0.00240727	yes	up	10.8867	24.8783
ENSCHIG00000016430	LRRC75A	leucine rich repeat containing 75A [Source:NCBI gene;Acc:102177749]	2.839	1.50547	7.84726e-06	0.000672217	yes	up	0.641667	1.64
ENSCHIG00000013892	PANX2	pannexin 2 [Source:NCBI gene;Acc:102183406]	2.829	1.50011	0.004491	0.0365135	yes	up	0.978333	2.42
ENSCHIG00000011255	PYGM	glycogen phosphorylase, muscle associated [Source:NCBI gene;Acc:102183771]	2.806	1.4884	0.00159165	0.0190195	yes	up	14.045	36.0833
ENSCHIG00000023451	FAM83D	family with sequence similarity 83 member D [Source:NCBI gene;Acc:102180775]	2.792	1.4812	0.000560326	0.00957169	yes	up	25.0083	63.6433
ENSCHIG00000000941	MIR30D	microRNA 30d [Source:HGNC Symbol;Acc:HGNC:31628]	2.75	1.45919	0.000814611	0.0121296	yes	up	0.793333	1.95667
ENSCHIG00000021818	DACT3	dishevelled binding antagonist of beta catenin 3 [Source:NCBI gene;Acc:106503148]	2.74	1.45416	7.85868e-05	0.00286652	yes	up	7.03167	17.3483
ENSCHIG00000008412		-	2.733	1.45044	0.00547444	0.0414905	yes	up	0.703333	1.66333
ENSCHIG00000009062		low-density lipoprotein receptor-related protein 11-like [Source:NCBI gene;Acc:108636740]	2.719	1.44314	0.000255766	0.00600164	yes	up	6.22667	13.1967
ENSCHIG00000015187	DNAI1	dynein axonemal intermediate chain 1 [Source:NCBI gene;Acc:102170421]	2.715	1.44098	0.000180125	0.004834	yes	up	1.94	4.55333
ENSCHIG00000017983	GPX1	glutathione peroxidase 1 [Source:NCBI gene;Acc:102181442]	2.693	1.42938	2.95923e-07	8.52278e-05	yes	up	175.047	409.068
ENSCHIG00000019753		neuronal regeneration related protein [Source:NCBI gene;Acc:102185569]	2.681	1.42262	0.000280027	0.00627083	yes	up	11.3617	35.3383
ENSCHIG00000000420	FBXO15	F-box protein 15 [Source:NCBI gene;Acc:102179667]	2.64	1.40075	0.00583	0.0432912	yes	up	0.965	2.15333
ENSCHIG00000012981	TPPP	tubulin polymerization promoting protein [Source:NCBI gene;Acc:102185041]	2.625	1.39257	9.69323e-06	0.000783169	yes	up	10.7467	23.7183
ENSCHIG00000026143	GSTA1	glutathione S-transferase A1 [Source:NCBI gene;Acc:102174170]	2.625	1.39255	0.00140423	0.0174547	yes	up	246.432	514.953
ENSCHIG00000020897	MMP11	matrix metallopeptidase 11 [Source:NCBI gene;Acc:102181066]	2.605	1.38102	1.9439e-06	0.000310588	yes	up	5.165	11.7883
ENSCHIG00000017219	NCS1	neuronal calcium sensor 1 [Source:NCBI gene;Acc:102183246]	2.6	1.37838	0.00670203	0.0466942	yes	up	15.0683	33.8567
ENSCHIG00000011645	ENHO	energy homeostasis associated [Source:NCBI gene;Acc:102170873]	2.573	1.36328	0.000174537	0.00474555	yes	up	24.2967	53.62
ENSCHIG00000014090		serpin B6 [Source:NCBI gene;Acc:102171142]	2.567	1.36036	0.00738059	0.0495056	yes	up	0.0833333	0.191667
ENSCHIG00000010710	WFIKKN1	WAP, follistatin/kazal, immunoglobulin, kunitz and netrin domain containing 1 [Source:NCBI gene;Acc:102172587]	2.561	1.35689	0.00317996	0.0294394	yes	up	3.65333	7.78167
ENSCHIG00000021248	TPPP3	tubulin polymerization promoting protein family member 3 [Source:NCBI gene;Acc:102182997]	2.546	1.34823	1.19253e-05	0.000897235	yes	up	25.1283	54.7083
ENSCHIG00000019952	CDK18	cyclin dependent kinase 18 [Source:NCBI gene;Acc:102170623]	2.537	1.34285	0.00119431	0.015799	yes	up	0.963333	2.06667
ENSCHIG00000021015	TINAGL1	tubulointerstitial nephritis antigen like 1 [Source:NCBI gene;Acc:102169636]	2.53	1.33935	2.99676e-07	8.52278e-05	yes	up	24.9	55.925
ENSCHIG00000026730	KCNK3	potassium two pore domain channel subfamily K member 3 [Source:NCBI gene;Acc:106502632]	2.527	1.33756	0.00263212	0.0261922	yes	up	1.95667	4.37833
ENSCHIG00000015460		fatty acid desaturase 2 [Source:NCBI gene;Acc:102171133]	2.523	1.33536	0.00377015	0.0326303	yes	up	6.44167	13.2833
ENSCHIG00000014588	GAL1	galectin 1 [Source:NCBI gene;Acc:102177782]	2.499	1.32121	0.00216348	0.0230275	yes	up	149.538	353.652
ENSCHIG00000025796		heat shock protein family B (small) member 2 [Source:NCBI gene;Acc:102175970]	2.476	1.30803	0.00114969	0.0154523	yes	up	0.955	2.13667
ENSCHIG00000010113		ADAM metallopeptidase with thrombospondin type 1 motif 8 [Source:NCBI gene;Acc:102187567]	2.474	1.30663	0.00382767	0.0329676	yes	up	1.12667	2.66
ENSCHIG00000014375	FUT2	galactoside 2-alpha-L-fucosyltransferase 2 [Source:NCBI gene;Acc:102185028]	2.471	1.30515	0.000562377	0.00958872	yes	up	8.17333	16.8933
ENSCHIG00000017399	PIANP	PILR alpha associated neural protein [Source:NCBI gene;Acc:102171495]	2.468	1.30356	0.00141919	0.0175333	yes	up	0.138333	0.306667
ENSCHIG00000011091	VPS37D	VPS37D, ESCRT-I subunit [Source:NCBI gene;Acc:102179344]	2.454	1.29536	0.000518515	0.00917075	yes	up	2.35333	4.90167
ENSCHIG00000017315	TMEM88	transmembrane protein 88 [Source:NCBI gene;Acc:102168860]	2.44	1.28696	1.79693e-05	0.00113574	yes	up	9.85833	21.365
ENSCHIG00000025071	RRAS	RAS related [Source:NCBI gene;Acc:102184366]	2.44	1.2868	0.000397022	0.00784119	yes	up	97.52	209.592
ENSCHIG00000026174	HSPB7	heat shock protein family B (small) member 7 [Source:NCBI gene;Acc:108637007]	2.429	1.28015	0.00539009	0.0410976	yes	up	11.2233	24.8
ENSCHIG00000022791	HOXB9	homeobox B9 [Source:NCBI gene;Acc:102191831]	2.389	1.25638	0.000197902	0.00511667	yes	up	7.24	16.6117
ENSCHIG00000019758	CNN1	calponin 1 [Source:NCBI gene;Acc:102190599]	2.387	1.2554	0.00408998	0.0342317	yes	up	1103.05	2372.39
ENSCHIG00000018389	ISLR2	immunoglobulin superfamily containing leucine rich repeat 2 [Source:NCBI gene;Acc:102171013]	2.366	1.24233	0.000438298	0.00830065	yes	up	8.97	19.1567
ENSCHIG00000014925	COX7A1	cytochrome c oxidase subunit 7A1, mitochondrial [Source:NCBI gene;Acc:102175610]	2.358	1.23762	0.00569972	0.0425683	yes	up	54.2583	113.73
ENSCHIG00000015975	HSPB1	heat shock protein family B (small) member 1 [Source:NCBI gene;Acc:108633906]	2.345	1.2293	5.03458e-06	0.000515049	yes	up	1125.69	2273.38
ENSCHIG00000014464	RRAD	RRAD, Ras related glycolysis inhibitor and calcium channel regulator [Source:NCBI gene;Acc:102175153]	2.338	1.22544	0.001756	0.0202189	yes	up	34.555	66.58
ENSCHIG00000021658	CSDC2	cold shock domain containing C2 [Source:NCBI gene;Acc:102191408]	2.33	1.22019	0.00205633	0.0222704	yes	up	1.245	2.71667
ENSCHIG00000013618	TRIP6	thyroid hormone receptor interactor 6 [Source:NCBI gene;Acc:102187099]	2.327	1.21877	1.95284e-07	6.54659e-05	yes	up	10.1233	21.0233
ENSCHIG00000011227		solute carrier family 22 member 31 [Source:NCBI gene;Acc:102170261]	2.317	1.21224	0.00705733	0.0482484	yes	up	0.741667	1.41667
ENSCHIG00000017713		G protein signaling modulator 1 [Source:NCBI gene;Acc:108637174]	2.307	1.20631	0.00107267	0.0146523	yes	up	3.4	7.27833
ENSCHIG00000008416	DES	desmin [Source:NCBI gene;Acc:102180712]	2.301	1.20223	0.00631699	0.0453904	yes	up	1541.81	3205.67
ENSCHIG00000022366	KLHDC8B	kelch domain containing 8B [Source:NCBI gene;Acc:102182548]	2.297	1.19958	2.37574e-05	0.00134594	yes	up	8.70333	17.1883
ENSCHIG00000023351	CRYBB1	crystallin beta B1 [Source:NCBI gene;Acc:102187250]	2.295	1.19852	0.00657145	0.0462032	yes	up	2.36167	4.97167
ENSCHIG00000018218	FOXO6	forkhead box O6 [Source:NCBI gene;Acc:102185425]	2.288	1.19417	0.00239281	0.0245319	yes	up	0.581667	1.13
ENSCHIG00000015151		CD24 molecule [Source:NCBI gene;Acc:108636727]	2.28	1.18913	0.00416499	0.0346757	yes	up	4.30167	10.39
ENSCHIG00000025570	INKA2	inka box actin regulator 2 [Source:NCBI gene;Acc:102176483]	2.274	1.18549	0.000188665	0.00495899	yes	up	10.9967	22.2933
ENSCHIG00000017416	MRPL2	mitochondrial ribosomal protein L2 [Source:NCBI gene;Acc:102172851]	2.261	1.17711	0.00154401	0.018668	yes	up	15.0733	28.5733
ENSCHIG00000013673	PPP1R1A	protein phosphatase 1 regulatory inhibitor subunit 1A [Source:NCBI gene;Acc:102176303]	2.256	1.17362	0.00205104	0.0222469	yes	up	5.57167	11
ENSCHIG00000014632	WNT7B	Wnt family member 7B [Source:NCBI gene;Acc:102176768]	2.241	1.16408	0.00499913	0.0391236	yes	up	3.215	5.905
ENSCHIG00000021969		neurturin [Source:NCBI gene;Acc:108634739]	2.229	1.15645	0.000399907	0.0078437	yes	up	3.98333	7.30833
ENSCHIG00000000144	DIPK1C	divergent protein kinase domain 1C [Source:NCBI gene;Acc:106503530]	2.225	1.15355	0.000823375	0.0122217	yes	up	4.71333	8.79167
ENSCHIG00000022549	LRRC73	leucine rich repeat containing 73 [Source:NCBI gene;Acc:102179716]	2.22	1.15064	0.00159511	0.0190415	yes	up	0.63	1.29167
ENSCHIG00000023580	DNAJC4	DnaJ heat shock protein family (Hsp40) member C4 [Source:NCBI gene;Acc:102180108]	2.22	1.1505	5.35086e-07	0.00011706	yes	up	15.0567	28.4067
ENSCHIG00000019195	BAG3	BCL2 associated athanogene 3 [Source:NCBI gene;Acc:102168602]	2.217	1.14891	1.51693e-05	0.00104206	yes	up	43.84	83.9867
ENSCHIG00000018247		galectin 7 [Source:NCBI gene;Acc:102180072]	2.217	1.14844	0.00393824	0.0334133	yes	up	449.5	876.668
ENSCHIG00000019888	HS3ST6	heparan sulfate-glucosamine 3-sulfotransferase 6 [Source:NCBI gene;Acc:102191480]	2.212	1.14505	0.00192767	0.0214305	yes	up	6.20167	11.46
ENSCHIG00000023624	CIB2	calcium and integrin binding family member 2 [Source:NCBI gene;Acc:102180431]	2.194	1.13329	0.00152401	0.0184595	yes	up	21.955	43.3433
ENSCHIG00000017089	LIMS2	LIM zinc finger domain containing 2 [Source:NCBI gene;Acc:102178216]	2.187	1.12907	0.00115268	0.015478	yes	up	98.42	189.105
ENSCHIG00000026813	STUM	stum, mechanosensory transduction mediator homolog [Source:NCBI gene;Acc:102185388]	2.184	1.12698	0.00125541	0.0162586	yes	up	2.00667	3.38333
ENSCHIG00000016240	CSPG5	chondroitin sulfate proteoglycan 5 [Source:NCBI gene;Acc:102172494]	2.172	1.1193	0.000641451	0.0105207	yes	up	0.551667	1.07
ENSCHIG00000015894	DMPK	DM1 protein kinase [Source:NCBI gene;Acc:102173496]	2.163	1.11311	0.00372038	0.0323571	yes	up	104.165	204.148
ENSCHIG00000014769	TAGLN	transgelin [Source:NCBI gene;Acc:102185937]	2.159	1.11006	0.00490443	0.0386923	yes	up	3130.44	5955.42
ENSCHIG00000014590	TPM2	tropomyosin 2 [Source:NCBI gene;Acc:102178827]	2.149	1.10375	0.00706308	0.0482638	yes	up	3153.42	6112.72
ENSCHIG00000020719	SLC52A3	solute carrier family 52 member 3 [Source:NCBI gene;Acc:102174672]	2.147	1.10245	0.00238975	0.0245182	yes	up	0.955	1.85667
ENSCHIG00000027209		-	2.132	1.09189	0.00207323	0.0223661	yes	up	63.1033	116.692
ENSCHIG00000025767	CSRP2	cysteine and glycine rich protein 2 [Source:NCBI gene;Acc:102181652]	2.124	1.08695	0.000304193	0.00664509	yes	up	16.3	29.1133
ENSCHIG00000025563	JPH2	junctophilin 2 [Source:NCBI gene;Acc:102184074]	2.115	1.08051	0.00376776	0.0326295	yes	up	14.0633	27.145
ENSCHIG00000015638	HSPB8	heat shock protein family B (small) member 8 [Source:NCBI gene;Acc:102182717]	2.112	1.07839	7.13773e-05	0.00276563	yes	up	87.2333	158.492
ENSCHIG00000024027	TMEM38A	transmembrane protein 38A [Source:NCBI gene;Acc:102177050]	2.1	1.07047	0.000550143	0.00948773	yes	up	4.67833	8.83833
ENSCHIG00000013748	CCDC69	coiled-coil domain containing 69 [Source:NCBI gene;Acc:102190219]	2.095	1.0667	0.00124877	0.0162212	yes	up	7.23667	13.5533
ENSCHIG00000025412	REEP6	receptor accessory protein 6 [Source:NCBI gene;Acc:102191695]	2.094	1.06655	0.000164722	0.00454825	yes	up	2.76667	4.90333
ENSCHIG00000024917	SMARCD3	SWI/SNF related, matrix associated, actin dependent regulator of chromatin, subfamily d, member 3 [Source:NCBI gene;Acc:102179351]	2.092	1.06463	0.000668965	0.010808	yes	up	42.7717	83.615
ENSCHIG00000021117	C16orf74	chromosome 16 open reading frame 74 [Source:HGNC Symbol;Acc:HGNC:23362]	2.09	1.0635	1.05294e-07	4.53724e-05	yes	up	5.39167	9.11
ENSCHIG00000019901	SMTN	smoothelin [Source:NCBI gene;Acc:102170811]	2.083	1.05882	0.00296969	0.0282847	yes	up	321.845	580.638
ENSCHIG00000010342	NAT14	N-acetyltransferase 14 (putative) [Source:NCBI gene;Acc:108638046]	2.077	1.05458	2.8075e-05	0.00150085	yes	up	9.515	16.5267
ENSCHIG00000007099	CRIP2	cysteine-rich protein 2 [Source:NCBI gene;Acc:106503400]	2.077	1.05437	1.58938e-05	0.00107624	yes	up	62.5567	111.365
ENSCHIG00000026913	IL17B	interleukin 17B [Source:NCBI gene;Acc:102181208]	2.077	1.05429	0.000802457	0.0120623	yes	up	3.38667	6.65
ENSCHIG00000017634	PPP1R12C	protein phosphatase 1 regulatory subunit 12C [Source:NCBI gene;Acc:102187707]	2.076	1.05387	0.00183959	0.0208106	yes	up	52.0833	98.6167
ENSCHIG00000011379	SNN	stannin [Source:NCBI gene;Acc:102168315]	2.076	1.05377	0.000209306	0.00531038	yes	up	25.355	44.125
ENSCHIG00000014954	WNK2	WNK lysine deficient protein kinase 2 [Source:NCBI gene;Acc:102191045]	2.071	1.0503	0.00299635	0.0283571	yes	up	1.65	3.175
ENSCHIG00000014438	BANP	BTG3 associated nuclear protein [Source:NCBI gene;Acc:102191360]	2.07	1.04944	0.00553137	0.0417717	yes	up	9.32167	16.415
ENSCHIG00000010909	TRNP1	TMF1-regulated nuclear protein 1 [Source:HGNC Symbol;Acc:HGNC:34348]	2.055	1.03916	3.16671e-07	8.61393e-05	yes	up	1.4	2.59333
ENSCHIG00000010289		-	2.055	1.03906	1.30219e-05	0.000954495	yes	up	85.2483	151.332
ENSCHIG00000011607	IGFBP5	insulin like growth factor binding protein 5 [Source:NCBI gene;Acc:100860950]	2.05	1.03594	0.000246068	0.00593616	yes	up	44.0833	82.5333
ENSCHIG00000026456	TMCC2	transmembrane and coiled-coil domain family 2 [Source:NCBI gene;Acc:102181618]	2.048	1.03414	0.00207998	0.0223731	yes	up	0.815	1.41833
ENSCHIG00000005426	FAM181B	family with sequence similarity 181 member B [Source:NCBI gene;Acc:106503716]	2.041	1.02925	0.00517346	0.0400471	yes	up	1.24833	2.20333
ENSCHIG00000003518	HSPH1	heat shock protein family H (Hsp110) member 1 [Source:NCBI gene;Acc:102187688]	2.039	1.02755	0.00137332	0.017221	yes	up	19.6333	35.3583
ENSCHIG00000010175	PADI3	peptidyl arginine deiminase 3 [Source:NCBI gene;Acc:102171827]	2.036	1.02606	0.00480799	0.0382809	yes	up	6.65667	12.3383
ENSCHIG00000022054		jumonji domain containing 6, arginine demethylase and lysine hydroxylase [Source:NCBI gene;Acc:102189902]	2.036	1.02594	3.84676e-06	0.000459672	yes	up	14.92	26.2817
ENSCHIG00000018279	ADSSL1	adenylosuccinate synthase like 1 [Source:NCBI gene;Acc:102185692]	2.032	1.02296	0.00290001	0.0278411	yes	up	9.875	17.2883
ENSCHIG00000009887	C1QTNF2	C1q and TNF related 2 [Source:NCBI gene;Acc:102182034]	2.03	1.02161	0.00604669	0.0443673	yes	up	2.58	5.52333
ENSCHIG00000011977	KCNG2	potassium voltage-gated channel modifier subfamily G member 2 [Source:NCBI gene;Acc:106503526]	2.028	1.0204	0.00449024	0.0365135	yes	up	1.09833	2.08667
ENSCHIG00000024167	GMPR	guanosine monophosphate reductase [Source:NCBI gene;Acc:102173350]	2.026	1.01875	0.00174021	0.0200695	yes	up	20.885	37.8017
ENSCHIG00000023052	RFX2	regulatory factor X2 [Source:NCBI gene;Acc:102179845]	2.012	1.00829	0.000112225	0.00358614	yes	up	11.2383	19.3683
ENSCHIG00000001854	METTL22	methyltransferase like 22 [Source:NCBI gene;Acc:102171122]	2.01	1.0075	7.42585e-05	0.00279556	yes	up	25.1133	44.1417
ENSCHIG00000015814	FAM81A	family with sequence similarity 81 member A [Source:NCBI gene;Acc:102178453]	2.01	1.00704	0.000460664	0.00858537	yes	up	0.633333	1.14833
ENSCHIG00000011853	FFAR4	free fatty acid receptor 4 [Source:NCBI gene;Acc:102183756]	2.005	1.00329	0.00303814	0.0285762	yes	up	3.78	6.355
ENSCHIG00000026482	CEP97	centrosomal protein 97 [Source:NCBI gene;Acc:102185605]	0.5	-1.00103	6.27278e-07	0.000131175	yes	down	2.44167	1.085
ENSCHIG00000014500	ZNF292	zinc finger protein 292 [Source:NCBI gene;Acc:102188594]	0.499	-1.00202	0.000108909	0.00351679	yes	down	2.28	1.05667
ENSCHIG00000026457	CEP128	centrosomal protein 128 [Source:NCBI gene;Acc:102174575]	0.498	-1.00642	0.00207775	0.0223661	yes	down	0.566667	0.26
ENSCHIG00000024802	CCPG1	cell cycle progression 1 [Source:NCBI gene;Acc:102187868]	0.498	-1.00696	9.44383e-05	0.0032754	yes	down	14.8267	6.52667
ENSCHIG00000015414	CIP2A	cell proliferation regulating inhibitor of protein phosphatase 2A [Source:NCBI gene;Acc:102175617]	0.497	-1.00959	0.00191768	0.0214046	yes	down	1.17	0.546667
ENSCHIG00000027171		low affinity immunoglobulin gamma Fc region receptor II [Source:NCBI gene;Acc:102186356]	0.497	-1.00964	0.00669153	0.0466668	yes	down	17.0267	7.38333
ENSCHIG00000022451	P2RX7	purinergic receptor P2X 7 [Source:NCBI gene;Acc:102174145]	0.496	-1.01219	0.000444149	0.00839866	yes	down	7.51667	3.30167
ENSCHIG00000013869	SUCO	SUN domain containing ossification factor [Source:NCBI gene;Acc:102178472]	0.496	-1.01258	5.15244e-07	0.000114481	yes	down	7.38667	3.35333
ENSCHIG00000026435	CPNE8	copine 8 [Source:NCBI gene;Acc:102190022]	0.496	-1.01304	1.4536e-05	0.0010178	yes	down	8.53667	3.45667
ENSCHIG00000004741	CENPJ	centromere protein J [Source:NCBI gene;Acc:102173755]	0.495	-1.01468	0.00620188	0.0449265	yes	down	1.67667	0.781667
ENSCHIG00000008249	POSTN	periostin [Source:NCBI gene;Acc:102172638]	0.495	-1.01588	0.00408409	0.0342317	yes	down	52.98	26.1733
ENSCHIG00000006732	LRMP	lymphoid restricted membrane protein [Source:NCBI gene;Acc:102184978]	0.494	-1.01623	0.00458181	0.0369559	yes	down	5.28333	2.30667
ENSCHIG00000010969	DOCK10	dedicator of cytokinesis 10 [Source:NCBI gene;Acc:102188364]	0.492	-1.02202	0.00209143	0.0224322	yes	down	2.105	0.926667
ENSCHIG00000014382	NEPRO	nucleolus and neural progenitor protein [Source:NCBI gene;Acc:102183266]	0.492	-1.02251	2.02509e-07	6.54659e-05	yes	down	4.63833	2.055
ENSCHIG00000021393	FMN1	formin 1 [Source:NCBI gene;Acc:102191337]	0.492	-1.02287	0.00300007	0.028365	yes	down	3.44333	1.54833
ENSCHIG00000013812	PHTF2	putative homeodomain transcription factor 2 [Source:NCBI gene;Acc:102186553]	0.492	-1.02462	0.00647715	0.0459606	yes	down	2.16	0.918333
ENSCHIG00000016940	ATAD5	ATPase family, AAA domain containing 5 [Source:NCBI gene;Acc:102179698]	0.491	-1.02741	0.00263094	0.0261922	yes	down	0.798333	0.363333
ENSCHIG00000023736	FGL2	fibrinogen like 2 [Source:NCBI gene;Acc:102188376]	0.491	-1.02743	0.0065338	0.0461553	yes	down	13.5167	6.14833
ENSCHIG00000000066	MCF2L	MCF.2 cell line derived transforming sequence like [Source:NCBI gene;Acc:102174132]	0.49	-1.02838	0.00340085	0.0304727	yes	down	1.58833	0.71
ENSCHIG00000016831	ZNF570	zinc finger protein 570 [Source:NCBI gene;Acc:102173877]	0.49	-1.02851	0.00735884	0.0494696	yes	down	0.875	0.383333
ENSCHIG00000011397	SMC3	structural maintenance of chromosomes 3 [Source:NCBI gene;Acc:102186457]	0.489	-1.0321	0.000190983	0.00499692	yes	down	7.57167	2.775
ENSCHIG00000016192	GOLGA4	golgin A4 [Source:NCBI gene;Acc:102182919]	0.489	-1.03308	0.000378254	0.00759714	yes	down	8.17833	3.62333
ENSCHIG00000017400	LMLN	leishmanolysin like peptidase [Source:NCBI gene;Acc:102174433]	0.488	-1.03435	0.00579545	0.0431238	yes	down	1.05167	0.478333
ENSCHIG00000022090	BRWD3	bromodomain and WD repeat domain containing 3 [Source:NCBI gene;Acc:102182389]	0.488	-1.03458	4.79646e-05	0.00212206	yes	down	2.76	1.205
ENSCHIG00000011272	PLXNC1	plexin C1 [Source:NCBI gene;Acc:102175748]	0.488	-1.03492	0.00731474	0.0492965	yes	down	2.3	2.345
ENSCHIG00000020898	IL36A	interleukin-36 alpha [Source:NCBI gene;Acc:102181965]	0.487	-1.03743	0.00362799	0.0318457	yes	down	186.527	84.095
ENSCHIG00000012157	ZNF182	zinc finger protein 182 [Source:NCBI gene;Acc:102179553]	0.487	-1.03891	0.00521668	0.0402284	yes	down	0.571667	0.291667
ENSCHIG00000022217		bromodomain adjacent to zinc finger domain 2B [Source:NCBI gene;Acc:102191743]	0.487	-1.0394	0.00334997	0.0303225	yes	down	2.02833	0.913333
ENSCHIG00000015119	PIK3C2A	phosphatidylinositol-4-phosphate 3-kinase catalytic subunit type 2 alpha [Source:NCBI gene;Acc:102186784]	0.486	-1.04104	2.02567e-07	6.54659e-05	yes	down	3.495	1.53667
ENSCHIG00000025573	NABP1	nucleic acid binding protein 1 [Source:NCBI gene;Acc:102190362]	0.486	-1.04142	0.00645375	0.0459091	yes	down	3.88833	1.71
ENSCHIG00000007485	PLCB2	phospholipase C beta 2 [Source:NCBI gene;Acc:102169966]	0.486	-1.04244	0.00279844	0.0271816	yes	down	1.145	0.501667
ENSCHIG00000010470	FAM214A	family with sequence similarity 214 member A [Source:NCBI gene;Acc:102190965]	0.485	-1.04489	0.00119244	0.015799	yes	down	8.98667	4.13667
ENSCHIG00000017611	CD83	CD83 molecule [Source:NCBI gene;Acc:102185234]	0.484	-1.04578	0.000448805	0.00844182	yes	down	5.89333	2.34167
ENSCHIG00000001565	ZNF283	zinc finger protein 283 [Source:NCBI gene;Acc:102191642]	0.484	-1.0473	0.0019929	0.0218666	yes	down	0.781667	0.336667
ENSCHIG00000019246	LIPK	lipase family member K [Source:NCBI gene;Acc:102189647]	0.484	-1.04761	0.00703805	0.0481807	yes	down	4.55167	1.785
ENSCHIG00000019688		cationic amino acid transporter 3 [Source:NCBI gene;Acc:102183956]	0.484	-1.04801	0.00283419	0.0273235	yes	down	7.17333	1.55833
ENSCHIG00000018163	ERAP2	endoplasmic reticulum aminopeptidase 2 [Source:NCBI gene;Acc:102186114]	0.484	-1.04837	2.33127e-05	0.00133135	yes	down	9.035	3.91
ENSCHIG00000016695	ACPP	acid phosphatase, prostate [Source:NCBI gene;Acc:102174247]	0.483	-1.05004	0.00109581	0.0148829	yes	down	24.2433	11.0417
ENSCHIG00000002772	KIF18A	kinesin family member 18A [Source:NCBI gene;Acc:102181409]	0.483	-1.05033	7.64647e-05	0.00282878	yes	down	0.368333	0.156667
ENSCHIG00000015176	FANCM	FA complementation group M [Source:NCBI gene;Acc:102179326]	0.483	-1.05067	0.000426932	0.00820227	yes	down	1.695	0.738333
ENSCHIG00000026714	ITGA2	integrin subunit alpha 2 [Source:NCBI gene;Acc:102172198]	0.482	-1.05245	0.000675203	0.0108736	yes	down	1.48333	0.653333
ENSCHIG00000006089	FLT3	fms related tyrosine kinase 3 [Source:NCBI gene;Acc:102189319]	0.482	-1.05358	0.00632439	0.0454094	yes	down	0.585	0.251667
ENSCHIG00000018483	GPC3	glypican 3 [Source:NCBI gene;Acc:102179551]	0.479	-1.06078	0.00167754	0.0196742	yes	down	13.3983	6.03167
ENSCHIG00000015958	BRIP1	BRCA1 interacting protein C-terminal helicase 1 [Source:NCBI gene;Acc:102171813]	0.477	-1.06694	7.76184e-05	0.00284468	yes	down	1.1	0.466667
ENSCHIG00000025514	CPM	carboxypeptidase M [Source:NCBI gene;Acc:102172872]	0.476	-1.06957	0.000954981	0.0134587	yes	down	22.715	9.185
ENSCHIG00000015873	TLR3	toll like receptor 3 [Source:NCBI gene;Acc:102182757]	0.476	-1.07032	0.00122072	0.0160572	yes	down	2.92333	1.295
ENSCHIG00000026111	LRRC8B	leucine rich repeat containing 8 VRAC subunit B [Source:NCBI gene;Acc:102173990]	0.476	-1.07057	0.00441169	0.0361164	yes	down	1.15167	0.513333
ENSCHIG00000026325		heparan sulfate 2-O-sulfotransferase 1 [Source:NCBI gene;Acc:102183844]	0.475	-1.07248	0.000266797	0.00607151	yes	down	3.32667	1.525
ENSCHIG00000023368	PRDM1	PR/SET domain 1 [Source:NCBI gene;Acc:102181213]	0.475	-1.07332	0.00238387	0.0245152	yes	down	13.7883	5.85167
ENSCHIG00000012583	TMF1	TATA element modulatory factor 1 [Source:NCBI gene;Acc:102176468]	0.475	-1.07439	7.3836e-06	0.000644419	yes	down	7.77833	3.38
ENSCHIG00000017011	DHX58	DExH-box helicase 58 [Source:NCBI gene;Acc:102183820]	0.475	-1.07457	0.00303836	0.0285762	yes	down	23.91	10.0383
ENSCHIG00000020242	ZBTB1	zinc finger and BTB domain containing 1 [Source:NCBI gene;Acc:102186967]	0.474	-1.07625	4.40096e-07	0.000107899	yes	down	9.175	4.09833
ENSCHIG00000017909	ECM2	extracellular matrix protein 2 [Source:NCBI gene;Acc:102168258]	0.474	-1.07683	0.000250397	0.00598429	yes	down	14.8667	6.23333
ENSCHIG00000004333	STYK1	serine/threonine/tyrosine kinase 1 [Source:NCBI gene;Acc:102181276]	0.473	-1.07952	0.000322801	0.00685861	yes	down	6.80667	2.92333
ENSCHIG00000002489		-	0.472	-1.08255	0.000448719	0.00844182	yes	down	425.075	179.807
ENSCHIG00000024402	SNTB2	syntrophin beta 2 [Source:NCBI gene;Acc:102182339]	0.472	-1.08379	2.5837e-06	0.000374506	yes	down	11.25	5.345
ENSCHIG00000020991	IL18	interleukin 18 [Source:NCBI gene;Acc:100861190]	0.472	-1.08399	0.00193102	0.0214356	yes	down	2.04333	1.015
ENSCHIG00000016567	BBS10	Bardet-Biedl syndrome 10 [Source:NCBI gene;Acc:102181188]	0.472	-1.08449	0.000153237	0.00436679	yes	down	1.61667	0.708333
ENSCHIG00000016034	TXNDC16	thioredoxin domain containing 16 [Source:NCBI gene;Acc:102181215]	0.471	-1.08535	0.00389967	0.0333605	yes	down	0.836667	0.368333
ENSCHIG00000013934	STK17B	serine/threonine kinase 17b [Source:NCBI gene;Acc:106501913]	0.469	-1.09216	0.000106321	0.0034836	yes	down	6.23833	2.56667
ENSCHIG00000022938		zinc finger protein 501 [Source:NCBI gene;Acc:102178939]	0.468	-1.0958	0.00246823	0.0250372	yes	down	2.00667	0.875
ENSCHIG00000013747	LYPD5	LY6/PLAUR domain containing 5 [Source:NCBI gene;Acc:102188342]	0.468	-1.09673	0.00525699	0.0404297	yes	down	23.785	10.2767
ENSCHIG00000012658	THEMIS2	thymocyte selection associated family member 2 [Source:NCBI gene;Acc:102176747]	0.467	-1.09939	0.0067784	0.0470936	yes	down	7.71667	3.08333
ENSCHIG00000015580	RNF39	ring finger protein 39 [Source:NCBI gene;Acc:102171828]	0.466	-1.10039	0.00334209	0.0303225	yes	down	26.0783	11.1567
ENSCHIG00000020278	PIK3AP1	phosphoinositide-3-kinase adaptor protein 1 [Source:NCBI gene;Acc:102172864]	0.463	-1.11025	0.00614464	0.0447856	yes	down	3.91333	1.68833
ENSCHIG00000018772	PRDM5	PR/SET domain 5 [Source:NCBI gene;Acc:102189934]	0.463	-1.11025	0.000114771	0.00361073	yes	down	1.435	0.618333
ENSCHIG00000012350	KIF20B	kinesin family member 20B [Source:NCBI gene;Acc:102171123]	0.463	-1.11112	0.00272963	0.0267323	yes	down	1.40167	0.581667
ENSCHIG00000015692	BTBD8	BTB domain containing 8 [Source:HGNC Symbol;Acc:HGNC:21019]	0.462	-1.11379	0.00331139	0.0302456	yes	down	0.883333	0.375
ENSCHIG00000020777		ERCC excision repair 6 like 2 [Source:NCBI gene;Acc:102188044]	0.461	-1.11825	8.26928e-05	0.00293687	yes	down	3.45	1.49167
ENSCHIG00000017746	PDE1C	calcium/calmodulin-dependent 3',5'-cyclic nucleotide phosphodiesterase 1C [Source:NCBI gene;Acc:102180455]	0.459	-1.12213	0.00425503	0.0352681	yes	down	1.32667	0.63
ENSCHIG00000011688	KIAA1109	KIAA1109 ortholog [Source:NCBI gene;Acc:102183810]	0.459	-1.12408	4.25943e-06	0.000476922	yes	down	3.24333	1.42333
ENSCHIG00000025341	NMI	N-myc and STAT interactor [Source:NCBI gene;Acc:102184384]	0.458	-1.12754	0.000721964	0.0112941	yes	down	11.4	4.84333
ENSCHIG00000009231	MPEG1	macrophage-expressed gene 1 protein [Source:NCBI gene;Acc:102177263]	0.456	-1.13138	0.00642179	0.0458193	yes	down	26.5467	10.83
ENSCHIG00000000807	DAPP1	dual adaptor of phosphotyrosine and 3-phosphoinositides 1 [Source:NCBI gene;Acc:102178892]	0.456	-1.13226	0.00101702	0.0140681	yes	down	3.5	1.32667
ENSCHIG00000023226	LEPR	leptin receptor [Source:NCBI gene;Acc:102180987]	0.456	-1.13328	0.000485538	0.00881644	yes	down	0.771667	0.341667
ENSCHIG00000022130	DNASE1L3	deoxyribonuclease 1 like 3 [Source:NCBI gene;Acc:102187173]	0.455	-1.13584	0.000284548	0.00635207	yes	down	52.1317	21.3
ENSCHIG00000013522	FOLH1	folate hydrolase 1B [Source:NCBI gene;Acc:102190665]	0.455	-1.13602	0.00683978	0.0473552	yes	down	1.66167	0.71
ENSCHIG00000021191	BTK	Bruton tyrosine kinase [Source:NCBI gene;Acc:102176204]	0.455	-1.13652	0.00531504	0.0407439	yes	down	2.46167	1
ENSCHIG00000025283	HES4	hes family bHLH transcription factor 4 [Source:NCBI gene;Acc:106502961]	0.455	-1.13759	0.0072602	0.0490941	yes	down	2.90167	1.185
ENSCHIG00000014043	YOD1	YOD1 deubiquitinase [Source:NCBI gene;Acc:102177549]	0.454	-1.13922	0.000383054	0.00765652	yes	down	6.11833	2.37167
ENSCHIG00000020429	CEP135	centrosomal protein 135 [Source:NCBI gene;Acc:102176312]	0.453	-1.1423	0.00612476	0.0447042	yes	down	0.323333	0.138333
ENSCHIG00000019769	AADACL3	arylacetamide deacetylase like 3 [Source:NCBI gene;Acc:102175231]	0.453	-1.14241	0.00449407	0.0365175	yes	down	3.38833	1.19667
ENSCHIG00000027140	ROR1	receptor tyrosine kinase like orphan receptor 1 [Source:NCBI gene;Acc:102182092]	0.452	-1.14445	0.00345605	0.0307734	yes	down	1.02167	0.431667
ENSCHIG00000022467	RRM2B	ribonucleotide reductase regulatory TP53 inducible subunit M2B [Source:NCBI gene;Acc:102173102]	0.451	-1.14881	0.000228996	0.00568294	yes	down	2.02833	0.851667
ENSCHIG00000017003	GRAMD1C	GRAM domain containing 1C [Source:NCBI gene;Acc:102186521]	0.451	-1.14902	0.000124109	0.00377909	yes	down	4.40833	1.95833
ENSCHIG00000006496	FAM124B	family with sequence similarity 124 member B [Source:NCBI gene;Acc:102187816]	0.449	-1.15572	0.00069198	0.0111192	yes	down	0.511667	0.206667
ENSCHIG00000011404	RESF1	retroelement silencing factor 1 [Source:NCBI gene;Acc:102182386]	0.448	-1.15819	6.62682e-06	0.000619956	yes	down	2.81	1.12833
ENSCHIG00000024469	IL1B	interleukin 1 beta [Source:NCBI gene;Acc:100860816]	0.448	-1.15864	0.00225557	0.0236013	yes	down	5.535	2.21667
ENSCHIG00000002573	RASA2	RAS p21 protein activator 2 [Source:NCBI gene;Acc:102181436]	0.448	-1.15869	0.000246879	0.00593733	yes	down	3.76167	1.56333
ENSCHIG00000025333	KIF21A	kinesin family member 21A [Source:NCBI gene;Acc:102189737]	0.447	-1.1629	0.000354505	0.0073061	yes	down	4.61	1.69333
ENSCHIG00000001541		apolipoprotein L3-like [Source:NCBI gene;Acc:102170968]	0.446	-1.16397	0.0028059	0.0272045	yes	down	0.966667	0.403333
ENSCHIG00000021048	DPP4	dipeptidyl peptidase 4 [Source:NCBI gene;Acc:102184205]	0.446	-1.16508	0.00745459	0.049741	yes	down	2.84833	1.16667
ENSCHIG00000013795	NCOA7	nuclear receptor coactivator 7 [Source:NCBI gene;Acc:102180941]	0.446	-1.1653	8.74969e-06	0.000736216	yes	down	7.54167	3.03833
ENSCHIG00000007459	TFPI	tissue factor pathway inhibitor [Source:NCBI gene;Acc:102185317]	0.446	-1.16602	3.55952e-05	0.00175216	yes	down	3.36	1.34
ENSCHIG00000020356	FGD4	FYVE, RhoGEF and PH domain containing 4 [Source:NCBI gene;Acc:102181008]	0.445	-1.16947	0.000984195	0.0137478	yes	down	1.33	0.52
ENSCHIG00000007892	DUSP14	dual specificity phosphatase 14 [Source:NCBI gene;Acc:102177921]	0.443	-1.17396	0.0043639	0.0358076	yes	down	68.5317	27.6033
ENSCHIG00000024104	ABCA1	ATP binding cassette subfamily A member 1 [Source:NCBI gene;Acc:102179197]	0.443	-1.17403	0.00011449	0.00360987	yes	down	7.00667	2.89167
ENSCHIG00000019391	MLKL	mixed lineage kinase domain like pseudokinase [Source:NCBI gene;Acc:102172181]	0.443	-1.17616	4.57169e-05	0.00207698	yes	down	1.50833	0.615
ENSCHIG00000021418	EEA1	early endosome antigen 1 [Source:NCBI gene;Acc:102175190]	0.442	-1.17657	0.000102541	0.00341163	yes	down	5.74833	2.225
ENSCHIG00000025792	LRRC58	leucine rich repeat containing 58 [Source:NCBI gene;Acc:102171379]	0.442	-1.1767	3.31957e-05	0.001668	yes	down	5.64333	2.28833
ENSCHIG00000023433		-	0.442	-1.17687	0.00397669	0.0336388	yes	down	7.85333	2.96833
ENSCHIG00000011534	EDNRB	endothelin receptor type B [Source:NCBI gene;Acc:102186699]	0.442	-1.17856	3.07587e-06	0.000394044	yes	down	4.70333	1.82167
ENSCHIG00000018909	SMC4	structural maintenance of chromosomes 4 [Source:NCBI gene;Acc:102180158]	0.441	-1.18005	2.44422e-05	0.00136838	yes	down	6.19833	2.49667
ENSCHIG00000013723	CCDC171	coiled-coil domain containing 171 [Source:NCBI gene;Acc:102188500]	0.44	-1.18352	0.00458074	0.0369559	yes	down	0.3	0.123333
ENSCHIG00000010643	GREM1	gremlin 1, DAN family BMP antagonist [Source:HGNC Symbol;Acc:HGNC:2001]	0.439	-1.1865	0.00477648	0.0380726	yes	down	54.5333	23.415
ENSCHIG00000008817	TAGAP	T cell activation RhoGTPase activating protein [Source:NCBI gene;Acc:102170605]	0.439	-1.1871	0.00724658	0.0490697	yes	down	2.44333	0.938333
ENSCHIG00000011089	ZBED6	zinc finger BED-type containing 6 [Source:NCBI gene;Acc:108633245]	0.439	-1.18758	0.000121807	0.00374257	yes	down	4.55833	1.87833
ENSCHIG00000016420	ATP7A	ATPase copper transporting alpha [Source:NCBI gene;Acc:102185993]	0.438	-1.18956	2.14864e-05	0.00126779	yes	down	8.48333	4.68167
ENSCHIG00000010416	OSBPL8	oxysterol binding protein like 8 [Source:NCBI gene;Acc:102185062]	0.438	-1.18961	1.27222e-07	5.16883e-05	yes	down	8.83	3.20833
ENSCHIG00000024039	MUC15	mucin 15, cell surface associated [Source:NCBI gene;Acc:102178191]	0.438	-1.19129	0.0001282	0.0038705	yes	down	10.5	4.24333
ENSCHIG00000016805		-	0.438	-1.19168	0.000892173	0.0128468	yes	down	5.46667	1.83167
ENSCHIG00000023034	CLEC4A	C-type lectin domain family 4 member A [Source:NCBI gene;Acc:102180291]	0.437	-1.19544	0.00250561	0.0252873	yes	down	5.77333	2.23
ENSCHIG00000021203		transmembrane protease serine 11G-like [Source:NCBI gene;Acc:102186941]	0.435	-1.2004	0.00554202	0.0418125	yes	down	30.54	11.9
ENSCHIG00000018896	CFD	complement factor D [Source:NCBI gene;Acc:102173560]	0.435	-1.20105	6.03483e-05	0.00248357	yes	down	50.3233	19.6333
ENSCHIG00000012563	CYBB	cytochrome b-245 heavy chain [Source:NCBI gene;Acc:102175938]	0.434	-1.20315	0.00211783	0.0226432	yes	down	11.9917	4.38667
ENSCHIG00000025357	CEP85L	centrosomal protein 85 like [Source:NCBI gene;Acc:102172626]	0.434	-1.20506	0.000804773	0.0120651	yes	down	1.36333	0.556667
ENSCHIG00000004276	FAP	fibroblast activation protein alpha [Source:NCBI gene;Acc:102183462]	0.433	-1.20852	0.00285875	0.0275417	yes	down	5.97333	2.41
ENSCHIG00000009730	P2RY2	purinergic receptor P2Y2 [Source:NCBI gene;Acc:102180611]	0.432	-1.21131	0.00299724	0.0283571	yes	down	4.30833	2.46167
ENSCHIG00000019932		ATP binding cassette subfamily B member 1 [Source:NCBI gene;Acc:102185649]	0.431	-1.21319	8.48455e-05	0.00298404	yes	down	11.1783	4.54333
ENSCHIG00000021284	GPR161	G protein-coupled receptor 161 [Source:NCBI gene;Acc:102187999]	0.431	-1.21374	0.00124594	0.0162212	yes	down	2.18	0.905
ENSCHIG00000021243	NT5C3A	5'-nucleotidase, cytosolic IIIA [Source:NCBI gene;Acc:102169251]	0.431	-1.21413	2.8764e-06	0.000382265	yes	down	22.1717	7.67333
ENSCHIG00000013975	PHC3	polyhomeotic homolog 3 [Source:NCBI gene;Acc:102180082]	0.43	-1.21836	0.00138932	0.0173452	yes	down	3.29333	1.48833
ENSCHIG00000021304	CYP4V2	cytochrome P450 4V2 [Source:NCBI gene;Acc:102188826]	0.428	-1.22459	0.000467666	0.00867293	yes	down	4.43667	1.75167
ENSCHIG00000025456	CASS4	Cas scaffold protein family member 4 [Source:NCBI gene;Acc:102170531]	0.428	-1.22562	0.00272113	0.0266858	yes	down	1.43	0.55
ENSCHIG00000024224	GLIPR1	GLI pathogenesis related 1 [Source:NCBI gene;Acc:102177958]	0.427	-1.22925	9.93589e-05	0.00337535	yes	down	5.64333	2.25333
ENSCHIG00000002641		-	0.423	-1.24228	0.00105649	0.0144911	yes	down	4.50667	1.71333
ENSCHIG00000025945	PLSCR1	phospholipid scramblase 2 [Source:NCBI gene;Acc:102175526]	0.422	-1.24389	0.0002239	0.00561526	yes	down	16.5517	6.10167
ENSCHIG00000017135	IRF4	interferon regulatory factor 4 [Source:NCBI gene;Acc:102182006]	0.421	-1.24924	0.0047555	0.0379738	yes	down	3.07833	1.13833
ENSCHIG00000008732	TNF	tumor necrosis factor [Source:NCBI gene;Acc:100861232]	0.421	-1.24966	0.00202057	0.0220341	yes	down	1.44833	0.533333
ENSCHIG00000013127		ovostatin homolog 2 [Source:NCBI gene;Acc:102175008]	0.42	-1.25239	0.00393325	0.0334133	yes	down	1.29667	0.961667
ENSCHIG00000013682	RSPO3	R-spondin 3 [Source:NCBI gene;Acc:100860772]	0.419	-1.25515	0.00088891	0.0128458	yes	down	0.473333	0.18
ENSCHIG00000012779	GPR183	G-protein coupled receptor 183 [Source:NCBI gene;Acc:102177727]	0.418	-1.2569	0.00161463	0.0192135	yes	down	4.21167	1.6
ENSCHIG00000009920	TET1	tet methylcytosine dioxygenase 1 [Source:NCBI gene;Acc:102186373]	0.418	-1.25901	0.000782264	0.0118971	yes	down	0.371667	0.14
ENSCHIG00000016370	CNTN1	contactin 1 [Source:NCBI gene;Acc:102186933]	0.417	-1.26047	0.000166602	0.00457352	yes	down	0.63	0.235
ENSCHIG00000022485	PTPRC	protein tyrosine phosphatase, receptor type C [Source:NCBI gene;Acc:102173490]	0.416	-1.26369	0.00104591	0.0144116	yes	down	34.0617	11.9933
ENSCHIG00000008723		-	0.416	-1.26382	0.000226045	0.00563924	yes	down	4.03167	1.54667
ENSCHIG00000013642	USP53	ubiquitin specific peptidase 53 [Source:NCBI gene;Acc:102190320]	0.416	-1.26492	2.00487e-07	6.54659e-05	yes	down	4.33167	1.60667
ENSCHIG00000007288	PDE4B	phosphodiesterase 4B [Source:NCBI gene;Acc:102180558]	0.416	-1.26514	0.00115634	0.0154889	yes	down	4.79167	1.83167
ENSCHIG00000002948	CLEC12A	C-type lectin domain family 12 member A [Source:NCBI gene;Acc:102187749]	0.416	-1.26692	0.00142976	0.0176028	yes	down	0.813333	0.311667
ENSCHIG00000023246	NLRP3	NLR family pyrin domain containing 3 [Source:NCBI gene;Acc:102173382]	0.415	-1.27009	0.00676508	0.0470413	yes	down	0.886667	0.351667
ENSCHIG00000024126	KNL1	kinetochore scaffold 1 [Source:HGNC Symbol;Acc:HGNC:24054]	0.414	-1.2716	0.00225288	0.0235906	yes	down	1.91	0.86
ENSCHIG00000016856	TNFSF10	TNF superfamily member 10 [Source:NCBI gene;Acc:102173335]	0.413	-1.27543	0.000417976	0.00808656	yes	down	11.74	3.51
ENSCHIG00000024957		sphingolipid transporter 2 [Source:NCBI gene;Acc:102181430]	0.413	-1.27739	0.00715153	0.0487044	yes	down	28.7333	10.855
ENSCHIG00000022119		regulator of microtubule dynamics 2 [Source:NCBI gene;Acc:102175032]	0.412	-1.2778	0.00015891	0.0044395	yes	down	2.415	0.928333
ENSCHIG00000025307		-	0.412	-1.2805	0.000759722	0.0116154	yes	down	1.44667	0.538333
ENSCHIG00000011120	TIFA	TRAF interacting protein with forkhead associated domain [Source:NCBI gene;Acc:102180472]	0.41	-1.28496	0.000766628	0.0116968	yes	down	2.05333	0.926667
ENSCHIG00000020774		complement factor H [Source:NCBI gene;Acc:102188881]	0.41	-1.28556	3.69318e-05	0.00181093	yes	down	32.6667	11.3233
ENSCHIG00000020076	CD84	CD84 molecule [Source:NCBI gene;Acc:102181453]	0.41	-1.28593	0.00187197	0.0210264	yes	down	4.19167	1.47833
ENSCHIG00000027113	ZNF699	zinc finger protein 699 [Source:NCBI gene;Acc:102176031]	0.409	-1.28915	0.000145812	0.00424886	yes	down	1.06833	0.406667
ENSCHIG00000010398	TMEM144	transmembrane protein 144 [Source:NCBI gene;Acc:102189333]	0.408	-1.29194	0.000662156	0.0107509	yes	down	3.045	1.04
ENSCHIG00000015554	CHST11	carbohydrate sulfotransferase 11 [Source:NCBI gene;Acc:102184407]	0.405	-1.3037	0.00277469	0.0270063	yes	down	2.225	0.836667
ENSCHIG00000027128	LYL1	LYL1, basic helix-loop-helix family member [Source:NCBI gene;Acc:102168994]	0.404	-1.3075	0.000464749	0.00863886	yes	down	2.14	0.831667
ENSCHIG00000000921	NBEAL1	neurobeachin like 1 [Source:NCBI gene;Acc:102176277]	0.403	-1.31006	8.88878e-08	3.94995e-05	yes	down	1.28333	0.47
ENSCHIG00000012208	BIRC3	baculoviral IAP repeat containing 3 [Source:NCBI gene;Acc:102173952]	0.402	-1.31651	4.08631e-06	0.000468607	yes	down	23.895	9.28167
ENSCHIG00000026535	TRANK1	tetratricopeptide repeat and ankyrin repeat containing 1 [Source:NCBI gene;Acc:102182638]	0.4	-1.32216	0.00162095	0.0192242	yes	down	3.89667	1.44667
ENSCHIG00000017676		-	0.399	-1.32715	0.000137276	0.00408382	yes	down	1.21833	0.45
ENSCHIG00000002847		-	0.398	-1.32833	0.00518302	0.0400993	yes	down	2.12	0.768333
ENSCHIG00000018183	RASL10B	RAS like family 10 member B [Source:NCBI gene;Acc:102171814]	0.398	-1.32974	0.00737954	0.0495056	yes	down	14.03	5.24667
ENSCHIG00000022239	IL17A	interleukin 17A [Source:NCBI gene;Acc:100860877]	0.397	-1.33308	0.00521636	0.0402284	yes	down	11.2817	3.82833
ENSCHIG00000012691	TRPA1	transient receptor potential cation channel subfamily A member 1 [Source:NCBI gene;Acc:102170065]	0.396	-1.33489	0.00222093	0.0233938	yes	down	1.36667	0.466667
ENSCHIG00000013056	MAN1A2	mannosidase alpha class 1A member 2 [Source:NCBI gene;Acc:102178963]	0.396	-1.33762	2.73889e-12	7.78941e-09	yes	down	6.05667	2.16667
ENSCHIG00000008729	MCOLN2	mucolipin 2 [Source:NCBI gene;Acc:102186546]	0.394	-1.3433	0.00141861	0.0175333	yes	down	0.373333	0.128333
ENSCHIG00000018431	SASS6	SAS-6 centriolar assembly protein [Source:NCBI gene;Acc:102177856]	0.391	-1.35436	4.33904e-05	0.00202299	yes	down	1.67167	0.606667
ENSCHIG00000023709	DTX3L	deltex E3 ubiquitin ligase 3L [Source:NCBI gene;Acc:102172763]	0.391	-1.35513	7.09184e-05	0.0027629	yes	down	13.4433	4.63833
ENSCHIG00000017677		interferon-activable protein 203 [Source:NCBI gene;Acc:102173932]	0.389	-1.36125	0.001983	0.021778	yes	down	8.74333	2.39667
ENSCHIG00000027141		high affinity immunoglobulin gamma Fc receptor I [Source:NCBI gene;Acc:102173987]	0.389	-1.36207	0.000258924	0.00603062	yes	down	2.19167	0.786667
ENSCHIG00000011154	UBA7	ubiquitin like modifier activating enzyme 7 [Source:NCBI gene;Acc:102176743]	0.388	-1.36692	0.00225137	0.0235906	yes	down	18.5233	6.33833
ENSCHIG00000015942	GCFC2	GC-rich sequence DNA-binding factor 2 [Source:NCBI gene;Acc:102178081]	0.387	-1.36902	4.85787e-05	0.00212486	yes	down	1.34167	0.48
ENSCHIG00000024381	TLL1	tolloid like 1 [Source:NCBI gene;Acc:102168660]	0.386	-1.37235	0.00619824	0.044923	yes	down	35.7617	17.5867
ENSCHIG00000014095	FRMPD1	FERM and PDZ domain containing 1 [Source:NCBI gene;Acc:102189397]	0.384	-1.38042	4.39097e-05	0.00204051	yes	down	2.75333	0.936667
ENSCHIG00000012255	NAV3	neuron navigator 3 [Source:NCBI gene;Acc:102182566]	0.383	-1.38307	0.00456267	0.0368643	yes	down	0.463333	0.17
ENSCHIG00000012062	MFAP3L	microfibril associated protein 3 like [Source:NCBI gene;Acc:102169590]	0.381	-1.39337	0.00157226	0.0188671	yes	down	9.28833	3.21167
ENSCHIG00000012229	MCF2L2	MCF.2 cell line derived transforming sequence-like 2 [Source:NCBI gene;Acc:102184378]	0.378	-1.4042	0.00408977	0.0342317	yes	down	2.71833	0.858333
ENSCHIG00000027184	CD69	CD69 molecule [Source:NCBI gene;Acc:102190494]	0.377	-1.40739	0.00338752	0.0304107	yes	down	0.576667	0.191667
ENSCHIG00000007611	C3AR1	complement C3a receptor 1 [Source:NCBI gene;Acc:102179550]	0.376	-1.41056	0.0039353	0.0334133	yes	down	2.43667	0.843333
ENSCHIG00000012697	TRPM7	transient receptor potential cation channel subfamily M member 7 [Source:NCBI gene;Acc:102173747]	0.376	-1.41249	5.86529e-11	1.19149e-07	yes	down	4.83833	1.655
ENSCHIG00000020185	SIRPB2	signal-regulatory protein beta-2 [Source:NCBI gene;Acc:102172077]	0.375	-1.41444	0.00457634	0.0369537	yes	down	0.3	0.106667
ENSCHIG00000013185	FGL1	fibrinogen like 1 [Source:NCBI gene;Acc:102168604]	0.374	-1.42062	0.00252067	0.0254029	yes	down	0.891667	0.295
ENSCHIG00000020997	FNIP1	folliculin interacting protein 1 [Source:NCBI gene;Acc:102182584]	0.373	-1.42132	8.50117e-11	1.51108e-07	yes	down	7.7	2.62833
ENSCHIG00000007971		-	0.372	-1.42675	0.000374297	0.00756036	yes	down	1.39667	0.495
ENSCHIG00000010589	PIK3CG	phosphatidylinositol-4,5-bisphosphate 3-kinase catalytic subunit gamma [Source:NCBI gene;Acc:102173256]	0.372	-1.42766	5.31427e-05	0.00226934	yes	down	1.475	0.488333
ENSCHIG00000008470	ADAMTS3	ADAM metallopeptidase with thrombospondin type 1 motif 3 [Source:NCBI gene;Acc:102180478]	0.371	-1.43189	0.0009009	0.0129011	yes	down	0.156667	0.055
ENSCHIG00000027096		lysozyme C, milk isozyme [Source:NCBI gene;Acc:102171764]	0.37	-1.43531	0.00048748	0.00882493	yes	down	10575.8	3111.18
ENSCHIG00000017136		ring finger protein 213 [Source:NCBI gene;Acc:102174427]	0.37	-1.4356	2.48327e-06	0.000364042	yes	down	4.925	1.65
ENSCHIG00000013565	CLEC4E	C-type lectin domain family 4 member E [Source:NCBI gene;Acc:102183403]	0.37	-1.43599	0.0051614	0.0399951	yes	down	3.03833	0.988333
ENSCHIG00000019680		-	0.37	-1.43607	3.70914e-05	0.00181251	yes	down	0.425	0.145
ENSCHIG00000023487	EPSTI1	epithelial stromal interaction 1 [Source:NCBI gene;Acc:102177448]	0.367	-1.4477	0.000957081	0.0134749	yes	down	14.3	4.40833
ENSCHIG00000021424	SOAT1	sterol O-acyltransferase 1 [Source:NCBI gene;Acc:102186791]	0.366	-1.44953	0.00139391	0.0173872	yes	down	12.2583	3.48833
ENSCHIG00000017104	SIGLEC1	sialic acid binding Ig like lectin 1 [Source:NCBI gene;Acc:102181404]	0.366	-1.45126	0.00377705	0.0326502	yes	down	6.025	1.96667
ENSCHIG00000007933		-	0.365	-1.45447	0.00294921	0.0281619	yes	down	1.18833	0.488333
ENSCHIG00000006982		complement factor I [Source:NCBI gene;Acc:102183858]	0.365	-1.45542	0.00017972	0.004834	yes	down	1.72833	0.568333
ENSCHIG00000026907	CD8A	CD8a molecule [Source:NCBI gene;Acc:102185010]	0.362	-1.46418	0.00472114	0.037801	yes	down	3.31167	1.065
ENSCHIG00000020327	RIF1	replication timing regulatory factor 1 [Source:NCBI gene;Acc:102183645]	0.362	-1.46445	1.29606e-06	0.000236281	yes	down	1.76833	0.59
ENSCHIG00000002872	STX19	syntaxin 19 [Source:NCBI gene;Acc:102191554]	0.362	-1.46456	0.000571198	0.00968613	yes	down	2.48833	1.05
ENSCHIG00000011345	IRF7	interferon regulatory factor 7 [Source:NCBI gene;Acc:106503773]	0.362	-1.46469	0.00541916	0.0412529	yes	down	21.3917	6.62
ENSCHIG00000016625	TLR8	Capra hircus toll like receptor 8 (TLR8), mRNA. [Source:RefSeq mRNA;Acc:NM_001285757]	0.362	-1.46564	0.00431138	0.0354791	yes	down	1.535	0.488333
ENSCHIG00000007476	RHOH	ras homolog family member H [Source:NCBI gene;Acc:102174643]	0.362	-1.46615	0.00257779	0.0258194	yes	down	2.18833	0.975
ENSCHIG00000012382	CYP1B1	cytochrome P450 1B1 [Source:NCBI gene;Acc:102184252]	0.361	-1.47115	0.0054403	0.0413917	yes	down	11.8283	3.85667
ENSCHIG00000026441	ZNF831	zinc finger protein 831 [Source:NCBI gene;Acc:102175137]	0.36	-1.47589	0.00367637	0.032092	yes	down	0.276667	0.085
ENSCHIG00000015819	ANGPT1	angiopoietin 1 [Source:NCBI gene;Acc:102189773]	0.359	-1.47693	0.000711921	0.0112412	yes	down	7.02833	2.26667
ENSCHIG00000016197	TMPRSS11D	transmembrane serine protease 11D [Source:NCBI gene;Acc:102186382]	0.357	-1.48525	0.000970285	0.0136067	yes	down	68.95	23.57
ENSCHIG00000011885	FCER1A	Fc fragment of IgE receptor Ia [Source:NCBI gene;Acc:102168313]	0.357	-1.48785	0.00265753	0.0263346	yes	down	0.868333	0.285
ENSCHIG00000015046	FAM111B	family with sequence similarity 111 member B [Source:NCBI gene;Acc:102176630]	0.356	-1.49072	0.00521309	0.0402284	yes	down	1.865	0.585
ENSCHIG00000025286		apolipoprotein L3-like [Source:NCBI gene;Acc:102170691]	0.355	-1.49501	0.0018205	0.0207042	yes	down	1.76167	0.541667
ENSCHIG00000014126	SLC10A6	solute carrier family 10 member 6 [Source:NCBI gene;Acc:102185257]	0.353	-1.50285	9.91504e-05	0.00337535	yes	down	1.06667	0.336667
ENSCHIG00000020127	SCN9A	sodium voltage-gated channel alpha subunit 9 [Source:NCBI gene;Acc:102178220]	0.353	-1.50411	0.000528476	0.00928916	yes	down	0.516667	0.173333
ENSCHIG00000015574	FGF7	fibroblast growth factor 7 [Source:NCBI gene;Acc:102178454]	0.351	-1.50904	0.000261082	0.00604585	yes	down	6.85333	1.745
ENSCHIG00000023635	HAPLN1	hyaluronan and proteoglycan link protein 1 [Source:NCBI gene;Acc:102169475]	0.351	-1.51042	0.000162644	0.00451378	yes	down	2.05167	0.68
ENSCHIG00000020143		-	0.351	-1.51056	0.000652813	0.0106579	yes	down	4.32	1.34667
ENSCHIG00000008552	GPR171	G protein-coupled receptor 171 [Source:NCBI gene;Acc:102190267]	0.351	-1.51197	0.00070627	0.0112214	yes	down	1.59667	0.565
ENSCHIG00000014131	BCL2A1	BCL2 related protein A1 [Source:NCBI gene;Acc:102172845]	0.351	-1.51239	0.00185079	0.0209207	yes	down	11.6967	3.50333
ENSCHIG00000000173	TMEM26	transmembrane protein 26 [Source:NCBI gene;Acc:102173813]	0.349	-1.51825	0.00387018	0.033153	yes	down	0.271667	0.09
ENSCHIG00000015726	CD163	scavenger receptor cysteine-rich type 1 protein M130 [Source:NCBI gene;Acc:102183943]	0.347	-1.52889	0.00496278	0.0389679	yes	down	30.965	9.095
ENSCHIG00000022768	CTSS	cathepsin S [Source:NCBI gene;Acc:102183747]	0.346	-1.53114	0.000479109	0.00878075	yes	down	68.3667	19.7183
ENSCHIG00000010379	PTPRO	protein tyrosine phosphatase, receptor type O [Source:NCBI gene;Acc:108636039]	0.346	-1.53274	0.00645225	0.0459091	yes	down	0.343333	0.118333
ENSCHIG00000019740	N4BP2	NEDD4-binding protein 2 [Source:NCBI gene;Acc:102173648]	0.345	-1.53413	5.72836e-07	0.00012342	yes	down	2.96167	0.945
ENSCHIG00000015759	TRIM5	tripartite motif-containing protein 5 [Source:NCBI gene;Acc:102169889]	0.345	-1.53512	2.66001e-06	0.00037573	yes	down	6.2	2.36333
ENSCHIG00000020113	TNFSF8	TNF superfamily member 8 [Source:NCBI gene;Acc:102178908]	0.345	-1.53524	0.00242323	0.024719	yes	down	2.15333	0.653333
ENSCHIG00000006691		-	0.345	-1.53542	0.00402098	0.0338531	yes	down	34.11	10.29
ENSCHIG00000021733		GTPase IMAP family member 8 [Source:NCBI gene;Acc:102187124]	0.344	-1.54025	0.00141539	0.0175321	yes	down	1.54833	0.475
ENSCHIG00000002047	KCNJ2	potassium voltage-gated channel subfamily J member 2 [Source:NCBI gene;Acc:102168940]	0.344	-1.5409	0.000330672	0.00698687	yes	down	1.54167	0.533333
ENSCHIG00000018333	CYTIP	cytohesin 1 interacting protein [Source:NCBI gene;Acc:102175533]	0.344	-1.54156	0.000553418	0.00951506	yes	down	3.925	1.265
ENSCHIG00000006757	SERPINB7	serpin family B member 7 [Source:NCBI gene;Acc:102181089]	0.343	-1.54481	0.00311606	0.029056	yes	down	9.49	2.95667
ENSCHIG00000016700	HMOX1	heme oxygenase 1 [Source:NCBI gene;Acc:100860951]	0.342	-1.54629	0.000489547	0.00883421	yes	down	101.948	31.8367
ENSCHIG00000016319	EIF2AK2	eukaryotic translation initiation factor 2 alpha kinase 2 [Source:NCBI gene;Acc:102171521]	0.341	-1.55309	1.44883e-05	0.0010178	yes	down	11.8383	3.42667
ENSCHIG00000006661	DSC1	desmocollin 1 [Source:NCBI gene;Acc:102183746]	0.34	-1.55789	0.000384441	0.00765652	yes	down	0.403333	0.131667
ENSCHIG00000020304	IL33	interleukin 33 [Source:NCBI gene;Acc:102176795]	0.339	-1.56016	0.000718232	0.0112729	yes	down	12.3633	3.63167
ENSCHIG00000012005	EVI2B	ecotropic viral integration site 2B [Source:NCBI gene;Acc:102182438]	0.338	-1.56592	0.000226661	0.0056447	yes	down	4.89167	1.52333
ENSCHIG00000020358	ANGPTL5	angiopoietin like 5 [Source:NCBI gene;Acc:102175316]	0.338	-1.56603	0.00729139	0.049191	yes	down	0.575	0.188333
ENSCHIG00000016484	PREX2	phosphatidylinositol-3,4,5-trisphosphate dependent Rac exchange factor 2 [Source:NCBI gene;Acc:102175042]	0.336	-1.57482	0.000477009	0.00878075	yes	down	1.75	0.55
ENSCHIG00000017134	DTWD2	DTW domain containing 2 [Source:NCBI gene;Acc:102178532]	0.335	-1.57727	1.44741e-05	0.0010178	yes	down	2.98667	0.84
ENSCHIG00000017585	TRPM2	transient receptor potential cation channel subfamily M member 2 [Source:NCBI gene;Acc:102171382]	0.333	-1.58517	0.00660913	0.0463421	yes	down	1.40167	0.406667
ENSCHIG00000010678	HKDC1	hexokinase domain containing 1 [Source:NCBI gene;Acc:102189736]	0.333	-1.5866	0.00528042	0.0405451	yes	down	0.176667	0.055
ENSCHIG00000013700	ATRX	ATRX, chromatin remodeler [Source:NCBI gene;Acc:102187036]	0.332	-1.59064	7.74415e-06	0.000671474	yes	down	2.105	0.646667
ENSCHIG00000011731	RGS18	regulator of G protein signaling 18 [Source:NCBI gene;Acc:102169783]	0.332	-1.59067	0.000315826	0.00677382	yes	down	0.906667	0.263333
ENSCHIG00000009129		retinoic acid early transcript 1E [Source:NCBI gene;Acc:108636743]	0.329	-1.60229	0.000631566	0.0104066	yes	down	6.645	1.71
ENSCHIG00000008192	KCNA3	potassium voltage-gated channel subfamily A member 3 [Source:NCBI gene;Acc:102183929]	0.328	-1.60798	1.87683e-05	0.00116037	yes	down	1.29333	0.371667
ENSCHIG00000015033		bone marrow stromal cell antigen 2 [Source:NCBI gene;Acc:102173377]	0.325	-1.62004	0.00619253	0.044923	yes	down	14.9	4.845
ENSCHIG00000017503	SLAMF8	SLAM family member 8 [Source:NCBI gene;Acc:102188724]	0.324	-1.62777	0.00594471	0.043868	yes	down	2.16667	0.625
ENSCHIG00000014176	LIF	LIF, interleukin 6 family cytokine [Source:NCBI gene;Acc:102188524]	0.324	-1.62814	0.00426449	0.0352921	yes	down	0.476667	0.145
ENSCHIG00000019913	IRF1	interferon regulatory factor 1 [Source:NCBI gene;Acc:102188583]	0.323	-1.6287	0.000215323	0.00544822	yes	down	26.58	7.41333
ENSCHIG00000026072	SAMSN1	SAM domain, SH3 domain and nuclear localization signals 1 [Source:NCBI gene;Acc:102178857]	0.322	-1.63444	0.000285999	0.00635788	yes	down	4.00333	1.16667
ENSCHIG00000008623	IKZF2	IKAROS family zinc finger 2 [Source:NCBI gene;Acc:102181170]	0.322	-1.63468	0.00639797	0.0457182	yes	down	0.723333	0.243333
ENSCHIG00000001988	ST8SIA4	ST8 alpha-N-acetyl-neuraminide alpha-2,8-sialyltransferase 4 [Source:NCBI gene;Acc:102188403]	0.318	-1.65185	4.09016e-05	0.00195791	yes	down	52.2767	10.5617
ENSCHIG00000014238	IFIT3	interferon induced protein with tetratricopeptide repeats 3 [Source:NCBI gene;Acc:102168968]	0.318	-1.65187	0.00117104	0.0156053	yes	down	27.7417	8.125
ENSCHIG00000004923		protocadherin 20 [Source:NCBI gene;Acc:102168250]	0.317	-1.65548	0.000631294	0.0104066	yes	down	0.24	0.0716667
ENSCHIG00000010992	FAM171B	family with sequence similarity 171 member B [Source:NCBI gene;Acc:102186529]	0.317	-1.65809	4.15168e-05	0.00195806	yes	down	0.743333	0.213333
ENSCHIG00000025371		-	0.317	-1.65827	0.00490375	0.0386923	yes	down	1.66167	0.468333
ENSCHIG00000007402	RIPOR2	RHO family interacting cell polarization regulator 2 [Source:NCBI gene;Acc:102190475]	0.317	-1.65851	0.00374087	0.0324558	yes	down	1.56167	0.443333
ENSCHIG00000008163	ACKR4	atypical chemokine receptor 4 [Source:NCBI gene;Acc:102173693]	0.316	-1.66034	0.00130839	0.0167036	yes	down	2.905	0.806667
ENSCHIG00000010554	HIST1H1T	histone H1t [Source:NCBI gene;Acc:102185617]	0.316	-1.66361	0.00489721	0.0386923	yes	down	2.955	0.808333
ENSCHIG00000007570	GPR34	G protein-coupled receptor 34 [Source:NCBI gene;Acc:102170500]	0.313	-1.67544	0.000121313	0.00374203	yes	down	2.27833	0.71
ENSCHIG00000020710		-	0.312	-1.6823	0.000312399	0.00675125	yes	down	104.997	30.3483
ENSCHIG00000022609	GPNMB	glycoprotein nmb [Source:NCBI gene;Acc:102173634]	0.312	-1.68247	0.00608433	0.0444948	yes	down	35.295	9.44167
ENSCHIG00000019488	CACNA1D	calcium voltage-gated channel subunit alpha1 D [Source:NCBI gene;Acc:102174706]	0.311	-1.68523	0.000747912	0.0115414	yes	down	0.16	0.045
ENSCHIG00000013015		GTPase IMAP family member 8 [Source:NCBI gene;Acc:106503979]	0.311	-1.68551	0.00102817	0.0141948	yes	down	2.22333	0.615
ENSCHIG00000022236	ATP6V0D2	ATPase H+ transporting V0 subunit d2 [Source:NCBI gene;Acc:102172556]	0.31	-1.68996	0.00218615	0.023165	yes	down	1.515	0.426667
ENSCHIG00000026701	SLFN11	schlafen family member 11 [Source:NCBI gene;Acc:102172655]	0.309	-1.69425	0.00556456	0.0418667	yes	down	0.795	0.221667
ENSCHIG00000008042	CTLA4	cytotoxic T-lymphocyte associated protein 4 [Source:NCBI gene;Acc:102179425]	0.308	-1.69696	0.00090055	0.0129011	yes	down	1.37	0.368333
ENSCHIG00000024061		-	0.303	-1.72137	0.00393919	0.0334133	yes	down	724.147	180.587
ENSCHIG00000019158	PIK3C2G	phosphatidylinositol-4-phosphate 3-kinase catalytic subunit type 2 gamma [Source:NCBI gene;Acc:102172975]	0.3	-1.73498	4.19503e-06	0.000473439	yes	down	1.20833	0.326667
ENSCHIG00000021420	SMPDL3A	sphingomyelin phosphodiesterase acid like 3A [Source:NCBI gene;Acc:102191799]	0.298	-1.74422	6.75632e-06	0.00062794	yes	down	7.85	2.21333
ENSCHIG00000019310	EPHB1	EPH receptor B1 [Source:NCBI gene;Acc:102169225]	0.298	-1.74577	0.000220977	0.00556719	yes	down	0.568333	0.156667
ENSCHIG00000019865	SLC9A7	solute carrier family 9 member A7 [Source:NCBI gene;Acc:102172525]	0.298	-1.747	6.08978e-05	0.00248841	yes	down	0.576667	0.153333
ENSCHIG00000013445	MKRN2OS	MKRN2 opposite strand [Source:NCBI gene;Acc:108638621]	0.297	-1.74964	0.0050659	0.0394724	yes	down	0.781667	0.2
ENSCHIG00000001740		interferon-induced very large GTPase 1 [Source:NCBI gene;Acc:102184922]	0.297	-1.75132	5.41748e-05	0.00229366	yes	down	8.04833	1.93167
ENSCHIG00000023989		killer cell lectin-like receptor subfamily B member 1B allele A [Source:NCBI gene;Acc:102190765]	0.297	-1.75171	3.76937e-05	0.00182936	yes	down	1.76833	0.495
ENSCHIG00000004013	TNFSF13B	TNF superfamily member 13b [Source:NCBI gene;Acc:100860848]	0.297	-1.75173	7.86176e-05	0.00286652	yes	down	2.62333	0.78
ENSCHIG00000024423		-	0.295	-1.7618	0.0039922	0.0337109	yes	down	1.92333	0.531667
ENSCHIG00000019906	IDO1	indoleamine 2,3-dioxygenase 1 [Source:NCBI gene;Acc:102184119]	0.294	-1.76688	0.000438382	0.00830065	yes	down	9.03167	2.35
ENSCHIG00000006607	RF00100	-	0.293	-1.77184	0.00154648	0.018668	yes	down	89.2883	23.3483
ENSCHIG00000024322	AOAH	acyloxyacyl hydrolase [Source:NCBI gene;Acc:102189546]	0.291	-1.78248	4.47951e-05	0.00204819	yes	down	2.75333	0.713333
ENSCHIG00000022614		multidrug resistance protein 1 [Source:NCBI gene;Acc:106502019]	0.29	-1.78585	7.73437e-05	0.00284193	yes	down	0.806667	0.215
ENSCHIG00000017521		CD300 molecule like family member f [Source:NCBI gene;Acc:102175056]	0.289	-1.79275	4.18467e-06	0.000473439	yes	down	2.65167	0.671667
ENSCHIG00000011749	KLRK1	NKG2-D type II integral membrane protein [Source:NCBI gene;Acc:102183941]	0.288	-1.79531	0.00575703	0.0429062	yes	down	0.371667	0.176667
ENSCHIG00000008059	P2RY13	purinergic receptor P2Y13 [Source:NCBI gene;Acc:102191278]	0.288	-1.79564	6.20145e-05	0.00251238	yes	down	3.425	0.931667
ENSCHIG00000005302	P2RY6	pyrimidinergic receptor P2Y6 [Source:NCBI gene;Acc:102181799]	0.288	-1.79755	0.00332222	0.0302833	yes	down	1.80833	0.44
ENSCHIG00000019338	ITGA4	integrin subunit alpha 4 [Source:NCBI gene;Acc:102183190]	0.288	-1.79767	0.000504803	0.00899907	yes	down	1.95833	0.508333
ENSCHIG00000020190	EDIL3	EGF like repeats and discoidin domains 3 [Source:NCBI gene;Acc:102169756]	0.286	-1.80538	0.000141554	0.00415889	yes	down	2.08833	0.561667
ENSCHIG00000010170	CEP290	centrosomal protein 290 [Source:NCBI gene;Acc:102170299]	0.286	-1.80576	1.82082e-05	0.00113574	yes	down	1.005	0.316667
ENSCHIG00000014983		-	0.286	-1.8068	0.00161886	0.0192242	yes	down	1359.47	331.295
ENSCHIG00000006887		golgin subfamily A member 6-like protein 6 [Source:NCBI gene;Acc:106501943]	0.285	-1.81155	0.00275706	0.0269083	yes	down	0.666667	0.168333
ENSCHIG00000026454	JCHAIN	joining chain of multimeric IgA and IgM [Source:NCBI gene;Acc:102172880]	0.284	-1.81657	0.000154287	0.00438416	yes	down	25.725	7.56
ENSCHIG00000009303	CLEC7A	C-type lectin domain containing 7A [Source:NCBI gene;Acc:102185903]	0.283	-1.82354	1.35551e-05	0.000965917	yes	down	4.43	1.015
ENSCHIG00000022202		tripartite motif-containing protein 5 [Source:NCBI gene;Acc:102173185]	0.282	-1.82375	0.00299047	0.0283571	yes	down	2.085	0.543333
ENSCHIG00000025031		docosahexaenoic acid omega-hydroxylase CYP4F3-like [Source:NCBI gene;Acc:102181858]	0.281	-1.83312	0.00152717	0.018482	yes	down	8.295	1.86667
ENSCHIG00000025447	ASPA	aspartoacylase [Source:NCBI gene;Acc:102186241]	0.277	-1.85034	0.000155832	0.00440544	yes	down	1.27833	0.31
ENSCHIG00000010163		guanylate-binding protein 6-like [Source:NCBI gene;Acc:108633177]	0.274	-1.8681	3.31618e-05	0.001668	yes	down	4.47833	1.09167
ENSCHIG00000016958	PAPPA	pappalysin 1 [Source:NCBI gene;Acc:102179947]	0.274	-1.86847	6.22751e-06	0.000590368	yes	down	0.935	0.245
ENSCHIG00000024438	PDCD1LG2	programmed cell death 1 ligand 2 [Source:NCBI gene;Acc:102179003]	0.273	-1.87127	0.000192084	0.00500263	yes	down	2.27667	0.598333
ENSCHIG00000013878		CD302 antigen [Source:NCBI gene;Acc:102168948]	0.273	-1.87387	9.63401e-05	0.00330907	yes	down	1.5	0.375
ENSCHIG00000023467		-	0.271	-1.88104	0.00204193	0.022233	yes	down	48.8633	11.645
ENSCHIG00000012833	CYP7B1	25-hydroxycholesterol 7-alpha-hydroxylase [Source:NCBI gene;Acc:102191152]	0.269	-1.89553	1.66577e-05	0.00109233	yes	down	2.35	0.601667
ENSCHIG00000025780		-	0.264	-1.92003	6.44728e-06	0.000607155	yes	down	2.79833	0.805
ENSCHIG00000016137	PARP9	poly(ADP-ribose) polymerase family member 9 [Source:NCBI gene;Acc:102187626]	0.264	-1.92343	3.46375e-08	1.82424e-05	yes	down	14.0967	3.285
ENSCHIG00000006608		lysozyme C, intestinal isozyme [Source:NCBI gene;Acc:108636006]	0.263	-1.92849	7.94264e-05	0.00288352	yes	down	0.861667	0.203333
ENSCHIG00000016267		pepsin A [Source:NCBI gene;Acc:102172792]	0.262	-1.93412	0.00216992	0.0230615	yes	down	0.85	0.2
ENSCHIG00000018377	SEMA3D	semaphorin 3D [Source:NCBI gene;Acc:102181923]	0.26	-1.94332	7.47046e-09	6.24882e-06	yes	down	0.546667	0.128333
ENSCHIG00000020905	C5orf15	chromosome 7 C5orf15 homolog [Source:NCBI gene;Acc:102172992]	0.259	-1.94753	0.00180165	0.0205944	yes	down	10.1483	2.43833
ENSCHIG00000017394	PGLYRP2	peptidoglycan recognition protein 2 [Source:NCBI gene;Acc:102183951]	0.258	-1.95194	0.00347452	0.0308605	yes	down	2.785	0.61
ENSCHIG00000018211	IL22	interleukin 22 [Source:NCBI gene;Acc:100860910]	0.255	-1.97093	0.00011898	0.00369408	yes	down	8.98667	2.045
ENSCHIG00000018265	HTR7	5-hydroxytryptamine receptor 7 [Source:NCBI gene;Acc:102181834]	0.254	-1.97901	0.00155403	0.0187274	yes	down	0.623333	0.153333
ENSCHIG00000017390	IL1RL1	interleukin 1 receptor like 1 [Source:NCBI gene;Acc:102188323]	0.253	-1.98023	0.0002212	0.00556719	yes	down	0.603333	0.148333
ENSCHIG00000015403	CXCL10	C-X-C motif chemokine ligand 10 [Source:NCBI gene;Acc:100860873]	0.252	-1.99023	0.000254539	0.00600164	yes	down	9.74667	2.13833
ENSCHIG00000025730		chromosome 3 C1orf162 homolog [Source:NCBI gene;Acc:102178230]	0.251	-1.99677	0.007009	0.0480559	yes	down	17.1217	4.13167
ENSCHIG00000026203		-	0.25	-1.99984	0.00167942	0.0196742	yes	down	161.763	34.5667
ENSCHIG00000023775	MRC1	mannose receptor C-type 1 [Source:NCBI gene;Acc:102181218]	0.249	-2.00438	8.46221e-05	0.00298404	yes	down	17.49	4.03667
ENSCHIG00000012189	SAMD8	sterile alpha motif domain containing 8 [Source:NCBI gene;Acc:102168888]	0.249	-2.00565	0.000750203	0.0115453	yes	down	18.1533	4.28167
ENSCHIG00000022636	MMRN1	multimerin 1 [Source:NCBI gene;Acc:102168899]	0.248	-2.01098	1.80552e-05	0.00113574	yes	down	3.12333	0.738333
ENSCHIG00000023120	EXPH5	exophilin 5 [Source:NCBI gene;Acc:108633290]	0.248	-2.01411	8.9799e-12	2.12824e-08	yes	down	6.31167	1.36833
ENSCHIG00000009322	HGF	hepatocyte growth factor [Source:NCBI gene;Acc:102183288]	0.247	-2.01975	6.08028e-05	0.00248841	yes	down	1.09167	0.263333
ENSCHIG00000014141		-	0.246	-2.02592	1.47988e-06	0.000259801	yes	down	3.89333	0.893333
ENSCHIG00000012101		C-X-C motif chemokine receptor 1 [Source:NCBI gene;Acc:102189634]	0.242	-2.04878	0.00651178	0.0460684	yes	down	1.85667	0.426667
ENSCHIG00000024144		complement C3d receptor 2 [Source:NCBI gene;Acc:102186615]	0.24	-2.05627	7.12487e-05	0.00276563	yes	down	5.97333	1.33833
ENSCHIG00000013289		interferon-induced very large GTPase 1-like [Source:NCBI gene;Acc:102175225]	0.238	-2.0706	0.000426952	0.00820227	yes	down	3.205	0.803333
ENSCHIG00000016932	IL12B	interleukin 12B [Source:NCBI gene;Acc:100860845]	0.237	-2.07687	0.002715	0.0266526	yes	down	0.185	0.0533333
ENSCHIG00000020420	CLDN16	claudin 16 [Source:NCBI gene;Acc:102189431]	0.237	-2.07763	0.00321381	0.0296371	yes	down	0.786667	0.245
ENSCHIG00000013100	KRT23	keratin 23 [Source:NCBI gene;Acc:102169416]	0.236	-2.08471	1.60589e-05	0.00108226	yes	down	44.99	9.47
ENSCHIG00000008238		low affinity immunoglobulin gamma Fc region receptor III [Source:NCBI gene;Acc:102185698]	0.234	-2.09765	6.91354e-06	0.000630196	yes	down	14.7483	3.08833
ENSCHIG00000026175		-	0.232	-2.10569	3.49057e-05	0.00173552	yes	down	7.795	1.665
ENSCHIG00000019892	OAS1	2'-5'-oligoadenylate synthase 1 [Source:NCBI gene;Acc:102190983]	0.229	-2.12655	7.65879e-05	0.00282878	yes	down	69.8767	13.97
ENSCHIG00000017335	CD274	CD274 molecule [Source:NCBI gene;Acc:102179284]	0.229	-2.12964	5.65929e-05	0.00236691	yes	down	6.41167	1.44167
ENSCHIG00000001865	MX1	MX dynamin like GTPase 1 [Source:NCBI gene;Acc:102188635]	0.227	-2.14017	2.27745e-05	0.0013306	yes	down	85.5233	17.005
ENSCHIG00000016591		solute carrier family 23 member 1 [Source:NCBI gene;Acc:102175184]	0.227	-2.14043	0.00484502	0.0384251	yes	down	0.398333	0.0866667
ENSCHIG00000022069	ARG1	arginase 1 [Source:NCBI gene;Acc:100860853]	0.226	-2.14468	0.00337037	0.0303718	yes	down	67.595	13.7933
ENSCHIG00000017038		-	0.223	-2.16258	5.18047e-06	0.000525675	yes	down	9.21667	1.855
ENSCHIG00000011445		-	0.222	-2.17028	4.85865e-05	0.00212486	yes	down	18.1617	3.5
ENSCHIG00000021612	BATF2	basic leucine zipper ATF-like transcription factor 2 [Source:NCBI gene;Acc:102185812]	0.221	-2.17772	0.000266224	0.00607151	yes	down	1.01833	0.201667
ENSCHIG00000019858	RAB39A	RAB39A, member RAS oncogene family [Source:NCBI gene;Acc:102189974]	0.221	-2.17918	1.3567e-05	0.000965917	yes	down	0.203333	0.0433333
ENSCHIG00000017063	IFIT2	interferon induced protein with tetratricopeptide repeats 2 [Source:HGNC Symbol;Acc:HGNC:5409]	0.221	-2.17962	0.000302587	0.00663481	yes	down	4.90333	1.01333
ENSCHIG00000015181	TMPRSS11F	transmembrane protease serine 11F [Source:NCBI gene;Acc:102185449]	0.221	-2.18028	6.86794e-05	0.0026926	yes	down	6.46333	1.77833
ENSCHIG00000022954	HERC6	HECT and RLD domain containing E3 ubiquitin protein ligase family member 6 [Source:NCBI gene;Acc:102189747]	0.219	-2.18885	0.000265705	0.00607151	yes	down	3.86833	0.771667
ENSCHIG00000012445		-	0.218	-2.19632	0.00115506	0.0154889	yes	down	61.17	11.3883
ENSCHIG00000018391	PARP14	poly(ADP-ribose) polymerase family member 14 [Source:NCBI gene;Acc:102188085]	0.218	-2.20048	3.19611e-07	8.61393e-05	yes	down	8.70167	1.705
ENSCHIG00000021581	PROX1	prospero homeobox 1 [Source:NCBI gene;Acc:102180144]	0.217	-2.20101	0.00331057	0.0302456	yes	down	0.61	0.126667
ENSCHIG00000007683	SAMD9	sterile alpha motif domain containing 9 [Source:NCBI gene;Acc:102180452]	0.215	-2.21867	2.12943e-08	1.32322e-05	yes	down	10.5333	1.92
ENSCHIG00000012790	CMPK2	cytidine/uridine monophosphate kinase 2 [Source:NCBI gene;Acc:102189688]	0.212	-2.24062	0.00022293	0.00560082	yes	down	7.695	1.57
ENSCHIG00000013803		CD36-like protein [Source:NCBI gene;Acc:100860959]	0.209	-2.26118	6.6269e-05	0.00262811	yes	down	0.471667	0.09
ENSCHIG00000017674	PLEK	pleckstrin [Source:NCBI gene;Acc:102182882]	0.208	-2.26463	7.26408e-05	0.00277264	yes	down	16.9317	2.90333
ENSCHIG00000014526	ISG20	interferon stimulated exonuclease gene 20 [Source:NCBI gene;Acc:102177100]	0.207	-2.27444	0.00647647	0.0459606	yes	down	18.8467	3.65
ENSCHIG00000006768	CSF3R	colony stimulating factor 3 receptor [Source:NCBI gene;Acc:102175546]	0.207	-2.2751	0.00169005	0.0197312	yes	down	3.13667	0.485
ENSCHIG00000026649	MMP12	matrix metallopeptidase 12 [Source:NCBI gene;Acc:102170339]	0.205	-2.28303	0.000217417	0.00549143	yes	down	0.453333	0.085
ENSCHIG00000016815	PLCXD3	phosphatidylinositol specific phospholipase C X domain containing 3 [Source:NCBI gene;Acc:102179239]	0.205	-2.28731	0.00461165	0.0370705	yes	down	0.956667	0.17
ENSCHIG00000020074	CCL8	C-C motif chemokine 8 [Source:NCBI gene;Acc:102174969]	0.202	-2.30652	0.00042215	0.00815621	yes	down	5.15333	0.928333
ENSCHIG00000009663		interferon-induced very large GTPase 1-like [Source:NCBI gene;Acc:108633278]	0.197	-2.34029	0.000149292	0.00429744	yes	down	5.73667	1.04667
ENSCHIG00000024954		SLAM family member 6 [Source:NCBI gene;Acc:102181738]	0.195	-2.35573	0.00170029	0.0197984	yes	down	0.721667	0.118333
ENSCHIG00000024071		growth-regulated alpha protein-like [Source:NCBI gene;Acc:102182683]	0.194	-2.36394	0.00119293	0.015799	yes	down	6.64833	1.375
ENSCHIG00000015496		-	0.193	-2.37498	1.88616e-06	0.000307545	yes	down	59.4367	9.565
ENSCHIG00000017969	DHRS9	dehydrogenase/reductase 9 [Source:NCBI gene;Acc:102173975]	0.191	-2.38722	0.00471421	0.0377785	yes	down	7.805	1.405
ENSCHIG00000015374	F5	coagulation factor V [Source:NCBI gene;Acc:102190058]	0.191	-2.39079	0.00582479	0.0432751	yes	down	0.713333	0.128333
ENSCHIG00000001685		-	0.187	-2.42165	3.46987e-06	0.000429057	yes	down	2.25667	0.378333
ENSCHIG00000018536	IFI44L	interferon induced protein 44 like [Source:NCBI gene;Acc:102188998]	0.187	-2.42178	3.96371e-06	0.000465817	yes	down	9.21833	1.68333
ENSCHIG00000013725		-	0.187	-2.42211	1.67824e-06	0.000280759	yes	down	174.337	22.22
ENSCHIG00000011562	OLR1	oxidized low density lipoprotein receptor 1 [Source:NCBI gene;Acc:102185442]	0.185	-2.43711	0.0005046	0.00899907	yes	down	1.69833	0.29
ENSCHIG00000019848	IFIH1	interferon induced with helicase C domain 1 [Source:NCBI gene;Acc:102183188]	0.184	-2.44392	1.05837e-10	1.67222e-07	yes	down	8.95167	1.495
ENSCHIG00000020407	XAF1	XIAP associated factor 1 [Source:NCBI gene;Acc:102190635]	0.182	-2.45919	7.30534e-05	0.00277264	yes	down	9.94	1.57333
ENSCHIG00000018155	IGSF6	immunoglobulin superfamily member 6 [Source:NCBI gene;Acc:102169243]	0.181	-2.46436	0.000342766	0.00715522	yes	down	1.5	0.26
ENSCHIG00000015458	CCL20	C-C motif chemokine ligand 20 [Source:NCBI gene;Acc:102170644]	0.173	-2.52766	2.319e-05	0.0013306	yes	down	19.665	3.415
ENSCHIG00000027159	SLC26A3	solute carrier family 26 member 3 [Source:NCBI gene;Acc:102176093]	0.17	-2.56031	0.00152351	0.0184595	yes	down	56.5867	9.31333
ENSCHIG00000012989	CRISP3	cysteine-rich secretory protein 3 [Source:NCBI gene;Acc:100860899]	0.169	-2.56865	0.000627553	0.0103765	yes	down	113.535	16.7717
ENSCHIG00000007760	LIPN	lipase family member N [Source:NCBI gene;Acc:108633222]	0.168	-2.57012	0.0028214	0.0272742	yes	down	24.6917	4.72667
ENSCHIG00000021716		receptor transporter protein 4 [Source:NCBI gene;Acc:102170912]	0.167	-2.58103	1.18019e-05	0.000892676	yes	down	2.13333	0.318333
ENSCHIG00000013863		CMRF35-like molecule 4 [Source:NCBI gene;Acc:102188629]	0.165	-2.59614	0.000150299	0.0043003	yes	down	0.536667	0.085
ENSCHIG00000025883	DDX58	DExD/H-box helicase 58 [Source:NCBI gene;Acc:102183788]	0.164	-2.60715	2.13348e-05	0.00126409	yes	down	5.315	0.771667
ENSCHIG00000006747		Z-DNA binding protein 1 [Source:NCBI gene;Acc:102168464]	0.16	-2.64101	0.000484592	0.00881189	yes	down	1.86833	0.235
ENSCHIG00000007350		-	0.154	-2.69996	0.000707658	0.011225	yes	down	0.695	0.121667
ENSCHIG00000020926		guanylate-binding protein 1 [Source:NCBI gene;Acc:102170144]	0.152	-2.72014	7.15678e-06	0.00064411	yes	down	46.5783	6.275
ENSCHIG00000012676	IFI44	interferon induced protein 44 [Source:NCBI gene;Acc:102174179]	0.152	-2.7204	4.93779e-05	0.0021342	yes	down	2.54333	0.371667
ENSCHIG00000018522	C1QL2	complement C1q like 2 [Source:NCBI gene;Acc:102176742]	0.151	-2.72671	0.00166298	0.019592	yes	down	0.136667	0.0183333
ENSCHIG00000012064	CHI3L2	chitinase 3 like 2 [Source:NCBI gene;Acc:102181178]	0.151	-2.72898	0.00024718	0.00593733	yes	down	29.6717	4.07167
ENSCHIG00000018576	FAM71F2	family with sequence similarity 71 member F2 [Source:NCBI gene;Acc:102173914]	0.143	-2.80325	0.000963097	0.0135195	yes	down	1.405	0.183333
ENSCHIG00000021584		MEFV, pyrin innate immunity regulator [Source:NCBI gene;Acc:102186453]	0.143	-2.80407	0.000264667	0.00607151	yes	down	2.16833	0.303333
ENSCHIG00000000400		GTPase IMAP family member 7-like [Source:NCBI gene;Acc:108635399]	0.14	-2.83164	1.81251e-05	0.00113574	yes	down	1.79167	0.221667
ENSCHIG00000014078		-	0.136	-2.8826	0.000366791	0.00747437	yes	down	1.55333	0.216667
ENSCHIG00000009419		-	0.131	-2.9292	0.000147879	0.00428277	yes	down	41.0733	4.38333
ENSCHIG00000021250	CLEC4F	C-type lectin domain family 4 member F [Source:HGNC Symbol;Acc:HGNC:25357]	0.128	-2.96389	2.67447e-06	0.00037573	yes	down	2.815	0.36
ENSCHIG00000023778		2'-5'-oligoadenylate synthase 2 [Source:NCBI gene;Acc:102186893]	0.123	-3.0205	9.52669e-05	0.00329298	yes	down	0.516667	0.0683333
ENSCHIG00000012142		guanylate-binding protein 4 [Source:NCBI gene;Acc:102181554]	0.116	-3.1102	4.79592e-06	0.00050517	yes	down	2.87667	0.245
ENSCHIG00000018974	LRP2	LDL receptor related protein 2 [Source:NCBI gene;Acc:102190361]	0.114	-3.12785	0.000555133	0.00951506	yes	down	0.0583333	0.005
ENSCHIG00000019912	SLC25A34	solute carrier family 25 member 34 [Source:NCBI gene;Acc:102173215]	0.111	-3.17367	0.000526012	0.00925729	yes	down	4.845	0.51
ENSCHIG00000014586		-	0.091	-3.46362	0.000152344	0.00435007	yes	down	24.6517	1.93
ENSCHIG00000005102		trichohyalin [Source:NCBI gene;Acc:102188454]	0.089	-3.49283	0.000179358	0.004834	yes	down	24.6317	1.85333
ENSCHIG00000014150	MX2	MX dynamin like GTPase 2 [Source:NCBI gene;Acc:108636422]	0.084	-3.57916	1.83551e-05	0.00113978	yes	down	12.7617	0.913333
ENSCHIG00000017750	ACP7	acid phosphatase 7, tartrate resistant (putative) [Source:NCBI gene;Acc:102181710]	0.08	-3.6415	7.26778e-06	0.000644419	yes	down	0.481667	0.0366667
ENSCHIG00000021832	RSAD2	radical S-adenosyl methionine domain containing 2 [Source:NCBI gene;Acc:102190797]	0.072	-3.79064	1.20843e-09	1.22742e-06	yes	down	17.4283	1.17333
ENSCHIG00000004393		-	0.068	-3.88093	0.00011097	0.00355526	yes	down	1.17	0.0733333
ENSCHIG00000010836	OR4N5	olfactory receptor 4N5 [Source:NCBI gene;Acc:102186211]	0.067	-3.89186	0.00035819	0.0073605	yes	down	0.883333	0.0616667
ENSCHIG00000003279	ESM1	endothelial cell specific molecule 1 [Source:NCBI gene;Acc:102168666]	0.066	-3.91432	1.60657e-08	1.08788e-05	yes	down	1.97333	0.128333
ENSCHIG00000023330	CAPN14	calpain 14 [Source:HGNC Symbol;Acc:HGNC:16664]	0.065	-3.93965	0.000790881	0.0119515	yes	down	0.543333	0.0316667
ENSCHIG00000023910	GBP2	guanylate binding protein 2 [Source:HGNC Symbol;Acc:HGNC:4183]	0.057	-4.13632	4.40952e-06	0.000479695	yes	down	3.84833	0.198333
ENSCHIG00000016166		-	0.057	-4.13653	0.000199256	0.00513302	yes	down	1.14667	0.0583333
ENSCHIG00000007867		epithelial chloride channel protein-like [Source:NCBI gene;Acc:102185237]	0.034	-4.86226	0.00014394	0.00421661	yes	down	4.89167	0.178333
ENSCHIG00000023870	KPRP	keratinocyte proline rich protein [Source:NCBI gene;Acc:102185797]	0.007	-7.11753	1.37628e-07	5.28936e-05	yes	down	0.67	0
ENSCHIG00000006581		-	0	-22.5208	6.62533e-14	2.3553e-10	yes	down	8.18	0
