# Supplementary material for: Differentially Expressed Genes and Signalling Pathways Regulated by High Selenium Involved in Antioxidant and Immune Functions of Goats Based on Transcriptome Sequencing
Source: Int J Mol Sci. 2023 Jan 6;24(2):1124. doi: 10.3390/ijms24021124 (PMC9864924; doi:10.3390/ijms24021124)
Supplement: Supplementary file 1 [file ijms-24-01124-s001.zip › Table S4. The Kyoto Encyclopedia of Genes and Genomes pathway enrichment.xlsx]

## Sheet: Sheet1
Table S3. The Kyoto Encyclopedia of Genes and Genomes pathway enrichment
Num	Pathway id	Description	Database	Ratio_in_study	Ratio_in_pop	Pvalue	Padjust	First Category	Second Category
23	map04621	NOD-like receptor signaling pathway	KEGG PATHWAY	23/383	200/17274	1.12733e-10	2.78451e-08	Organismal Systems	Immune system
19	map05164	Influenza A	KEGG PATHWAY	19/383	221/17274	5.18525e-07	6.40379e-05	Human Diseases	Infectious disease: viral
24	map04060	Cytokine-cytokine receptor interaction	KEGG PATHWAY	24/383	352/17274	1.20288e-06	9.90371e-05	Environmental Information Processing	Signaling molecules and interaction
13	map04640	Hematopoietic cell lineage	KEGG PATHWAY	13/383	119/17274	2.38818e-06	0.00014747	Organismal Systems	Immune system
8	map05143	African trypanosomiasis	KEGG PATHWAY	8/383	51/17274	1.50212e-05	0.000742048	Human Diseases	Infectious disease: parasitic
11	map04061	Viral protein interaction with cytokine and cytokine receptor	KEGG PATHWAY	11/383	115/17274	4.99096e-05	0.0017611	Environmental Information Processing	Signaling molecules and interaction
15	map04145	Phagosome	KEGG PATHWAY	15/383	201/17274	4.3942e-05	0.00180894	Cellular Processes	Transport and catabolism
13	map05323	Rheumatoid arthritis	KEGG PATHWAY	13/383	165/17274	8.12368e-05	0.00250819	Human Diseases	Immune disease
10	map05140	Leishmaniasis	KEGG PATHWAY	10/383	105/17274	0.000113375	0.00280035	Human Diseases	Infectious disease: parasitic
15	map05152	Tuberculosis	KEGG PATHWAY	15/383	217/17274	0.000104805	0.00287631	Human Diseases	Infectious disease: bacterial
14	map04217	Necroptosis	KEGG PATHWAY	14/383	219/17274	0.000394748	0.00886388	Cellular Processes	Cell growth and death
10	map04668	TNF signaling pathway	KEGG PATHWAY	10/383	126/17274	0.000502369	0.0103404	Environmental Information Processing	Signal transduction
11	map04064	NF-kappa B signaling pathway	KEGG PATHWAY	11/383	166/17274	0.00121315	0.0176263	Environmental Information Processing	Signal transduction
8	map04657	IL-17 signaling pathway	KEGG PATHWAY	8/383	94/17274	0.00114945	0.0177446	Organismal Systems	Immune system
12	map05160	Hepatitis C	KEGG PATHWAY	12/383	190/17274	0.00112132	0.0184644	Human Diseases	Infectious disease: viral
7	map04623	Cytosolic DNA-sensing pathway	KEGG PATHWAY	7/383	72/17274	0.00106497	0.018789	Organismal Systems	Immune system
8	map05134	Legionellosis	KEGG PATHWAY	8/383	92/17274	0.000998602	0.0189734	Human Diseases	Infectious disease: bacterial
11	map05146	Amoebiasis	KEGG PATHWAY	11/383	170/17274	0.00146969	0.0201674	Human Diseases	Infectious disease: parasitic
8	map04625	C-type lectin receptor signaling pathway	KEGG PATHWAY	8/383	106/17274	0.00247719	0.0322034	Organismal Systems	Immune system
7	map04662	B cell receptor signaling pathway	KEGG PATHWAY	7/383	87/17274	0.00318547	0.0374672	Organismal Systems	Immune system
12	map05162	Measles	KEGG PATHWAY	12/383	215/17274	0.00315521	0.0389669	Human Diseases	Infectious disease: viral
10	map05150	Staphylococcus aureus infection	KEGG PATHWAY	10/383	169/17274	0.00451821	0.0507272	Human Diseases	Infectious disease: bacterial
8	map05414	Dilated cardiomyopathy (DCM)	KEGG PATHWAY	8/383	127/17274	0.0073915	0.0793783	Human Diseases	Cardiovascular disease
7	map04610	Complement and coagulation cascades	KEGG PATHWAY	7/383	105/17274	0.00886113	0.0810629	Organismal Systems	Immune system
5	map04979	Cholesterol metabolism	KEGG PATHWAY	5/383	56/17274	0.0078979	0.0812826	Organismal Systems	Digestive system
6	map04664	Fc epsilon RI signaling pathway	KEGG PATHWAY	6/383	80/17274	0.00865915	0.0822619	Organismal Systems	Immune system
7	map04622	RIG-I-like receptor signaling pathway	KEGG PATHWAY	7/383	104/17274	0.00842601	0.0832489	Organismal Systems	Immune system
13	map05132	Salmonella infection	KEGG PATHWAY	13/383	293/17274	0.0140965	0.124351	Human Diseases	Infectious disease: bacterial
7	map04620	Toll-like receptor signaling pathway	KEGG PATHWAY	7/383	116/17274	0.0147948	0.126011	Organismal Systems	Immune system
7	map04666	Fc gamma R-mediated phagocytosis	KEGG PATHWAY	7/383	119/17274	0.0168125	0.138423	Organismal Systems	Immune system
3	map04977	Vitamin digestion and absorption	KEGG PATHWAY	3/383	27/17274	0.0213304	0.169955	Organismal Systems	Digestive system
6	map05144	Malaria	KEGG PATHWAY	6/383	102/17274	0.0259877	0.194514	Human Diseases	Infectious disease: parasitic
20	map05168	Herpes simplex virus 1 infection	KEGG PATHWAY	20/383	564/17274	0.0269774	0.195983	Human Diseases	Infectious disease: viral
7	map04380	Osteoclast differentiation	KEGG PATHWAY	7/383	130/17274	0.0258711	0.199692	Organismal Systems	Development and regeneration
3	map00592	alpha-Linolenic acid metabolism	KEGG PATHWAY	3/383	31/17274	0.030728	0.216852	Metabolism	Lipid metabolism
8	map04072	Phospholipase D signaling pathway	KEGG PATHWAY	8/383	167/17274	0.0329288	0.225928	Environmental Information Processing	Signal transduction
9	map04062	Chemokine signaling pathway	KEGG PATHWAY	9/383	203/17274	0.0375591	0.226271	Organismal Systems	Immune system
5	map04924	Renin secretion	KEGG PATHWAY	5/383	81/17274	0.0339789	0.226832	Organismal Systems	Endocrine system
6	map05410	Hypertrophic cardiomyopathy (HCM)	KEGG PATHWAY	6/383	111/17274	0.0371396	0.229337	Human Diseases	Cardiovascular disease
5	map05133	Pertussis	KEGG PATHWAY	5/383	82/17274	0.0355537	0.231099	Human Diseases	Infectious disease: bacterial
5	map00562	Inositol phosphate metabolism	KEGG PATHWAY	5/383	82/17274	0.0355537	0.231099	Metabolism	Carbohydrate metabolism
6	map05321	Inflammatory bowel disease (IBD)	KEGG PATHWAY	6/383	116/17274	0.044481	0.255507	Human Diseases	Immune disease
12	map05169	Epstein-Barr virus infection	KEGG PATHWAY	12/383	310/17274	0.0443741	0.260962	Human Diseases	Infectious disease: viral
8	map04650	Natural killer cell mediated cytotoxicity	KEGG PATHWAY	8/383	197/17274	0.0727092	0.408163	Organismal Systems	Immune system
3	map00250	Alanine, aspartate and glutamate metabolism	KEGG PATHWAY	3/383	46/17274	0.0816718	0.429211	Metabolism	Amino acid metabolism
12	map04010	MAPK signaling pathway	KEGG PATHWAY	12/383	345/17274	0.0838292	0.431371	Environmental Information Processing	Signal transduction
7	map04921	Oxytocin signaling pathway	KEGG PATHWAY	7/383	168/17274	0.0807418	0.433548	Organismal Systems	Endocrine system
6	map05145	Toxoplasmosis	KEGG PATHWAY	6/383	135/17274	0.0801834	0.440118	Human Diseases	Infectious disease: parasitic
1	map00524	Neomycin, kanamycin and gentamicin biosynthesis	KEGG PATHWAY	1/383	5/17274	0.106064	0.494297	Metabolism	Biosynthesis of other secondary metabolites
3	map04930	Type II diabetes mellitus	KEGG PATHWAY	3/383	52/17274	0.108184	0.49484	Human Diseases	Endocrine and metabolic disease
3	map04973	Carbohydrate digestion and absorption	KEGG PATHWAY	3/383	50/17274	0.0990068	0.499075	Organismal Systems	Digestive system
4	map05120	Epithelial cell signaling in Helicobacter pylori infection	KEGG PATHWAY	4/383	81/17274	0.105417	0.500733	Human Diseases	Infectious disease: bacterial
5	map04970	Salivary secretion	KEGG PATHWAY	5/383	112/17274	0.103678	0.502128	Organismal Systems	Digestive system
9	map04514	Cell adhesion molecules (CAMs)	KEGG PATHWAY	9/383	254/17274	0.113173	0.508248	Environmental Information Processing	Signaling molecules and interaction
10	map05130	Pathogenic Escherichia coli infection	KEGG PATHWAY	10/383	285/17274	0.103447	0.511028	Human Diseases	Infectious disease: bacterial
6	map04270	Vascular smooth muscle contraction	KEGG PATHWAY	6/383	150/17274	0.117049	0.516271	Organismal Systems	Circulatory system
5	map04750	Inflammatory mediator regulation of TRP channels	KEGG PATHWAY	5/383	119/17274	0.125166	0.533035	Organismal Systems	Sensory system
9	map05205	Proteoglycans in cancer	KEGG PATHWAY	9/383	259/17274	0.123345	0.534493	Human Diseases	Cancer: overview
4	map05310	Asthma	KEGG PATHWAY	4/383	87/17274	0.127707	0.534639	Human Diseases	Immune disease
4	map03320	PPAR signaling pathway	KEGG PATHWAY	4/383	89/17274	0.135543	0.557985	Organismal Systems	Endocrine system
2	map00534	Glycosaminoglycan biosynthesis - heparan sulfate / heparin	KEGG PATHWAY	2/383	30/17274	0.14237	0.576484	Metabolism	Glycan biosynthesis and metabolism
6	map00230	Purine metabolism	KEGG PATHWAY	6/383	165/17274	0.160953	0.641216	Metabolism	Nucleotide metabolism
9	map04020	Calcium signaling pathway	KEGG PATHWAY	9/383	278/17274	0.166233	0.651739	Environmental Information Processing	Signal transduction
2	map00500	Starch and sucrose metabolism	KEGG PATHWAY	2/383	34/17274	0.173624	0.670082	Metabolism	Carbohydrate metabolism
2	map01040	Biosynthesis of unsaturated fatty acids	KEGG PATHWAY	2/383	35/17274	0.181604	0.67964	Metabolism	Lipid metabolism
3	map00240	Pyrimidine metabolism	KEGG PATHWAY	3/383	66/17274	0.180232	0.684883	Metabolism	Nucleotide metabolism
4	map04361	Axon regeneration	KEGG PATHWAY	4/383	101/17274	0.186265	0.686677	Organismal Systems	Development and regeneration
4	map04978	Mineral absorption	KEGG PATHWAY	4/383	102/17274	0.190744	0.692851	Organismal Systems	Digestive system
3	map00480	Glutathione metabolism	KEGG PATHWAY	3/383	69/17274	0.197079	0.705487	Metabolism	Metabolism of other amino acids
3	map04920	Adipocytokine signaling pathway	KEGG PATHWAY	3/383	72/17274	0.214288	0.725057	Organismal Systems	Endocrine system
3	map04927	Cortisol synthesis and secretion	KEGG PATHWAY	3/383	71/17274	0.208515	0.725398	Organismal Systems	Endocrine system
3	map05221	Acute myeloid leukemia	KEGG PATHWAY	3/383	71/17274	0.208515	0.725398	Human Diseases	Cancer: specific types
6	map04261	Adrenergic signaling in cardiomyocytes	KEGG PATHWAY	6/383	182/17274	0.217859	0.727179	Organismal Systems	Circulatory system
5	map05340	Primary immunodeficiency	KEGG PATHWAY	5/383	142/17274	0.20793	0.733694	Human Diseases	Immune disease
4	map00590	Arachidonic acid metabolism	KEGG PATHWAY	4/383	109/17274	0.222989	0.734378	Metabolism	Lipid metabolism
4	map04672	Intestinal immune network for IgA production	KEGG PATHWAY	4/383	110/17274	0.227709	0.740056	Organismal Systems	Immune system
4	map04925	Aldosterone synthesis and secretion	KEGG PATHWAY	4/383	112/17274	0.237224	0.75121	Organismal Systems	Endocrine system
3	map02010	ABC transporters	KEGG PATHWAY	3/383	77/17274	0.243618	0.75217	Environmental Information Processing	Membrane transport
6	map05135	Yersinia infection	KEGG PATHWAY	6/383	187/17274	0.235771	0.756303	Human Diseases	Infectious disease: bacterial
6	map04210	Apoptosis	KEGG PATHWAY	6/383	189/17274	0.24306	0.759947	Cellular Processes	Cell growth and death
3	map04918	Thyroid hormone synthesis	KEGG PATHWAY	3/383	80/17274	0.261514	0.768977	Organismal Systems	Endocrine system
4	map04972	Pancreatic secretion	KEGG PATHWAY	4/383	116/17274	0.256522	0.772695	Organismal Systems	Digestive system
4	map05412	Arrhythmogenic right ventricular cardiomyopathy (ARVC)	KEGG PATHWAY	4/383	116/17274	0.256522	0.772695	Human Diseases	Cardiovascular disease
2	map00591	Linoleic acid metabolism	KEGG PATHWAY	2/383	44/17274	0.255115	0.777945	Metabolism	Lipid metabolism
4	map04512	ECM-receptor interaction	KEGG PATHWAY	4/383	119/17274	0.271197	0.788066	Environmental Information Processing	Signaling molecules and interaction
7	map05167	Kaposi sarcoma-associated herpesvirus infection	KEGG PATHWAY	7/383	238/17274	0.27727	0.796345	Human Diseases	Infectious disease: viral
4	map05330	Allograft rejection	KEGG PATHWAY	4/383	123/17274	0.290978	0.82611	Human Diseases	Immune disease
9	map05131	Shigellosis	KEGG PATHWAY	9/383	327/17274	0.301919	0.837911	Human Diseases	Infectious disease: bacterial
5	map04611	Platelet activation	KEGG PATHWAY	5/383	164/17274	0.299345	0.840207	Organismal Systems	Immune system
11	map05165	Human papillomavirus infection	KEGG PATHWAY	11/383	418/17274	0.324055	0.851506	Human Diseases	Infectious disease: viral
2	map04340	Hedgehog signaling pathway	KEGG PATHWAY	2/383	52/17274	0.32099	0.852523	Environmental Information Processing	Signal transduction
4	map04725	Cholinergic synapse	KEGG PATHWAY	4/383	127/17274	0.310946	0.853374	Organismal Systems	Nervous system
1	map00120	Primary bile acid biosynthesis	KEGG PATHWAY	1/383	18/17274	0.332215	0.854761	Metabolism	Lipid metabolism
6	map04141	Protein processing in endoplasmic reticulum	KEGG PATHWAY	6/383	208/17274	0.315074	0.855202	Genetic Information Processing	Folding, sorting and degradation
2	map00565	Ether lipid metabolism	KEGG PATHWAY	2/383	53/17274	0.329151	0.855793	Metabolism	Lipid metabolism
2	map00380	Tryptophan metabolism	KEGG PATHWAY	2/383	54/17274	0.337285	0.858859	Metabolism	Amino acid metabolism
2	map04975	Fat digestion and absorption	KEGG PATHWAY	2/383	54/17274	0.337285	0.858859	Organismal Systems	Digestive system
9	map04014	Ras signaling pathway	KEGG PATHWAY	9/383	333/17274	0.320257	0.859821	Environmental Information Processing	Signal transduction
3	map04912	GnRH signaling pathway	KEGG PATHWAY	3/383	97/17274	0.364581	0.86588	Organismal Systems	Endocrine system
1	map00603	Glycosphingolipid biosynthesis - globo and isoglobo series	KEGG PATHWAY	1/383	20/17274	0.36153	0.86697	Metabolism	Glycan biosynthesis and metabolism
3	map01524	Platinum drug resistance	KEGG PATHWAY	3/383	96/17274	0.358523	0.868189	Human Diseases	Drug resistance: antineoplastic
4	map04933	AGE-RAGE signaling pathway in diabetic complications	KEGG PATHWAY	4/383	136/17274	0.35624	0.871202	Human Diseases	Endocrine and metabolic disease
2	map01523	Antifolate resistance	KEGG PATHWAY	2/383	56/17274	0.35346	0.881864	Human Diseases	Drug resistance: antineoplastic
2	map03460	Fanconi anemia pathway	KEGG PATHWAY	2/383	56/17274	0.35346	0.881864	Genetic Information Processing	Replication and repair
4	map04066	HIF-1 signaling pathway	KEGG PATHWAY	4/383	144/17274	0.396507	0.906826	Environmental Information Processing	Signal transduction
4	map04670	Leukocyte transendothelial migration	KEGG PATHWAY	4/383	150/17274	0.426452	0.908048	Organismal Systems	Immune system
12	map04151	PI3K-Akt signaling pathway	KEGG PATHWAY	12/383	492/17274	0.409494	0.911216	Environmental Information Processing	Signal transduction
2	map04961	Endocrine and other factor-regulated calcium reabsorption	KEGG PATHWAY	2/383	65/17274	0.424257	0.91123	Organismal Systems	Excretory system
6	map04510	Focal adhesion	KEGG PATHWAY	6/383	235/17274	0.421543	0.913344	Cellular Processes	Cellular community - eukaryotes
1	map00100	Steroid biosynthesis	KEGG PATHWAY	1/383	23/17274	0.403113	0.913477	Metabolism	Lipid metabolism
5	map05225	Hepatocellular carcinoma	KEGG PATHWAY	5/383	186/17274	0.395745	0.913543	Human Diseases	Cancer: specific types
5	map05161	Hepatitis B	KEGG PATHWAY	5/383	198/17274	0.448158	0.914835	Human Diseases	Infectious disease: viral
3	map04916	Melanogenesis	KEGG PATHWAY	3/383	106/17274	0.418536	0.914854	Organismal Systems	Endocrine system
1	map00220	Arginine biosynthesis	KEGG PATHWAY	1/383	22/17274	0.389561	0.916397	Metabolism	Amino acid metabolism
1	map00532	Glycosaminoglycan biosynthesis - chondroitin sulfate / dermatan sulfate	KEGG PATHWAY	1/383	22/17274	0.389561	0.916397	Metabolism	Glycan biosynthesis and metabolism
1	map04745	Phototransduction - fly	KEGG PATHWAY	1/383	32/17274	0.512342	0.917018	Organismal Systems	Sensory system
2	map05230	Central carbon metabolism in cancer	KEGG PATHWAY	2/383	82/17274	0.545802	0.917097	Human Diseases	Cancer: overview
2	map05014	Amyotrophic lateral sclerosis (ALS)	KEGG PATHWAY	2/383	76/17274	0.504968	0.917111	Human Diseases	Neurodegenerative disease
1	map00601	Glycosphingolipid biosynthesis - lacto and neolacto series	KEGG PATHWAY	1/383	31/17274	0.501264	0.917128	Metabolism	Glycan biosynthesis and metabolism
4	map04934	Cushing syndrome	KEGG PATHWAY	4/383	167/17274	0.508759	0.917251	Human Diseases	Endocrine and metabolic disease
2	map04370	VEGF signaling pathway	KEGG PATHWAY	2/383	63/17274	0.408849	0.918052	Environmental Information Processing	Signal transduction
4	map04726	Serotonergic synapse	KEGG PATHWAY	4/383	148/17274	0.416506	0.918545	Organismal Systems	Nervous system
2	map04213	Longevity regulating pathway - multiple species	KEGG PATHWAY	2/383	70/17274	0.461832	0.919939	Organismal Systems	Aging
2	map04929	GnRH secretion	KEGG PATHWAY	2/383	69/17274	0.45443	0.920034	Organismal Systems	Endocrine system
1	map05020	Prion diseases	KEGG PATHWAY	1/383	35/17274	0.544125	0.92054	Human Diseases	Neurodegenerative disease
3	map04070	Phosphatidylinositol signaling system	KEGG PATHWAY	3/383	111/17274	0.447873	0.921873	Environmental Information Processing	Signal transduction
2	map00980	Metabolism of xenobiotics by cytochrome P450	KEGG PATHWAY	2/383	78/17274	0.518842	0.921971	Metabolism	Xenobiotics biodegradation and metabolism
3	map00564	Glycerophospholipid metabolism	KEGG PATHWAY	3/383	113/17274	0.459443	0.922622	Metabolism	Lipid metabolism
4	map04659	Th17 cell differentiation	KEGG PATHWAY	4/383	160/17274	0.475431	0.924658	Organismal Systems	Immune system
2	map04730	Long-term depression	KEGG PATHWAY	2/383	75/17274	0.497934	0.924735	Organismal Systems	Nervous system
2	map04913	Ovarian steroidogenesis	KEGG PATHWAY	2/383	75/17274	0.497934	0.924735	Organismal Systems	Endocrine system
5	map05322	Systemic lupus erythematosus	KEGG PATHWAY	5/383	216/17274	0.524272	0.924965	Human Diseases	Immune disease
2	map04216	Ferroptosis	KEGG PATHWAY	2/383	90/17274	0.596496	0.926631	Cellular Processes	Cell growth and death
5	map05226	Gastric cancer	KEGG PATHWAY	5/383	219/17274	0.53653	0.926734	Human Diseases	Cancer: specific types
3	map05320	Autoimmune thyroid disease	KEGG PATHWAY	3/383	138/17274	0.593594	0.927961	Human Diseases	Immune disease
4	map05142	Chagas disease (American trypanosomiasis)	KEGG PATHWAY	4/383	174/17274	0.541105	0.928145	Human Diseases	Infectious disease: parasitic
4	map04310	Wnt signaling pathway	KEGG PATHWAY	4/383	174/17274	0.541105	0.928145	Environmental Information Processing	Signal transduction
5	map04022	cGMP-PKG signaling pathway	KEGG PATHWAY	5/383	204/17274	0.473953	0.929099	Environmental Information Processing	Signal transduction
6	map05202	Transcriptional misregulation in cancer	KEGG PATHWAY	6/383	280/17274	0.590768	0.929424	Human Diseases	Cancer: overview
4	map05418	Fluid shear stress and atherosclerosis	KEGG PATHWAY	4/383	159/17274	0.470599	0.929905	Human Diseases	Cardiovascular disease
3	map04260	Cardiac muscle contraction	KEGG PATHWAY	3/383	136/17274	0.583675	0.930114	Organismal Systems	Circulatory system
3	map04940	Type I diabetes mellitus	KEGG PATHWAY	3/383	119/17274	0.493503	0.930497	Human Diseases	Endocrine and metabolic disease
3	map04931	Insulin resistance	KEGG PATHWAY	3/383	119/17274	0.493503	0.930497	Human Diseases	Endocrine and metabolic disease
3	map04152	AMPK signaling pathway	KEGG PATHWAY	3/383	137/17274	0.588654	0.932035	Environmental Information Processing	Signal transduction
1	map00340	Histidine metabolism	KEGG PATHWAY	1/383	26/17274	0.441995	0.9331	Metabolism	Amino acid metabolism
3	map04071	Sphingolipid signaling pathway	KEGG PATHWAY	3/383	132/17274	0.563382	0.933928	Environmental Information Processing	Signal transduction
4	map04660	T cell receptor signaling pathway	KEGG PATHWAY	4/383	154/17274	0.446208	0.934012	Organismal Systems	Immune system
4	map04612	Antigen processing and presentation	KEGG PATHWAY	4/383	154/17274	0.446208	0.934012	Organismal Systems	Immune system
6	map05203	Viral carcinogenesis	KEGG PATHWAY	6/383	253/17274	0.491656	0.934147	Human Diseases	Cancer: overview
1	map00052	Galactose metabolism	KEGG PATHWAY	1/383	34/17274	0.533767	0.935039	Metabolism	Carbohydrate metabolism
1	map04966	Collecting duct acid secretion	KEGG PATHWAY	1/383	34/17274	0.533767	0.935039	Organismal Systems	Excretory system
1	map04130	SNARE interactions in vesicular transport	KEGG PATHWAY	1/383	39/17274	0.583311	0.93557	Genetic Information Processing	Folding, sorting and degradation
4	map05206	MicroRNAs in cancer	KEGG PATHWAY	4/383	183/17274	0.581037	0.938015	Human Diseases	Cancer: overview
1	map00051	Fructose and mannose metabolism	KEGG PATHWAY	1/383	38/17274	0.573841	0.938667	Metabolism	Carbohydrate metabolism
2	map00140	Steroid hormone biosynthesis	KEGG PATHWAY	2/383	92/17274	0.608488	0.939354	Metabolism	Lipid metabolism
8	map04080	Neuroactive ligand-receptor interaction	KEGG PATHWAY	8/383	365/17274	0.563205	0.939943	Environmental Information Processing	Signaling molecules and interaction
5	map04630	Jak-STAT signaling pathway	KEGG PATHWAY	5/383	208/17274	0.490935	0.940007	Environmental Information Processing	Signal transduction
3	map04724	Glutamatergic synapse	KEGG PATHWAY	3/383	135/17274	0.578658	0.940319	Organismal Systems	Nervous system
2	map04971	Gastric acid secretion	KEGG PATHWAY	2/383	86/17274	0.571692	0.941386	Organismal Systems	Digestive system
1	map04624	Toll and Imd signaling pathway	KEGG PATHWAY	1/383	50/17274	0.674596	0.946734	Organismal Systems	Immune system
2	map04720	Long-term potentiation	KEGG PATHWAY	2/383	74/17274	0.490837	0.947163	Organismal Systems	Nervous system
3	map04550	Signaling pathways regulating pluripotency of stem cells	KEGG PATHWAY	3/383	155/17274	0.671562	0.947862	Cellular Processes	Cellular community - eukaryotes
5	map05163	Human cytomegalovirus infection	KEGG PATHWAY	5/383	285/17274	0.76079	0.949066	Human Diseases	Infectious disease: viral
2	map04540	Gap junction	KEGG PATHWAY	2/383	103/17274	0.669607	0.950535	Cellular Processes	Cellular community - eukaryotes
1	map00760	Nicotinate and nicotinamide metabolism	KEGG PATHWAY	1/383	51/17274	0.681832	0.951483	Metabolism	Metabolism of cofactors and vitamins
2	map04911	Insulin secretion	KEGG PATHWAY	2/383	94/17274	0.620208	0.9515	Organismal Systems	Endocrine system
6	map05170	Human immunodeficiency virus 1 infection	KEGG PATHWAY	6/383	332/17274	0.748663	0.953195	Human Diseases	Infectious disease: viral
3	map04371	Apelin signaling pathway	KEGG PATHWAY	3/383	174/17274	0.74507	0.953535	Environmental Information Processing	Signal transduction
2	map00983	Drug metabolism - other enzymes	KEGG PATHWAY	2/383	95/17274	0.625966	0.954406	Metabolism	Xenobiotics biodegradation and metabolism
2	map04922	Glucagon signaling pathway	KEGG PATHWAY	2/383	117/17274	0.735978	0.956772	Organismal Systems	Endocrine system
2	map04928	Parathyroid hormone synthesis, secretion and action	KEGG PATHWAY	2/383	118/17274	0.740256	0.957294	Organismal Systems	Endocrine system
2	map05032	Morphine addiction	KEGG PATHWAY	2/383	119/17274	0.744474	0.957734	Human Diseases	Substance dependence
2	map04713	Circadian entrainment	KEGG PATHWAY	2/383	123/17274	0.760764	0.958717	Organismal Systems	Environmental adaptation
2	map04935	Growth hormone synthesis, secretion and action	KEGG PATHWAY	2/383	123/17274	0.760764	0.958717	Organismal Systems	Endocrine system
1	map04923	Regulation of lipolysis in adipocytes	KEGG PATHWAY	1/383	63/17274	0.757105	0.959	Organismal Systems	Endocrine system
1	map05030	Cocaine addiction	KEGG PATHWAY	1/383	55/17274	0.709205	0.962493	Human Diseases	Substance dependence
4	map04932	Non-alcoholic fatty liver disease (NAFLD)	KEGG PATHWAY	4/383	222/17274	0.728791	0.962627	Human Diseases	Endocrine and metabolic disease
5	map04144	Endocytosis	KEGG PATHWAY	5/383	294/17274	0.783916	0.96332	Cellular Processes	Transport and catabolism
9	map05010	Alzheimer disease	KEGG PATHWAY	9/383	463/17274	0.702269	0.963669	Human Diseases	Neurodegenerative disease
1	map00860	Porphyrin and chlorophyll metabolism	KEGG PATHWAY	1/383	49/17274	0.667196	0.963728	Metabolism	Metabolism of cofactors and vitamins
1	map04215	Apoptosis - multiple species	KEGG PATHWAY	1/383	49/17274	0.667196	0.963728	Cellular Processes	Cell growth and death
1	map03440	Homologous recombination	KEGG PATHWAY	1/383	49/17274	0.667196	0.963728	Genetic Information Processing	Replication and repair
2	map05332	Graft-versus-host disease	KEGG PATHWAY	2/383	108/17274	0.694736	0.964044	Human Diseases	Immune disease
1	map04330	Notch signaling pathway	KEGG PATHWAY	1/383	59/17274	0.73423	0.964653	Environmental Information Processing	Signal transduction
1	map00330	Arginine and proline metabolism	KEGG PATHWAY	1/383	59/17274	0.73423	0.964653	Metabolism	Amino acid metabolism
5	map04024	cAMP signaling pathway	KEGG PATHWAY	5/383	264/17274	0.699759	0.965589	Environmental Information Processing	Signal transduction
1	map05110	Vibrio cholerae infection	KEGG PATHWAY	1/383	67/17274	0.778017	0.965679	Human Diseases	Infectious disease: bacterial
1	map05217	Basal cell carcinoma	KEGG PATHWAY	1/383	67/17274	0.778017	0.965679	Human Diseases	Cancer: specific types
2	map05204	Chemical carcinogenesis	KEGG PATHWAY	2/383	97/17274	0.637279	0.965693	Human Diseases	Cancer: overview
2	map05222	Small cell lung cancer	KEGG PATHWAY	2/383	115/17274	0.727244	0.965749	Human Diseases	Cancer: specific types
2	map04068	FoxO signaling pathway	KEGG PATHWAY	2/383	139/17274	0.817221	0.965807	Environmental Information Processing	Signal transduction
2	map05235	PD-L1 expression and PD-1 checkpoint pathway in cancer	KEGG PATHWAY	2/383	139/17274	0.817221	0.965807	Human Diseases	Cancer: overview
3	map04530	Tight junction	KEGG PATHWAY	3/383	201/17274	0.826282	0.967259	Cellular Processes	Cellular community - eukaryotes
2	map04350	TGF-beta signaling pathway	KEGG PATHWAY	2/383	111/17274	0.709043	0.967589	Environmental Information Processing	Signal transduction
1	map00510	N-Glycan biosynthesis	KEGG PATHWAY	1/383	57/17274	0.721998	0.969204	Metabolism	Glycan biosynthesis and metabolism
1	map00520	Amino sugar and nucleotide sugar metabolism	KEGG PATHWAY	1/383	57/17274	0.721998	0.969204	Metabolism	Carbohydrate metabolism
3	map04218	Cellular senescence	KEGG PATHWAY	3/383	195/17274	0.810418	0.971715	Cellular Processes	Cell growth and death
1	map04137	Mitophagy - animal	KEGG PATHWAY	1/383	75/17274	0.814605	0.972017	Cellular Processes	Transport and catabolism
1	map05211	Renal cell carcinoma	KEGG PATHWAY	1/383	75/17274	0.814605	0.972017	Human Diseases	Cancer: specific types
4	map04974	Protein digestion and absorption	KEGG PATHWAY	4/383	204/17274	0.665953	0.973316	Organismal Systems	Digestive system
4	map04360	Axon guidance	KEGG PATHWAY	4/383	204/17274	0.665953	0.973316	Organismal Systems	Development and regeneration
5	map04810	Regulation of actin cytoskeleton	KEGG PATHWAY	5/383	271/17274	0.721213	0.973441	Cellular Processes	Cell motility
3	map04150	mTOR signaling pathway	KEGG PATHWAY	3/383	190/17274	0.796281	0.97367	Environmental Information Processing	Signal transduction
12	map05200	Pathways in cancer	KEGG PATHWAY	12/383	664/17274	0.804296	0.973828	Human Diseases	Cancer: overview
5	map04015	Rap1 signaling pathway	KEGG PATHWAY	5/383	301/17274	0.800681	0.974228	Environmental Information Processing	Signal transduction
1	map05031	Amphetamine addiction	KEGG PATHWAY	1/383	81/17274	0.838041	0.976397	Human Diseases	Substance dependence
1	map00982	Drug metabolism - cytochrome P450	KEGG PATHWAY	1/383	74/17274	0.810383	0.976413	Metabolism	Xenobiotics biodegradation and metabolism
1	map00010	Glycolysis / Gluconeogenesis	KEGG PATHWAY	1/383	87/17274	0.858521	0.97721	Metabolism	Carbohydrate metabolism
3	map04915	Estrogen signaling pathway	KEGG PATHWAY	3/383	150/17274	0.649826	0.978702	Organismal Systems	Endocrine system
2	map05416	Viral myocarditis	KEGG PATHWAY	2/383	153/17274	0.856527	0.979454	Human Diseases	Cardiovascular disease
1	map04721	Synaptic vesicle cycle	KEGG PATHWAY	1/383	84/17274	0.848626	0.979489	Organismal Systems	Nervous system
1	map04917	Prolactin signaling pathway	KEGG PATHWAY	1/383	84/17274	0.848626	0.979489	Organismal Systems	Endocrine system
1	map00830	Retinol metabolism	KEGG PATHWAY	1/383	83/17274	0.845177	0.980087	Metabolism	Metabolism of cofactors and vitamins
1	map00513	Various types of N-glycan biosynthesis	KEGG PATHWAY	1/383	48/17274	0.659628	0.987444	Metabolism	Glycan biosynthesis and metabolism
2	map04976	Bile secretion	KEGG PATHWAY	2/383	102/17274	0.664386	0.988574	Organismal Systems	Digestive system
2	map05218	Melanoma	KEGG PATHWAY	2/383	102/17274	0.664386	0.988574	Human Diseases	Cancer: specific types
2	map04212	Longevity regulating pathway - worm	KEGG PATHWAY	2/383	102/17274	0.664386	0.988574	Organismal Systems	Aging
1	map04727	GABAergic synapse	KEGG PATHWAY	1/383	106/17274	0.907821	0.996585	Organismal Systems	Nervous system
3	map05012	Parkinson disease	KEGG PATHWAY	3/383	246/17274	0.912751	0.997564	Human Diseases	Neurodegenerative disease
2	map05224	Breast cancer	KEGG PATHWAY	2/383	184/17274	0.917564	0.998407	Human Diseases	Cancer: specific types
1	map05231	Choline metabolism in cancer	KEGG PATHWAY	1/383	105/17274	0.905717	0.998715	Human Diseases	Cancer: overview
2	map04910	Insulin signaling pathway	KEGG PATHWAY	2/383	166/17274	0.885961	0.999235	Organismal Systems	Endocrine system
1	map05017	Spinocerebellar ataxia	KEGG PATHWAY	1/383	114/17274	0.923046	0.999967	Human Diseases	Neurodegenerative disease
3	map04740	Olfactory transduction	KEGG PATHWAY	3/383	796/17274	0.999998	0.999998	Organismal Systems	Sensory system
2	map04728	Dopaminergic synapse	KEGG PATHWAY	2/383	165/17274	0.883912	1	Organismal Systems	Nervous system
2	map04926	Relaxin signaling pathway	KEGG PATHWAY	2/383	170/17274	0.893829	1	Organismal Systems	Endocrine system
1	map04013	MAPK signaling pathway - fly	KEGG PATHWAY	1/383	101/17274	0.896815	1	Environmental Information Processing	Signal transduction
1	map04115	p53 signaling pathway	KEGG PATHWAY	1/383	101/17274	0.896815	1	Cellular Processes	Cell growth and death
1	map01521	EGFR tyrosine kinase inhibitor resistance	KEGG PATHWAY	1/383	101/17274	0.896815	1	Human Diseases	Drug resistance: antineoplastic
3	map04742	Taste transduction	KEGG PATHWAY	3/383	258/17274	0.928014	1	Organismal Systems	Sensory system
2	map04723	Retrograde endocannabinoid signaling	KEGG PATHWAY	2/383	196/17274	0.933851	1	Organismal Systems	Nervous system
5	map05016	Huntington disease	KEGG PATHWAY	5/383	402/17274	0.945952	1	Human Diseases	Neurodegenerative disease
1	map04919	Thyroid hormone signaling pathway	KEGG PATHWAY	1/383	134/17274	0.951015	1	Organismal Systems	Endocrine system
2	map04390	Hippo signaling pathway	KEGG PATHWAY	2/383	214/17274	0.952688	1	Environmental Information Processing	Signal transduction
2	map04142	Lysosome	KEGG PATHWAY	2/383	217/17274	0.955282	1	Cellular Processes	Transport and catabolism
1	map04658	Th1 and Th2 cell differentiation	KEGG PATHWAY	1/383	145/17274	0.961799	1	Organismal Systems	Immune system
1	map04114	Oocyte meiosis	KEGG PATHWAY	1/383	152/17274	0.967393	1	Cellular Processes	Cell growth and death
2	map00190	Oxidative phosphorylation	KEGG PATHWAY	2/383	234/17274	0.967599	1	Metabolism	Energy metabolism
1	map04110	Cell cycle	KEGG PATHWAY	1/383	153/17274	0.968122	1	Cellular Processes	Cell growth and death
1	map04140	Autophagy - animal	KEGG PATHWAY	1/383	165/17274	0.975704	1	Cellular Processes	Transport and catabolism
2	map04120	Ubiquitin mediated proteolysis	KEGG PATHWAY	2/383	269/17274	0.983517	1	Genetic Information Processing	Folding, sorting and degradation
1	map03420	Nucleotide excision repair	KEGG PATHWAY	1/383	203/17274	0.989732	1	Genetic Information Processing	Replication and repair
1	map03013	RNA transport	KEGG PATHWAY	1/383	229/17274	0.99431	1	Genetic Information Processing	Translation
2	map04714	Thermogenesis	KEGG PATHWAY	2/383	349/17274	0.996654	1	Organismal Systems	Environmental adaptation
1	map05166	Human T-cell leukemia virus 1 infection	KEGG PATHWAY	1/383	319/17274	0.999268	1	Human Diseases	Infectious disease: viral
2	map03010	Ribosome	KEGG PATHWAY	2/383	508/17274	0.999877	1	Genetic Information Processing	Translation
1	map03040	Spliceosome	KEGG PATHWAY	1/383	515/17274	0.999992	1	Genetic Information Processing	Transcription
