# Supplementary material for: Differentially Expressed Genes and Signalling Pathways Regulated by High Selenium Involved in Antioxidant and Immune Functions of Goats Based on Transcriptome Sequencing
Source: Int J Mol Sci. 2023 Jan 6;24(2):1124. doi: 10.3390/ijms24021124 (PMC9864924; doi:10.3390/ijms24021124)
Supplement: Supplementary file 1 [file ijms-24-01124-s001.zip › Table S5. The upregulated differentially expression genes were enriched in KEGG pathways.xlsx]

## Sheet: Sheet1
Table S4. The upregulated differentially expression genes were enriched in KEGG pathways
Num	Pathway id	Description	Database	Ratio_in_study	Ratio_in_pop	Pvalue	Padjust	First Category	Second Category
2	map01040	Biosynthesis of unsaturated fatty acids	KEGG PATHWAY	2/92	35/17274	0.0148946	0.59082	Metabolism	Lipid metabolism
2	map00592	alpha-Linolenic acid metabolism	KEGG PATHWAY	2/92	31/17274	0.0118015	0.702189	Metabolism	Lipid metabolism
4	map05016	Huntington disease	KEGG PATHWAY	4/92	402/17274	0.166757	0.763232	Human Diseases	Neurodegenerative disease
1	map04932	Non-alcoholic fatty liver disease	KEGG PATHWAY	1/92	222/17274	0.696746	0.767711	Human Diseases	Endocrine and metabolic disease
1	map05162	Measles	KEGG PATHWAY	1/92	215/17274	0.685045	0.76906	Human Diseases	Infectious disease: viral
1	map04360	Axon guidance	KEGG PATHWAY	1/92	204/17274	0.665748	0.769166	Organismal Systems	Development and regeneration
1	map04022	cGMP-PKG signaling pathway	KEGG PATHWAY	1/92	204/17274	0.665748	0.769166	Environmental Information Processing	Signal transduction
1	map05226	Gastric cancer	KEGG PATHWAY	1/92	219/17274	0.691785	0.769368	Human Diseases	Cancer: specific types
1	map04390	Hippo signaling pathway	KEGG PATHWAY	1/92	214/17274	0.683337	0.774449	Environmental Information Processing	Signal transduction
1	map03420	Nucleotide excision repair	KEGG PATHWAY	1/92	203/17274	0.663937	0.774593	Genetic Information Processing	Replication and repair
1	map04750	Inflammatory mediator regulation of TRP channels	KEGG PATHWAY	1/92	119/17274	0.471475	0.779243	Organismal Systems	Sensory system
1	map04640	Hematopoietic cell lineage	KEGG PATHWAY	1/92	119/17274	0.471475	0.779243	Organismal Systems	Immune system
1	map04512	ECM-receptor interaction	KEGG PATHWAY	1/92	119/17274	0.471475	0.779243	Environmental Information Processing	Signaling molecules and interaction
1	map04666	Fc gamma R-mediated phagocytosis	KEGG PATHWAY	1/92	119/17274	0.471475	0.779243	Organismal Systems	Immune system
1	map04931	Insulin resistance	KEGG PATHWAY	1/92	119/17274	0.471475	0.779243	Human Diseases	Endocrine and metabolic disease
1	map04910	Insulin signaling pathway	KEGG PATHWAY	1/92	166/17274	0.589647	0.779645	Organismal Systems	Endocrine system
2	map04144	Endocytosis	KEGG PATHWAY	2/92	294/17274	0.46603	0.781093	Cellular Processes	Transport and catabolism
1	map04550	Signaling pathways regulating pluripotency of stem cells	KEGG PATHWAY	1/92	155/17274	0.564581	0.781222	Cellular Processes	Cellular community - eukaryotes
1	map00190	Oxidative phosphorylation	KEGG PATHWAY	1/92	234/17274	0.715813	0.781484	Metabolism	Energy metabolism
1	map04068	FoxO signaling pathway	KEGG PATHWAY	1/92	139/17274	0.525394	0.781524	Environmental Information Processing	Signal transduction
2	map04014	Ras signaling pathway	KEGG PATHWAY	2/92	333/17274	0.532121	0.781758	Environmental Information Processing	Signal transduction
1	map04152	AMPK signaling pathway	KEGG PATHWAY	1/92	137/17274	0.520257	0.783678	Environmental Information Processing	Signal transduction
1	map05418	Fluid shear stress and atherosclerosis	KEGG PATHWAY	1/92	159/17274	0.573866	0.784944	Human Diseases	Cardiovascular disease
1	map04140	Autophagy - animal	KEGG PATHWAY	1/92	165/17274	0.587429	0.785439	Cellular Processes	Transport and catabolism
1	map04145	Phagosome	KEGG PATHWAY	1/92	201/17274	0.660286	0.78574	Cellular Processes	Transport and catabolism
1	map04530	Tight junction	KEGG PATHWAY	1/92	201/17274	0.660286	0.78574	Cellular Processes	Cellular community - eukaryotes
1	map04612	Antigen processing and presentation	KEGG PATHWAY	1/92	154/17274	0.562228	0.78712	Organismal Systems	Immune system
2	map04714	Thermogenesis	KEGG PATHWAY	2/92	349/17274	0.557609	0.789946	Organismal Systems	Environmental adaptation
1	map04611	Platelet activation	KEGG PATHWAY	1/92	164/17274	0.585198	0.791348	Organismal Systems	Immune system
1	map04621	NOD-like receptor signaling pathway	KEGG PATHWAY	1/92	200/17274	0.658445	0.791465	Organismal Systems	Immune system
1	map04922	Glucagon signaling pathway	KEGG PATHWAY	1/92	117/17274	0.465761	0.791793	Organismal Systems	Endocrine system
3	map04024	cAMP signaling pathway	KEGG PATHWAY	3/92	264/17274	0.16645	0.7923	Environmental Information Processing	Signal transduction
1	map04915	Estrogen signaling pathway	KEGG PATHWAY	1/92	150/17274	0.552692	0.792414	Organismal Systems	Endocrine system
1	map04371	Apelin signaling pathway	KEGG PATHWAY	1/92	174/17274	0.606976	0.793738	Environmental Information Processing	Signal transduction
1	map04310	Wnt signaling pathway	KEGG PATHWAY	1/92	174/17274	0.606976	0.793738	Environmental Information Processing	Signal transduction
1	map04726	Serotonergic synapse	KEGG PATHWAY	1/92	148/17274	0.547847	0.795046	Organismal Systems	Nervous system
1	map05145	Toxoplasmosis	KEGG PATHWAY	1/92	135/17274	0.515065	0.796009	Human Diseases	Infectious disease: parasitic
1	map04724	Glutamatergic synapse	KEGG PATHWAY	1/92	135/17274	0.515065	0.796009	Organismal Systems	Nervous system
2	map05165	Human papillomavirus infection	KEGG PATHWAY	2/92	418/17274	0.656166	0.796772	Human Diseases	Infectious disease: viral
2	map05132	Salmonella infection	KEGG PATHWAY	2/92	293/17274	0.464265	0.800689	Human Diseases	Infectious disease: bacterial
1	map04650	Natural killer cell mediated cytotoxicity	KEGG PATHWAY	1/92	197/17274	0.652865	0.800937	Organismal Systems	Immune system
1	map04150	mTOR signaling pathway	KEGG PATHWAY	1/92	190/17274	0.63949	0.801046	Environmental Information Processing	Signal transduction
1	map05224	Breast cancer	KEGG PATHWAY	1/92	184/17274	0.627622	0.803086	Human Diseases	Cancer: specific types
1	map04218	Cellular senescence	KEGG PATHWAY	1/92	195/17274	0.649094	0.804607	Cellular Processes	Cell growth and death
2	map00564	Glycerophospholipid metabolism	KEGG PATHWAY	2/92	113/17274	0.121713	0.804656	Metabolism	Lipid metabolism
1	map04210	Apoptosis	KEGG PATHWAY	1/92	189/17274	0.637539	0.807097	Cellular Processes	Cell growth and death
1	map04970	Salivary secretion	KEGG PATHWAY	1/92	112/17274	0.451206	0.813539	Organismal Systems	Digestive system
1	map04625	C-type lectin receptor signaling pathway	KEGG PATHWAY	1/92	106/17274	0.433223	0.818309	Organismal Systems	Immune system
1	map04916	Melanogenesis	KEGG PATHWAY	1/92	106/17274	0.433223	0.818309	Organismal Systems	Endocrine system
2	map03010	Ribosome	KEGG PATHWAY	2/92	508/17274	0.757752	0.81975	Genetic Information Processing	Translation
1	map05412	Arrhythmogenic right ventricular cardiomyopathy	KEGG PATHWAY	1/92	116/17274	0.462881	0.822131	Human Diseases	Cardiovascular disease
1	map04972	Pancreatic secretion	KEGG PATHWAY	1/92	116/17274	0.462881	0.822131	Organismal Systems	Digestive system
3	map05010	Alzheimer disease	KEGG PATHWAY	3/92	463/17274	0.449349	0.822654	Human Diseases	Neurodegenerative disease
1	map00500	Starch and sucrose metabolism	KEGG PATHWAY	1/92	34/17274	0.166181	0.823983	Metabolism	Carbohydrate metabolism
1	map05231	Choline metabolism in cancer	KEGG PATHWAY	1/92	105/17274	0.430169	0.825647	Human Diseases	Cancer: overview
1	map00601	Glycosphingolipid biosynthesis - lacto and neolacto series	KEGG PATHWAY	1/92	31/17274	0.15269	0.825916	Metabolism	Glycan biosynthesis and metabolism
2	map05146	Amoebiasis	KEGG PATHWAY	2/92	170/17274	0.229218	0.826574	Human Diseases	Infectious disease: parasitic
2	map04810	Regulation of actin cytoskeleton	KEGG PATHWAY	2/92	271/17274	0.424616	0.82835	Cellular Processes	Cell motility
1	map04020	Calcium signaling pathway	KEGG PATHWAY	1/92	278/17274	0.776116	0.832052	Environmental Information Processing	Signal transduction
2	map04510	Focal adhesion	KEGG PATHWAY	2/92	235/17274	0.356777	0.832481	Cellular Processes	Cellular community - eukaryotes
1	map05130	Pathogenic Escherichia coli infection	KEGG PATHWAY	1/92	285/17274	0.784464	0.833493	Human Diseases	Infectious disease: bacterial
2	map04921	Oxytocin signaling pathway	KEGG PATHWAY	2/92	168/17274	0.225293	0.83781	Organismal Systems	Endocrine system
1	map00534	Glycosaminoglycan biosynthesis - heparan sulfate / heparin	KEGG PATHWAY	1/92	30/17274	0.148146	0.839492	Metabolism	Glycan biosynthesis and metabolism
2	map04925	Aldosterone synthesis and secretion	KEGG PATHWAY	2/92	112/17274	0.119956	0.839693	Organismal Systems	Endocrine system
1	map04540	Gap junction	KEGG PATHWAY	1/92	103/17274	0.424013	0.84096	Cellular Processes	Cellular community - eukaryotes
1	map04977	Vitamin digestion and absorption	KEGG PATHWAY	1/92	27/17274	0.134366	0.841556	Organismal Systems	Digestive system
1	map04015	Rap1 signaling pathway	KEGG PATHWAY	1/92	301/17274	0.802407	0.845013	Environmental Information Processing	Signal transduction
1	map00562	Inositol phosphate metabolism	KEGG PATHWAY	1/92	82/17274	0.355271	0.845545	Metabolism	Carbohydrate metabolism
1	map04912	GnRH signaling pathway	KEGG PATHWAY	1/92	97/17274	0.405149	0.845837	Organismal Systems	Endocrine system
1	map05204	Chemical carcinogenesis	KEGG PATHWAY	1/92	97/17274	0.405149	0.845837	Human Diseases	Cancer: overview
2	map04260	Cardiac muscle contraction	KEGG PATHWAY	2/92	136/17274	0.16365	0.84671	Organismal Systems	Circulatory system
1	map04978	Mineral absorption	KEGG PATHWAY	1/92	102/17274	0.420911	0.848956	Organismal Systems	Digestive system
1	map01524	Platinum drug resistance	KEGG PATHWAY	1/92	96/17274	0.401946	0.854135	Human Diseases	Drug resistance: antineoplastic
1	map00983	Drug metabolism - other enzymes	KEGG PATHWAY	1/92	95/17274	0.398726	0.862697	Metabolism	Xenobiotics biodegradation and metabolism
1	map04664	Fc epsilon RI signaling pathway	KEGG PATHWAY	1/92	80/17274	0.348316	0.863533	Organismal Systems	Immune system
1	map04918	Thyroid hormone synthesis	KEGG PATHWAY	1/92	80/17274	0.348316	0.863533	Organismal Systems	Endocrine system
1	map00565	Ether lipid metabolism	KEGG PATHWAY	1/92	53/17274	0.246824	0.863884	Metabolism	Lipid metabolism
1	map00980	Metabolism of xenobiotics by cytochrome P450	KEGG PATHWAY	1/92	78/17274	0.341286	0.864107	Metabolism	Xenobiotics biodegradation and metabolism
1	map05014	Amyotrophic lateral sclerosis	KEGG PATHWAY	1/92	76/17274	0.334181	0.864513	Human Diseases	Neurodegenerative disease
2	map05012	Parkinson disease	KEGG PATHWAY	2/92	246/17274	0.377844	0.864681	Human Diseases	Neurodegenerative disease
1	map05131	Shigellosis	KEGG PATHWAY	1/92	327/17274	0.828464	0.864801	Human Diseases	Infectious disease: bacterial
1	map05030	Cocaine addiction	KEGG PATHWAY	1/92	55/17274	0.25485	0.86649	Human Diseases	Substance dependence
1	map04657	IL-17 signaling pathway	KEGG PATHWAY	1/92	94/17274	0.395488	0.871539	Organismal Systems	Immune system
1	map05134	Legionellosis	KEGG PATHWAY	1/92	92/17274	0.388962	0.87333	Human Diseases	Infectious disease: bacterial
2	map05414	Dilated cardiomyopathy	KEGG PATHWAY	2/92	127/17274	0.146922	0.874186	Human Diseases	Cardiovascular disease
2	map05410	Hypertrophic cardiomyopathy	KEGG PATHWAY	2/92	111/17274	0.118206	0.879159	Human Diseases	Cardiovascular disease
1	map04060	Cytokine-cytokine receptor interaction	KEGG PATHWAY	1/92	352/17274	0.850304	0.87988	Environmental Information Processing	Signaling molecules and interaction
2	map04072	Phospholipase D signaling pathway	KEGG PATHWAY	2/92	167/17274	0.223333	0.885888	Environmental Information Processing	Signal transduction
2	map04934	Cushing syndrome	KEGG PATHWAY	2/92	167/17274	0.223333	0.885888	Human Diseases	Endocrine and metabolic disease
2	map05200	Pathways in cancer	KEGG PATHWAY	2/92	664/17274	0.873657	0.896251	Human Diseases	Cancer: overview
2	map00230	Purine metabolism	KEGG PATHWAY	2/92	165/17274	0.219417	0.900365	Metabolism	Nucleotide metabolism
2	map00590	Arachidonic acid metabolism	KEGG PATHWAY	2/92	109/17274	0.114726	0.910163	Metabolism	Lipid metabolism
2	map04213	Longevity regulating pathway - multiple species	KEGG PATHWAY	2/92	70/17274	0.0536538	0.912114	Organismal Systems	Aging
1	map04137	Mitophagy - animal	KEGG PATHWAY	1/92	75/17274	0.330601	0.914918	Cellular Processes	Transport and catabolism
1	map04913	Ovarian steroidogenesis	KEGG PATHWAY	1/92	75/17274	0.330601	0.914918	Organismal Systems	Endocrine system
1	map04730	Long-term depression	KEGG PATHWAY	1/92	75/17274	0.330601	0.914918	Organismal Systems	Nervous system
1	map00591	Linoleic acid metabolism	KEGG PATHWAY	1/92	44/17274	0.209635	0.923948	Metabolism	Lipid metabolism
1	map00250	Alanine, aspartate and glutamate metabolism	KEGG PATHWAY	1/92	46/17274	0.218053	0.926726	Metabolism	Amino acid metabolism
2	map04212	Longevity regulating pathway - worm	KEGG PATHWAY	2/92	102/17274	0.10277	0.940737	Organismal Systems	Aging
1	map05217	Basal cell carcinoma	KEGG PATHWAY	1/92	67/17274	0.301261	0.943422	Human Diseases	Cancer: specific types
1	map04151	PI3K-Akt signaling pathway	KEGG PATHWAY	1/92	492/17274	0.930437	0.946342	Environmental Information Processing	Signal transduction
1	map03040	Spliceosome	KEGG PATHWAY	1/92	515/17274	0.938704	0.946659	Genetic Information Processing	Transcription
1	map04720	Long-term potentiation	KEGG PATHWAY	1/92	74/17274	0.327001	0.9491	Organismal Systems	Nervous system
1	map00982	Drug metabolism - cytochrome P450	KEGG PATHWAY	1/92	74/17274	0.327001	0.9491	Metabolism	Xenobiotics biodegradation and metabolism
2	map04974	Protein digestion and absorption	KEGG PATHWAY	2/92	204/17274	0.296278	0.952895	Organismal Systems	Digestive system
1	map05168	Herpes simplex virus 1 infection	KEGG PATHWAY	1/92	564/17274	0.953214	0.953214	Human Diseases	Infectious disease: viral
4	map04010	MAPK signaling pathway	KEGG PATHWAY	4/92	345/17274	0.112336	0.954856	Environmental Information Processing	Signal transduction
1	map04927	Cortisol synthesis and secretion	KEGG PATHWAY	1/92	71/17274	0.316086	0.964468	Organismal Systems	Endocrine system
2	map04217	Necroptosis	KEGG PATHWAY	2/92	219/17274	0.32572	0.969017	Cellular Processes	Cell growth and death
1	map04961	Endocrine and other factor-regulated calcium reabsorption	KEGG PATHWAY	1/92	65/17274	0.293729	0.970938	Organismal Systems	Excretory system
2	map03320	PPAR signaling pathway	KEGG PATHWAY	2/92	89/17274	0.0816042	0.97109	Organismal Systems	Endocrine system
4	map04270	Vascular smooth muscle contraction	KEGG PATHWAY	4/92	150/17274	0.00845589	1	Organismal Systems	Circulatory system
2	map04370	VEGF signaling pathway	KEGG PATHWAY	2/92	63/17274	0.0444314	1	Environmental Information Processing	Signal transduction
4	map05205	Proteoglycans in cancer	KEGG PATHWAY	4/92	259/17274	0.0496077	1	Human Diseases	Cancer: overview
2	map00480	Glutathione metabolism	KEGG PATHWAY	2/92	69/17274	0.0522975	1	Metabolism	Metabolism of other amino acids
3	map04261	Adrenergic signaling in cardiomyocytes	KEGG PATHWAY	3/92	182/17274	0.073275	1	Organismal Systems	Circulatory system
3	map05225	Hepatocellular carcinoma	KEGG PATHWAY	3/92	186/17274	0.0770901	1	Human Diseases	Cancer: specific types
3	map04141	Protein processing in endoplasmic reticulum	KEGG PATHWAY	3/92	208/17274	0.0995675	1	Genetic Information Processing	Folding, sorting and degradation
1	map00603	Glycosphingolipid biosynthesis - globo and isoglobo series	KEGG PATHWAY	1/92	20/17274	0.10135	1	Metabolism	Glycan biosynthesis and metabolism
