# Supplementary material for: Differentially Expressed Genes and Signalling Pathways Regulated by High Selenium Involved in Antioxidant and Immune Functions of Goats Based on Transcriptome Sequencing
Source: Int J Mol Sci. 2023 Jan 6;24(2):1124. doi: 10.3390/ijms24021124 (PMC9864924; doi:10.3390/ijms24021124)
Supplement: Supplementary file 1 [file ijms-24-01124-s001.zip › Table S6. The downregulated differentially expression genes were enriched in KEGG pathways.xlsx]

## Sheet: Sheet1
Table S5. The downregulated differentially expression genes were enriched in KEGG pathways
Num	Pathway id	Description	Database	Ratio_in_study	Ratio_in_pop	Pvalue	Padjust	First Category	Second Category
22	map04621	NOD-like receptor signaling pathway	KEGG PATHWAY	22/291	200/17274	3.32923e-12	7.69051e-10	Organismal Systems	Immune system
19	map05164	Influenza A	KEGG PATHWAY	19/291	221/17274	6.8254e-09	7.88334e-07	Human Diseases	Infectious disease: viral
23	map04060	Cytokine-cytokine receptor interaction	KEGG PATHWAY	23/291	352/17274	3.27302e-08	2.52022e-06	Environmental Information Processing	Signaling molecules and interaction
12	map04640	Hematopoietic cell lineage	KEGG PATHWAY	12/291	119/17274	7.94583e-07	4.58872e-05	Organismal Systems	Immune system
8	map05143	African trypanosomiasis	KEGG PATHWAY	8/291	51/17274	2.00106e-06	9.24489e-05	Human Diseases	Infectious disease: parasitic
13	map05323	Rheumatoid arthritis	KEGG PATHWAY	13/291	165/17274	4.55429e-06	0.000131505	Human Diseases	Immune disease
15	map05152	Tuberculosis	KEGG PATHWAY	15/291	217/17274	4.29312e-06	0.000141673	Human Diseases	Infectious disease: bacterial
11	map04061	Viral protein interaction with cytokine and cytokine receptor	KEGG PATHWAY	11/291	115/17274	3.86839e-06	0.000148933	Environmental Information Processing	Signaling molecules and interaction
14	map04145	Phagosome	KEGG PATHWAY	14/291	201/17274	8.22995e-06	0.000211235	Cellular Processes	Transport and catabolism
10	map05140	Leishmaniasis	KEGG PATHWAY	10/291	105/17274	1.11091e-05	0.000256621	Human Diseases	Infectious disease: parasitic
10	map04668	TNF signaling pathway	KEGG PATHWAY	10/291	126/17274	5.4408e-05	0.00114257	Environmental Information Processing	Signal transduction
12	map05160	Hepatitis C	KEGG PATHWAY	12/291	190/17274	9.4098e-05	0.00181139	Human Diseases	Infectious disease: viral
11	map04064	NF-kappa B signaling pathway	KEGG PATHWAY	11/291	166/17274	0.000120101	0.0021341	Environmental Information Processing	Signal transduction
7	map04623	Cytosolic DNA-sensing pathway	KEGG PATHWAY	7/291	72/17274	0.000207031	0.00341602	Organismal Systems	Immune system
12	map04217	Necroptosis	KEGG PATHWAY	12/291	219/17274	0.000352718	0.00543186	Cellular Processes	Cell growth and death
10	map05150	Staphylococcus aureus infection	KEGG PATHWAY	10/291	169/17274	0.000598911	0.00864678	Human Diseases	Infectious disease: bacterial
7	map04662	B cell receptor signaling pathway	KEGG PATHWAY	7/291	87/17274	0.000662875	0.0090073	Organismal Systems	Immune system
7	map05134	Legionellosis	KEGG PATHWAY	7/291	92/17274	0.000925474	0.0118769	Human Diseases	Infectious disease: bacterial
11	map05162	Measles	KEGG PATHWAY	11/291	215/17274	0.00108365	0.0125162	Human Diseases	Infectious disease: viral
7	map04657	IL-17 signaling pathway	KEGG PATHWAY	7/291	94/17274	0.00105098	0.0127777	Organismal Systems	Immune system
7	map04622	RIG-I-like receptor signaling pathway	KEGG PATHWAY	7/291	104/17274	0.00189219	0.0208141	Organismal Systems	Immune system
7	map04610	Complement and coagulation cascades	KEGG PATHWAY	7/291	105/17274	0.00199878	0.0209871	Organismal Systems	Immune system
7	map04625	C-type lectin receptor signaling pathway	KEGG PATHWAY	7/291	106/17274	0.00210995	0.0211912	Organismal Systems	Immune system
5	map04979	Cholesterol metabolism	KEGG PATHWAY	5/291	56/17274	0.00248229	0.0229364	Organismal Systems	Digestive system
9	map05146	Amoebiasis	KEGG PATHWAY	9/291	170/17274	0.00240115	0.023111	Human Diseases	Infectious disease: parasitic
7	map04620	Toll-like receptor signaling pathway	KEGG PATHWAY	7/291	116/17274	0.00350366	0.0299758	Organismal Systems	Immune system
19	map05168	Herpes simplex virus 1 infection	KEGG PATHWAY	19/291	564/17274	0.00337907	0.0300218	Human Diseases	Infectious disease: viral
12	map05169	Epstein-Barr virus infection	KEGG PATHWAY	12/291	310/17274	0.00651661	0.0519082	Human Diseases	Infectious disease: viral
7	map04380	Osteoclast differentiation	KEGG PATHWAY	7/291	130/17274	0.0065137	0.053738	Organismal Systems	Development and regeneration
9	map04062	Chemokine signaling pathway	KEGG PATHWAY	9/291	203/17274	0.00762436	0.0568138	Organismal Systems	Immune system
6	map05144	Malaria	KEGG PATHWAY	6/291	102/17274	0.0075846	0.0584014	Human Diseases	Infectious disease: parasitic
5	map04664	Fc epsilon RI signaling pathway	KEGG PATHWAY	5/291	80/17274	0.0112836	0.0789854	Organismal Systems	Immune system
11	map05132	Salmonella infection	KEGG PATHWAY	11/291	293/17274	0.0111555	0.0805288	Human Diseases	Infectious disease: bacterial
5	map04924	Renin secretion	KEGG PATHWAY	5/291	81/17274	0.0118649	0.0806118	Organismal Systems	Endocrine system
5	map05133	Pertussis	KEGG PATHWAY	5/291	82/17274	0.0124663	0.0822776	Human Diseases	Infectious disease: bacterial
6	map05321	Inflammatory bowel disease	KEGG PATHWAY	6/291	116/17274	0.0137747	0.0883879	Human Diseases	Immune disease
6	map04666	Fc gamma R-mediated phagocytosis	KEGG PATHWAY	6/291	119/17274	0.0154575	0.0965052	Organismal Systems	Immune system
6	map05414	Dilated cardiomyopathy	KEGG PATHWAY	6/291	127/17274	0.02063	0.125409	Human Diseases	Cardiovascular disease
9	map04514	Cell adhesion molecules	KEGG PATHWAY	9/291	254/17274	0.0286299	0.169577	Environmental Information Processing	Signaling molecules and interaction
4	map00562	Inositol phosphate metabolism	KEGG PATHWAY	4/291	82/17274	0.0497061	0.273383	Metabolism	Carbohydrate metabolism
4	map05120	Epithelial cell signaling in Helicobacter pylori infection	KEGG PATHWAY	4/291	81/17274	0.0478895	0.276562	Human Diseases	Infectious disease: bacterial
9	map05130	Pathogenic Escherichia coli infection	KEGG PATHWAY	9/291	285/17274	0.0528108	0.277257	Human Diseases	Infectious disease: bacterial
3	map04973	Carbohydrate digestion and absorption	KEGG PATHWAY	3/291	50/17274	0.0519307	0.278977	Organismal Systems	Digestive system
7	map04650	Natural killer cell mediated cytotoxicity	KEGG PATHWAY	7/291	197/17274	0.0496643	0.279816	Organismal Systems	Immune system
3	map04930	Type II diabetes mellitus	KEGG PATHWAY	3/291	52/17274	0.057158	0.293411	Human Diseases	Endocrine and metabolic disease
4	map05310	Asthma	KEGG PATHWAY	4/291	87/17274	0.0593494	0.298037	Human Diseases	Immune disease
6	map04072	Phospholipase D signaling pathway	KEGG PATHWAY	6/291	167/17274	0.0637078	0.313117	Environmental Information Processing	Signal transduction
2	map04977	Vitamin digestion and absorption	KEGG PATHWAY	2/291	27/17274	0.0753513	0.362628	Organismal Systems	Digestive system
5	map05145	Toxoplasmosis	KEGG PATHWAY	5/291	135/17274	0.0783038	0.369146	Human Diseases	Infectious disease: parasitic
1	map00524	Neomycin, kanamycin and gentamicin biosynthesis	KEGG PATHWAY	1/291	5/17274	0.0814492	0.376295	Metabolism	Biosynthesis of other secondary metabolites
5	map05340	Primary immunodeficiency	KEGG PATHWAY	5/291	142/17274	0.0923445	0.410223	Human Diseases	Immune disease
4	map04361	Axon regeneration	KEGG PATHWAY	4/291	101/17274	0.0911731	0.41296	Organismal Systems	Development and regeneration
3	map00240	Pyrimidine metabolism	KEGG PATHWAY	3/291	66/17274	0.100083	0.420348	Metabolism	Nucleotide metabolism
6	map05135	Yersinia infection	KEGG PATHWAY	6/291	187/17274	0.0969488	0.42255	Human Diseases	Infectious disease: bacterial
8	map04020	Calcium signaling pathway	KEGG PATHWAY	8/291	278/17274	0.0989438	0.42326	Environmental Information Processing	Signal transduction
7	map05167	Kaposi sarcoma-associated herpesvirus infection	KEGG PATHWAY	7/291	238/17274	0.108424	0.447247	Human Diseases	Infectious disease: viral
3	map04920	Adipocytokine signaling pathway	KEGG PATHWAY	3/291	72/17274	0.121484	0.460047	Organismal Systems	Endocrine system
4	map05410	Hypertrophic cardiomyopathy	KEGG PATHWAY	4/291	111/17274	0.117957	0.46183	Human Diseases	Cardiovascular disease
4	map04970	Salivary secretion	KEGG PATHWAY	4/291	112/17274	0.120806	0.465101	Organismal Systems	Digestive system
4	map04672	Intestinal immune network for IgA production	KEGG PATHWAY	4/291	110/17274	0.115138	0.466611	Organismal Systems	Immune system
3	map05221	Acute myeloid leukemia	KEGG PATHWAY	3/291	71/17274	0.117807	0.469197	Human Diseases	Cancer: specific types
4	map04750	Inflammatory mediator regulation of TRP channels	KEGG PATHWAY	4/291	119/17274	0.141549	0.519013	Organismal Systems	Sensory system
3	map02010	ABC transporters	KEGG PATHWAY	3/291	77/17274	0.140475	0.523384	Environmental Information Processing	Membrane transport
5	map04921	Oxytocin signaling pathway	KEGG PATHWAY	5/291	168/17274	0.154554	0.549261	Organismal Systems	Endocrine system
4	map05330	Allograft rejection	KEGG PATHWAY	4/291	123/17274	0.153995	0.555826	Human Diseases	Immune disease
4	map04725	Cholinergic synapse	KEGG PATHWAY	4/291	127/17274	0.166836	0.583927	Organismal Systems	Nervous system
2	map00250	Alanine, aspartate and glutamate metabolism	KEGG PATHWAY	2/291	46/17274	0.18141	0.625458	Metabolism	Amino acid metabolism
8	map05131	Shigellosis	KEGG PATHWAY	8/291	327/17274	0.188214	0.639373	Human Diseases	Infectious disease: bacterial
4	map04933	AGE-RAGE signaling pathway in diabetic complications	KEGG PATHWAY	4/291	136/17274	0.197022	0.659597	Human Diseases	Endocrine and metabolic disease
11	map04151	PI3K-Akt signaling pathway	KEGG PATHWAY	11/291	492/17274	0.209495	0.691333	Environmental Information Processing	Signal transduction
5	map04210	Apoptosis	KEGG PATHWAY	5/291	189/17274	0.214469	0.69778	Cellular Processes	Cell growth and death
2	map04340	Hedgehog signaling pathway	KEGG PATHWAY	2/291	52/17274	0.218274	0.700295	Environmental Information Processing	Signal transduction
4	map04670	Leukocyte transendothelial migration	KEGG PATHWAY	4/291	150/17274	0.246856	0.703996	Organismal Systems	Immune system
8	map04010	MAPK signaling pathway	KEGG PATHWAY	8/291	345/17274	0.22757	0.710388	Environmental Information Processing	Signal transduction
2	map00380	Tryptophan metabolism	KEGG PATHWAY	2/291	54/17274	0.230711	0.710591	Metabolism	Amino acid metabolism
2	map04975	Fat digestion and absorption	KEGG PATHWAY	2/291	54/17274	0.230711	0.710591	Organismal Systems	Digestive system
4	map04066	HIF-1 signaling pathway	KEGG PATHWAY	4/291	144/17274	0.225134	0.71241	Environmental Information Processing	Signal transduction
3	map04978	Mineral absorption	KEGG PATHWAY	3/291	102/17274	0.246736	0.71245	Organismal Systems	Digestive system
6	map05203	Viral carcinogenesis	KEGG PATHWAY	6/291	253/17274	0.255077	0.71857	Human Diseases	Cancer: overview
2	map03460	Fanconi anemia pathway	KEGG PATHWAY	2/291	56/17274	0.243193	0.720226	Genetic Information Processing	Replication and repair
2	map01523	Antifolate resistance	KEGG PATHWAY	2/291	56/17274	0.243193	0.720226	Human Diseases	Drug resistance: antineoplastic
1	map00120	Primary bile acid biosynthesis	KEGG PATHWAY	1/291	18/17274	0.263588	0.724867	Metabolism	Lipid metabolism
5	map05161	Hepatitis B	KEGG PATHWAY	5/291	198/17274	0.242135	0.726404	Human Diseases	Infectious disease: viral
4	map04660	T cell receptor signaling pathway	KEGG PATHWAY	4/291	154/17274	0.261585	0.728025	Organismal Systems	Immune system
8	map04080	Neuroactive ligand-receptor interaction	KEGG PATHWAY	8/291	365/17274	0.274401	0.728582	Environmental Information Processing	Signaling molecules and interaction
5	map04630	JAK-STAT signaling pathway	KEGG PATHWAY	5/291	208/17274	0.27391	0.735735	Environmental Information Processing	Signal transduction
9	map05165	Human papillomavirus infection	KEGG PATHWAY	9/291	418/17274	0.273692	0.743797	Human Diseases	Infectious disease: viral
4	map04659	Th17 cell differentiation	KEGG PATHWAY	4/291	160/17274	0.283977	0.745439	Organismal Systems	Immune system
3	map04070	Phosphatidylinositol signaling system	KEGG PATHWAY	3/291	111/17274	0.28773	0.746805	Environmental Information Processing	Signal transduction
4	map05142	Chagas disease	KEGG PATHWAY	4/291	174/17274	0.337127	0.748811	Human Diseases	Infectious disease: parasitic
7	map04014	Ras signaling pathway	KEGG PATHWAY	7/291	333/17274	0.330116	0.755017	Environmental Information Processing	Signal transduction
2	map04927	Cortisol synthesis and secretion	KEGG PATHWAY	2/291	71/17274	0.336686	0.755091	Organismal Systems	Endocrine system
6	map05202	Transcriptional misregulation in cancer	KEGG PATHWAY	6/291	280/17274	0.333643	0.755604	Human Diseases	Cancer: overview
3	map04940	Type I diabetes mellitus	KEGG PATHWAY	3/291	119/17274	0.324585	0.757364	Human Diseases	Endocrine and metabolic disease
3	map04512	ECM-receptor interaction	KEGG PATHWAY	3/291	119/17274	0.324585	0.757364	Environmental Information Processing	Signaling molecules and interaction
1	map00220	Arginine biosynthesis	KEGG PATHWAY	1/291	22/17274	0.312024	0.758711	Metabolism	Amino acid metabolism
1	map00532	Glycosaminoglycan biosynthesis - chondroitin sulfate / dermatan sulfate	KEGG PATHWAY	1/291	22/17274	0.312024	0.758711	Metabolism	Glycan biosynthesis and metabolism
4	map00230	Purine metabolism	KEGG PATHWAY	4/291	165/17274	0.302849	0.760415	Metabolism	Nucleotide metabolism
5	map05322	Systemic lupus erythematosus	KEGG PATHWAY	5/291	216/17274	0.299928	0.761357	Human Diseases	Immune disease
2	map04929	GnRH secretion	KEGG PATHWAY	2/291	69/17274	0.324339	0.764513	Organismal Systems	Endocrine system
4	map04611	Platelet activation	KEGG PATHWAY	4/291	164/17274	0.299062	0.767593	Organismal Systems	Immune system
1	map00100	Steroid biosynthesis	KEGG PATHWAY	1/291	23/17274	0.323629	0.770703	Metabolism	Lipid metabolism
3	map05412	Arrhythmogenic right ventricular cardiomyopathy	KEGG PATHWAY	3/291	116/17274	0.310745	0.771849	Human Diseases	Cardiovascular disease
3	map04972	Pancreatic secretion	KEGG PATHWAY	3/291	116/17274	0.310745	0.771849	Organismal Systems	Digestive system
1	map00340	Histidine metabolism	KEGG PATHWAY	1/291	26/17274	0.357285	0.786026	Metabolism	Amino acid metabolism
4	map05206	MicroRNAs in cancer	KEGG PATHWAY	4/291	183/17274	0.371551	0.809702	Human Diseases	Cancer: overview
3	map04071	Sphingolipid signaling pathway	KEGG PATHWAY	3/291	132/17274	0.384349	0.829763	Environmental Information Processing	Signal transduction
2	map04918	Thyroid hormone synthesis	KEGG PATHWAY	2/291	80/17274	0.39128	0.836904	Organismal Systems	Endocrine system
2	map05230	Central carbon metabolism in cancer	KEGG PATHWAY	2/291	82/17274	0.403149	0.846613	Human Diseases	Cancer: overview
1	map00534	Glycosaminoglycan biosynthesis - heparan sulfate / heparin	KEGG PATHWAY	1/291	30/17274	0.399577	0.84681	Metabolism	Glycan biosynthesis and metabolism
3	map05320	Autoimmune thyroid disease	KEGG PATHWAY	3/291	138/17274	0.411573	0.84887	Human Diseases	Immune disease
1	map00592	alpha-Linolenic acid metabolism	KEGG PATHWAY	1/291	31/17274	0.40971	0.852639	Metabolism	Lipid metabolism
4	map04022	cGMP-PKG signaling pathway	KEGG PATHWAY	4/291	204/17274	0.450981	0.853908	Environmental Information Processing	Signal transduction
3	map04726	Serotonergic synapse	KEGG PATHWAY	3/291	148/17274	0.456054	0.856493	Organismal Systems	Nervous system
1	map04745	Phototransduction - fly	KEGG PATHWAY	1/291	32/17274	0.419672	0.857913	Organismal Systems	Sensory system
2	map04216	Ferroptosis	KEGG PATHWAY	2/291	90/17274	0.449463	0.858065	Cellular Processes	Cell growth and death
2	map00140	Steroid hormone biosynthesis	KEGG PATHWAY	2/291	92/17274	0.460725	0.858286	Metabolism	Lipid metabolism
2	map03320	PPAR signaling pathway	KEGG PATHWAY	2/291	89/17274	0.443782	0.86146	Organismal Systems	Endocrine system
6	map05170	Human immunodeficiency virus 1 infection	KEGG PATHWAY	6/291	332/17274	0.488749	0.861839	Human Diseases	Infectious disease: viral
1	map05020	Prion disease	KEGG PATHWAY	1/291	35/17274	0.448563	0.863484	Human Diseases	Neurodegenerative disease
2	map04971	Gastric acid secretion	KEGG PATHWAY	2/291	86/17274	0.426549	0.864324	Organismal Systems	Digestive system
5	map05205	Proteoglycans in cancer	KEGG PATHWAY	5/291	259/17274	0.442836	0.866908	Human Diseases	Cancer: overview
2	map04912	GnRH signaling pathway	KEGG PATHWAY	2/291	97/17274	0.488282	0.86764	Organismal Systems	Endocrine system
1	map04130	SNARE interactions in vesicular transport	KEGG PATHWAY	1/291	39/17274	0.484868	0.868252	Genetic Information Processing	Folding, sorting and degradation
2	map01524	Platinum drug resistance	KEGG PATHWAY	2/291	96/17274	0.482841	0.871377	Human Diseases	Drug resistance: antineoplastic
2	map04911	Insulin secretion	KEGG PATHWAY	2/291	94/17274	0.471852	0.871983	Organismal Systems	Endocrine system
1	map00051	Fructose and mannose metabolism	KEGG PATHWAY	1/291	38/17274	0.476021	0.872706	Metabolism	Carbohydrate metabolism
3	map04612	Antigen processing and presentation	KEGG PATHWAY	3/291	154/17274	0.482064	0.876825	Organismal Systems	Immune system
4	map05226	Gastric cancer	KEGG PATHWAY	4/291	219/17274	0.505742	0.878394	Human Diseases	Cancer: specific types
3	map05418	Fluid shear stress and atherosclerosis	KEGG PATHWAY	3/291	159/17274	0.503283	0.880745	Human Diseases	Cardiovascular disease
1	map00052	Galactose metabolism	KEGG PATHWAY	1/291	34/17274	0.439096	0.88201	Metabolism	Carbohydrate metabolism
1	map04966	Collecting duct acid secretion	KEGG PATHWAY	1/291	34/17274	0.439096	0.88201	Organismal Systems	Excretory system
1	map00500	Starch and sucrose metabolism	KEGG PATHWAY	1/291	34/17274	0.439096	0.88201	Metabolism	Carbohydrate metabolism
1	map00760	Nicotinate and nicotinamide metabolism	KEGG PATHWAY	1/291	51/17274	0.5801	0.887438	Metabolism	Metabolism of cofactors and vitamins
2	map05218	Melanoma	KEGG PATHWAY	2/291	102/17274	0.514945	0.887704	Human Diseases	Cancer: specific types
2	map04976	Bile secretion	KEGG PATHWAY	2/291	102/17274	0.514945	0.887704	Organismal Systems	Digestive system
1	map04624	Toll and Imd signaling pathway	KEGG PATHWAY	1/291	50/17274	0.572884	0.888162	Organismal Systems	Immune system
1	map00591	Linoleic acid metabolism	KEGG PATHWAY	1/291	44/17274	0.526917	0.888451	Metabolism	Lipid metabolism
2	map05032	Morphine addiction	KEGG PATHWAY	2/291	119/17274	0.598496	0.891953	Human Diseases	Substance dependence
2	map04931	Insulin resistance	KEGG PATHWAY	2/291	119/17274	0.598496	0.891953	Human Diseases	Endocrine and metabolic disease
3	map04261	Adrenergic signaling in cardiomyocytes	KEGG PATHWAY	3/291	182/17274	0.594644	0.891966	Organismal Systems	Circulatory system
2	map05222	Small cell lung cancer	KEGG PATHWAY	2/291	115/17274	0.579847	0.892964	Human Diseases	Cancer: specific types
5	map05163	Human cytomegalovirus infection	KEGG PATHWAY	5/291	285/17274	0.526388	0.894085	Human Diseases	Infectious disease: viral
1	map00860	Porphyrin and chlorophyll metabolism	KEGG PATHWAY	1/291	49/17274	0.565544	0.894799	Metabolism	Metabolism of cofactors and vitamins
1	map04215	Apoptosis - multiple species	KEGG PATHWAY	1/291	49/17274	0.565544	0.894799	Cellular Processes	Cell growth and death
1	map03440	Homologous recombination	KEGG PATHWAY	1/291	49/17274	0.565544	0.894799	Genetic Information Processing	Replication and repair
2	map04916	Melanogenesis	KEGG PATHWAY	2/291	106/17274	0.535606	0.896557	Organismal Systems	Endocrine system
1	map00565	Ether lipid metabolism	KEGG PATHWAY	1/291	53/17274	0.59417	0.89708	Metabolism	Lipid metabolism
2	map04925	Aldosterone synthesis and secretion	KEGG PATHWAY	2/291	112/17274	0.565449	0.900819	Organismal Systems	Endocrine system
1	map00510	N-Glycan biosynthesis	KEGG PATHWAY	1/291	57/17274	0.620915	0.902085	Metabolism	Glycan biosynthesis and metabolism
1	map00520	Amino sugar and nucleotide sugar metabolism	KEGG PATHWAY	1/291	57/17274	0.620915	0.902085	Metabolism	Carbohydrate metabolism
2	map04928	Parathyroid hormone synthesis, secretion and action	KEGG PATHWAY	2/291	118/17274	0.593893	0.902561	Organismal Systems	Endocrine system
3	map04310	Wnt signaling pathway	KEGG PATHWAY	3/291	174/17274	0.56411	0.904926	Environmental Information Processing	Signal transduction
4	map04510	Focal adhesion	KEGG PATHWAY	4/291	235/17274	0.561341	0.906782	Cellular Processes	Cellular community - eukaryotes
2	map05332	Graft-versus-host disease	KEGG PATHWAY	2/291	108/17274	0.545708	0.906896	Human Diseases	Immune disease
2	map04713	Circadian entrainment	KEGG PATHWAY	2/291	123/17274	0.616519	0.907107	Organismal Systems	Environmental adaptation
2	map04935	Growth hormone synthesis, secretion and action	KEGG PATHWAY	2/291	123/17274	0.616519	0.907107	Organismal Systems	Endocrine system
2	map00590	Arachidonic acid metabolism	KEGG PATHWAY	2/291	109/17274	0.550701	0.908657	Metabolism	Lipid metabolism
1	map04330	Notch signaling pathway	KEGG PATHWAY	1/291	59/17274	0.633622	0.90911	Environmental Information Processing	Signal transduction
1	map00330	Arginine and proline metabolism	KEGG PATHWAY	1/291	59/17274	0.633622	0.90911	Metabolism	Amino acid metabolism
2	map04350	TGF-beta signaling pathway	KEGG PATHWAY	2/291	111/17274	0.560572	0.911916	Environmental Information Processing	Signal transduction
1	map00513	Various types of N-glycan biosynthesis	KEGG PATHWAY	1/291	48/17274	0.558079	0.914299	Metabolism	Glycan biosynthesis and metabolism
10	map05200	Pathways in cancer	KEGG PATHWAY	10/291	664/17274	0.685754	0.92637	Human Diseases	Cancer: overview
1	map00480	Glutathione metabolism	KEGG PATHWAY	1/291	69/17274	0.691063	0.928114	Metabolism	Metabolism of other amino acids
3	map04141	Protein processing in endoplasmic reticulum	KEGG PATHWAY	3/291	208/17274	0.683924	0.929332	Genetic Information Processing	Folding, sorting and degradation
1	map05014	Amyotrophic lateral sclerosis	KEGG PATHWAY	1/291	76/17274	0.725841	0.931496	Human Diseases	Neurodegenerative disease
1	map04923	Regulation of lipolysis in adipocytes	KEGG PATHWAY	1/291	63/17274	0.657776	0.932185	Organismal Systems	Endocrine system
2	map04550	Signaling pathways regulating pluripotency of stem cells	KEGG PATHWAY	2/291	155/17274	0.738766	0.932541	Cellular Processes	Cellular community - eukaryotes
2	map05235	PD-L1 expression and PD-1 checkpoint pathway in cancer	KEGG PATHWAY	2/291	139/17274	0.682406	0.932757	Human Diseases	Cancer: overview
1	map00980	Metabolism of xenobiotics by cytochrome P450	KEGG PATHWAY	1/291	78/17274	0.735041	0.932936	Metabolism	Xenobiotics biodegradation and metabolism
2	map04152	AMPK signaling pathway	KEGG PATHWAY	2/291	137/17274	0.674705	0.933274	Environmental Information Processing	Signal transduction
3	map04360	Axon guidance	KEGG PATHWAY	3/291	204/17274	0.671201	0.93402	Organismal Systems	Development and regeneration
2	map05416	Viral myocarditis	KEGG PATHWAY	2/291	153/17274	0.732217	0.934487	Human Diseases	Cardiovascular disease
1	map05110	Vibrio cholerae infection	KEGG PATHWAY	1/291	67/17274	0.680342	0.935471	Human Diseases	Infectious disease: bacterial
4	map04015	Rap1 signaling pathway	KEGG PATHWAY	4/291	301/17274	0.749627	0.93602	Environmental Information Processing	Signal transduction
3	map04932	Non-alcoholic fatty liver disease	KEGG PATHWAY	3/291	222/17274	0.725562	0.93634	Human Diseases	Endocrine and metabolic disease
1	map04961	Endocrine and other factor-regulated calcium reabsorption	KEGG PATHWAY	1/291	65/17274	0.669251	0.936951	Organismal Systems	Excretory system
2	map04934	Cushing syndrome	KEGG PATHWAY	2/291	167/17274	0.775249	0.937605	Human Diseases	Endocrine and metabolic disease
2	map04724	Glutamatergic synapse	KEGG PATHWAY	2/291	135/17274	0.666853	0.939286	Organismal Systems	Nervous system
1	map05031	Amphetamine addiction	KEGG PATHWAY	1/291	81/17274	0.748267	0.9394	Human Diseases	Substance dependence
1	map00010	Glycolysis / Gluconeogenesis	KEGG PATHWAY	1/291	87/17274	0.772777	0.939534	Metabolism	Carbohydrate metabolism
1	map00830	Retinol metabolism	KEGG PATHWAY	1/291	83/17274	0.756716	0.939793	Metabolism	Metabolism of cofactors and vitamins
1	map04721	Synaptic vesicle cycle	KEGG PATHWAY	1/291	84/17274	0.760834	0.939854	Organismal Systems	Nervous system
1	map04917	Prolactin signaling pathway	KEGG PATHWAY	1/291	84/17274	0.760834	0.939854	Organismal Systems	Endocrine system
2	map04728	Dopaminergic synapse	KEGG PATHWAY	2/291	165/17274	0.769494	0.940492	Organismal Systems	Nervous system
1	map04922	Glucagon signaling pathway	KEGG PATHWAY	1/291	117/17274	0.863925	0.941352	Organismal Systems	Endocrine system
1	map05017	Spinocerebellar ataxia	KEGG PATHWAY	1/291	114/17274	0.85676	0.942436	Human Diseases	Neurodegenerative disease
2	map04270	Vascular smooth muscle contraction	KEGG PATHWAY	2/291	150/17274	0.722134	0.942446	Organismal Systems	Circulatory system
2	map04915	Estrogen signaling pathway	KEGG PATHWAY	2/291	150/17274	0.722134	0.942446	Organismal Systems	Endocrine system
2	map04974	Protein digestion and absorption	KEGG PATHWAY	2/291	204/17274	0.861121	0.942744	Organismal Systems	Digestive system
2	map04926	Relaxin signaling pathway	KEGG PATHWAY	2/291	170/17274	0.783647	0.942826	Organismal Systems	Endocrine system
2	map04723	Retrograde endocannabinoid signaling	KEGG PATHWAY	2/291	196/17274	0.845576	0.943613	Organismal Systems	Nervous system
3	map04810	Regulation of actin cytoskeleton	KEGG PATHWAY	3/291	271/17274	0.838171	0.944476	Cellular Processes	Cell motility
2	map04530	Tight junction	KEGG PATHWAY	2/291	201/17274	0.855466	0.945516	Cellular Processes	Cellular community - eukaryotes
1	map04540	Gap junction	KEGG PATHWAY	1/291	103/17274	0.827121	0.945866	Cellular Processes	Cellular community - eukaryotes
2	map04218	Cellular senescence	KEGG PATHWAY	2/291	195/17274	0.843525	0.945895	Cellular Processes	Cell growth and death
1	map04727	GABAergic synapse	KEGG PATHWAY	1/291	106/17274	0.835763	0.946379	Organismal Systems	Nervous system
2	map05225	Hepatocellular carcinoma	KEGG PATHWAY	2/291	186/17274	0.823937	0.946913	Human Diseases	Cancer: specific types
6	map05010	Alzheimer disease	KEGG PATHWAY	6/291	463/17274	0.795798	0.947574	Human Diseases	Neurodegenerative disease
2	map04150	mTOR signaling pathway	KEGG PATHWAY	2/291	190/17274	0.8329	0.947783	Environmental Information Processing	Signal transduction
1	map00564	Glycerophospholipid metabolism	KEGG PATHWAY	1/291	113/17274	0.85429	0.948754	Metabolism	Lipid metabolism
3	map04144	Endocytosis	KEGG PATHWAY	3/291	294/17274	0.875646	0.949644	Cellular Processes	Transport and catabolism
1	map00983	Drug metabolism - other enzymes	KEGG PATHWAY	1/291	95/17274	0.801796	0.94982	Metabolism	Xenobiotics biodegradation and metabolism
2	map04371	Apelin signaling pathway	KEGG PATHWAY	2/291	174/17274	0.794417	0.95083	Environmental Information Processing	Signal transduction
1	map05204	Chemical carcinogenesis	KEGG PATHWAY	1/291	97/17274	0.808455	0.952822	Human Diseases	Cancer: overview
3	map04742	Taste transduction	KEGG PATHWAY	3/291	258/17274	0.812959	0.953267	Organismal Systems	Sensory system
2	map04142	Lysosome	KEGG PATHWAY	2/291	217/17274	0.883359	0.953533	Cellular Processes	Transport and catabolism
1	map04720	Long-term potentiation	KEGG PATHWAY	1/291	74/17274	0.716323	0.956478	Organismal Systems	Nervous system
1	map04913	Ovarian steroidogenesis	KEGG PATHWAY	1/291	75/17274	0.721123	0.957353	Organismal Systems	Endocrine system
1	map04730	Long-term depression	KEGG PATHWAY	1/291	75/17274	0.721123	0.957353	Organismal Systems	Nervous system
1	map05211	Renal cell carcinoma	KEGG PATHWAY	1/291	75/17274	0.721123	0.957353	Human Diseases	Cancer: specific types
1	map04013	MAPK signaling pathway - fly	KEGG PATHWAY	1/291	101/17274	0.82111	0.957961	Environmental Information Processing	Signal transduction
1	map01521	EGFR tyrosine kinase inhibitor resistance	KEGG PATHWAY	1/291	101/17274	0.82111	0.957961	Human Diseases	Drug resistance: antineoplastic
1	map04115	p53 signaling pathway	KEGG PATHWAY	1/291	101/17274	0.82111	0.957961	Cellular Processes	Cell growth and death
1	map04260	Cardiac muscle contraction	KEGG PATHWAY	1/291	136/17274	0.901701	0.964319	Organismal Systems	Circulatory system
1	map04068	FoxO signaling pathway	KEGG PATHWAY	1/291	139/17274	0.906624	0.965116	Environmental Information Processing	Signal transduction
1	map04919	Thyroid hormone signaling pathway	KEGG PATHWAY	1/291	134/17274	0.898276	0.965125	Organismal Systems	Endocrine system
1	map04658	Th1 and Th2 cell differentiation	KEGG PATHWAY	1/291	145/17274	0.915745	0.970354	Organismal Systems	Immune system
1	map04110	Cell cycle	KEGG PATHWAY	1/291	153/17274	0.92654	0.972867	Cellular Processes	Cell growth and death
1	map04114	Oocyte meiosis	KEGG PATHWAY	1/291	152/17274	0.92527	0.97597	Cellular Processes	Cell growth and death
2	map04120	Ubiquitin mediated proteolysis	KEGG PATHWAY	2/291	269/17274	0.943235	0.977073	Genetic Information Processing	Folding, sorting and degradation
1	map04910	Insulin signaling pathway	KEGG PATHWAY	1/291	166/17274	0.94122	0.979378	Organismal Systems	Endocrine system
2	map04024	cAMP signaling pathway	KEGG PATHWAY	2/291	264/17274	0.939082	0.981575	Environmental Information Processing	Signal transduction
1	map05224	Breast cancer	KEGG PATHWAY	1/291	184/17274	0.956843	0.986744	Human Diseases	Cancer: specific types
1	map05012	Parkinson disease	KEGG PATHWAY	1/291	246/17274	0.985148	0.998111	Human Diseases	Neurodegenerative disease
1	map00190	Oxidative phosphorylation	KEGG PATHWAY	1/291	234/17274	0.981737	0.999036	Metabolism	Energy metabolism
3	map04740	Olfactory transduction	KEGG PATHWAY	3/291	796/17274	0.999887	0.999887	Organismal Systems	Sensory system
1	map04390	Hippo signaling pathway	KEGG PATHWAY	1/291	214/17274	0.974231	1	Environmental Information Processing	Signal transduction
1	map03013	RNA transport	KEGG PATHWAY	1/291	229/17274	0.980094	1	Genetic Information Processing	Translation
1	map05166	Human T-cell leukemia virus 1 infection	KEGG PATHWAY	1/291	319/17274	0.995791	1	Human Diseases	Infectious disease: viral
1	map05016	Huntington disease	KEGG PATHWAY	1/291	402/17274	0.999003	1	Human Diseases	Neurodegenerative disease
