# Supplementary material for: Differentially Expressed Genes and Signalling Pathways Regulated by High Selenium Involved in Antioxidant and Immune Functions of Goats Based on Transcriptome Sequencing
Source: Int J Mol Sci. 2023 Jan 6;24(2):1124. doi: 10.3390/ijms24021124 (PMC9864924; doi:10.3390/ijms24021124)
Supplement: Supplementary file 1 [file ijms-24-01124-s001.zip › Table S7. The gene ontology enrichment analysis.xlsx]

## Sheet: Sheet1
Table S6. The gene ontology enrichment analysis
Number	GO ID	Term Type	Description	Ratio_in_study	Ratio_in_pop	Pvalue	Padjust
6	GO:0032645	BP	regulation of granulocyte macrophage colony-stimulating factor production	6/482	12/21090	1.14e-07	0.000429151
14	GO:0050715	BP	positive regulation of cytokine secretion	14/482	92/21090	1.71e-07	0.000429151
10	GO:0042108	BP	positive regulation of cytokine biosynthetic process	10/482	51/21090	1.95e-07	0.000429151
16	GO:0002708	BP	positive regulation of lymphocyte mediated immunity	16/482	79/21090	2.26e-07	0.000429151
13	GO:0032649	BP	regulation of interferon-gamma production	13/482	79/21090	2.26e-07	0.000429151
10	GO:0002709	BP	regulation of T cell mediated immunity	10/482	52/21090	2.37e-07	0.000429151
32	GO:0009615	BP	response to virus	32/482	228/21090	3.2e-07	0.000429151
18	GO:0002705	BP	positive regulation of leukocyte mediated immunity	18/482	97/21090	3.21e-07	0.000429151
22	GO:0002703	BP	regulation of leukocyte mediated immunity	22/482	149/21090	3.26e-07	0.000429151
18	GO:0002706	BP	regulation of lymphocyte mediated immunity	18/482	115/21090	3.8e-07	0.000429151
16	GO:0002824	BP	positive regulation of adaptive immune response based on somatic recombination of immune receptors built from immunoglobulin superfamily domains	16/482	83/21090	3.94e-07	0.000429151
31	GO:0002697	BP	regulation of immune effector process	31/482	344/21090	4.14e-07	0.000429151
26	GO:0051249	BP	regulation of lymphocyte activation	26/482	322/21090	4.47e-07	0.000429151
37	GO:0001819	BP	positive regulation of cytokine production	37/482	322/21090	4.47e-07	0.000429151
31	GO:0001775	BP	cell activation	31/482	419/21090	4.65e-07	0.000429151
26	GO:0051607	BP	defense response to virus	26/482	153/21090	4.68e-07	0.000429151
23	GO:0001818	BP	negative regulation of cytokine production	23/482	192/21090	4.69e-07	0.000429151
15	GO:0050707	BP	regulation of cytokine secretion	15/482	135/21090	4.88e-07	0.000429151
21	GO:0002819	BP	regulation of adaptive immune response	21/482	135/21090	4.88e-07	0.000429151
37	GO:0002252	BP	immune effector process	37/482	371/21090	4.88e-07	0.000429151
17	GO:0070663	BP	regulation of leukocyte proliferation	17/482	173/21090	5.02e-07	0.000429151
16	GO:0002821	BP	positive regulation of adaptive immune response	16/482	85/21090	5.14e-07	0.000429151
21	GO:0050727	BP	regulation of inflammatory response	21/482	235/21090	5.19e-07	0.000429151
25	GO:0002683	BP	negative regulation of immune system process	25/482	325/21090	5.29e-07	0.000429151
9	GO:0002711	BP	positive regulation of T cell mediated immunity	9/482	33/21090	5.9e-07	0.000429151
35	GO:0050778	BP	positive regulation of immune response	35/482	376/21090	6.29e-07	0.000429151
20	GO:0050863	BP	regulation of T cell activation	20/482	238/21090	6.35e-07	0.000429151
20	GO:0050867	BP	positive regulation of cell activation	20/482	239/21090	6.79e-07	0.000429151
26	GO:0032103	BP	positive regulation of response to external stimulus	26/482	330/21090	6.96e-07	0.000429151
26	GO:0045321	BP	leukocyte activation	26/482	354/21090	7.03e-07	0.000429151
49	GO:0001817	BP	regulation of cytokine production	49/482	506/21090	7.42e-07	0.000429151
9	GO:0045071	BP	negative regulation of viral genome replication	9/482	34/21090	7.56e-07	0.000429151
7	GO:0032647	BP	regulation of interferon-alpha production	7/482	24/21090	7.7e-07	0.000429151
22	GO:0002521	BP	leukocyte differentiation	22/482	263/21090	7.74e-07	0.000429151
19	GO:0002822	BP	regulation of adaptive immune response based on somatic recombination of immune receptors built from immunoglobulin superfamily domains	19/482	122/21090	7.9e-07	0.000429151
22	GO:0031349	BP	positive regulation of defense response	22/482	220/21090	8e-07	0.000429151
29	GO:0002694	BP	regulation of leukocyte activation	29/482	381/21090	8.08e-07	0.000429151
24	GO:0045087	BP	innate immune response	24/482	242/21090	8.27e-07	0.000429151
21	GO:0006954	BP	inflammatory response	21/482	221/21090	8.57e-07	0.000429151
30	GO:0050865	BP	regulation of cell activation	30/482	407/21090	8.59e-07	0.000429151
54	GO:0098542	BP	defense response to other organism	54/482	459/21090	9.15e-07	0.000434358
22	GO:0002699	BP	positive regulation of immune effector process	22/482	161/21090	9.33e-07	0.000434358
37	GO:0031347	BP	regulation of defense response	37/482	486/21090	9.61e-07	0.000437036
66	GO:0006952	BP	defense response	66/482	673/21090	1.02e-06	0.000452638
22	GO:0006935	BP	chemotaxis	22/482	224/21090	1.05e-06	0.000457236
49	GO:0002684	BP	positive regulation of immune system process	49/482	644/21090	1.12e-06	0.000460074
16	GO:0050670	BP	regulation of lymphocyte proliferation	16/482	164/21090	1.19e-06	0.000460074
52	GO:0006955	BP	immune response	52/482	606/21090	1.24e-06	0.000460074
61	GO:0051707	BP	response to other organism	61/482	607/21090	1.24e-06	0.000460074
13	GO:0050777	BP	negative regulation of immune response	13/482	109/21090	1.26e-06	0.000460074
20	GO:1903037	BP	regulation of leukocyte cell-cell adhesion	20/482	227/21090	1.28e-06	0.000460074
22	GO:0042330	BP	taxis	22/482	227/21090	1.28e-06	0.000460074
16	GO:0032944	BP	regulation of mononuclear cell proliferation	16/482	165/21090	1.3e-06	0.000460074
22	GO:0046649	BP	lymphocyte activation	22/482	295/21090	1.34e-06	0.000460074
16	GO:0060326	BP	cell chemotaxis	16/482	146/21090	1.34e-06	0.000460074
70	GO:0002682	BP	regulation of immune system process	70/482	1062/21090	1.36e-06	0.000460074
48	GO:0050776	BP	regulation of immune response	48/482	548/21090	1.39e-06	0.000460074
5	GO:0032725	BP	positive regulation of granulocyte macrophage colony-stimulating factor production	5/482	10/21090	1.4e-06	0.000460074
16	GO:0050900	BP	leukocyte migration	16/482	147/21090	1.46e-06	0.000460074
20	GO:0009617	BP	response to bacterium	20/482	251/21090	1.46e-06	0.000460074
94	GO:0002376	BP	immune system process	94/482	1219/21090	1.47e-06	0.000460074
68	GO:0009607	BP	response to biotic stimulus	68/482	767/21090	1.47e-06	0.000460074
13	GO:0002700	BP	regulation of production of molecular mediator of immune response	13/482	111/21090	1.55e-06	0.000476412
67	GO:0044419	BP	interspecies interaction between organisms	67/482	1031/21090	1.57e-06	0.000476806
68	GO:0043207	BP	response to external biotic stimulus	68/482	736/21090	1.67e-06	0.000498278
64	GO:0023056	BP	positive regulation of signaling	64/482	1402/21090	1.69e-06	0.000498278
11	GO:0042035	BP	regulation of cytokine biosynthetic process	11/482	79/21090	1.77e-06	0.000512387
47	GO:0032101	BP	regulation of response to external stimulus	47/482	742/21090	1.84e-06	0.00052329
19	GO:0002696	BP	positive regulation of leukocyte activation	19/482	233/21090	1.9e-06	0.00052329
65	GO:0010033	BP	response to organic substance	65/482	1476/21090	1.9e-06	0.00052329
40	GO:0040011	BP	locomotion	40/482	744/21090	1.91e-06	0.00052329
55	GO:0070887	BP	cellular response to chemical stimulus	55/482	1200/21090	2.03e-06	0.00054553
78	GO:0009605	BP	response to external stimulus	78/482	1104/21090	2.09e-06	0.000550985
97	GO:0006950	BP	response to stress	97/482	2187/21090	2.24e-06	0.000576627
51	GO:0080134	BP	regulation of response to stress	51/482	1110/21090	2.28e-06	0.000576627
67	GO:0051240	BP	positive regulation of multicellular organismal process	67/482	1326/21090	2.31e-06	0.000577727
5	GO:0035589	BP	G protein-coupled purinergic nucleotide receptor signaling pathway	5/482	11/21090	2.52e-06	0.000622335
64	GO:0010647	BP	positive regulation of cell communication	64/482	1396/21090	2.58e-06	0.000630063
103	GO:0010646	BP	regulation of cell communication	103/482	2734/21090	2.63e-06	0.000634998
47	GO:0071310	BP	cellular response to organic substance	47/482	979/21090	2.78e-06	0.000659897
9	GO:0032729	BP	positive regulation of interferon-gamma production	9/482	53/21090	2.86e-06	0.000666718
103	GO:0051239	BP	regulation of multicellular organismal process	103/482	2412/21090	2.97e-06	0.0006734
83	GO:0048584	BP	positive regulation of response to stimulus	83/482	1664/21090	2.99e-06	0.0006734
10	GO:0048525	BP	negative regulation of viral process	10/482	68/21090	3.14e-06	0.000699107
38	GO:0051050	BP	positive regulation of transport	38/482	735/21090	3.3e-06	0.000726821
133	GO:0048583	BP	regulation of response to stimulus	133/482	3138/21090	3.73e-06	0.000803486
103	GO:0023051	BP	regulation of signaling	103/482	2752/21090	3.89e-06	0.000812155
9	GO:1903901	BP	negative regulation of viral life cycle	9/482	55/21090	3.95e-06	0.000812155
168	GO:0048518	BP	positive regulation of biological process	168/482	5041/21090	4e-06	0.000812155
151	GO:0050896	BP	response to stimulus	151/482	4558/21090	4.04e-06	0.000812155
6	GO:0002861	BP	regulation of inflammatory response to antigenic stimulus	6/482	20/21090	4.08e-06	0.000812155
6	GO:0032727	BP	positive regulation of interferon-alpha production	6/482	20/21090	4.08e-06	0.000812155
91	GO:0009966	BP	regulation of signal transduction	91/482	2402/21090	4.1e-06	0.000812155
9	GO:0070664	BP	negative regulation of leukocyte proliferation	9/482	56/21090	4.61e-06	0.000904391
62	GO:0007166	BP	cell surface receptor signaling pathway	62/482	1470/21090	4.85e-06	0.000924264
73	GO:0042221	BP	response to chemical	73/482	1828/21090	5.35e-06	0.00101015
17	GO:0051251	BP	positive regulation of lymphocyte activation	17/482	206/21090	5.59e-06	0.00102818
84	GO:0032879	BP	regulation of localization	84/482	2236/21090	5.96e-06	0.00107477
13	GO:0002695	BP	negative regulation of leukocyte activation	13/482	126/21090	6.45e-06	0.0011523
21	GO:0002831	BP	regulation of response to biotic stimulus	21/482	301/21090	6.58e-06	0.00116605
5	GO:0002830	BP	positive regulation of type 2 immune response	5/482	13/21090	6.75e-06	0.00116986
12	GO:0051250	BP	negative regulation of lymphocyte activation	12/482	108/21090	6.78e-06	0.00116986
149	GO:0048522	BP	positive regulation of cellular process	149/482	4636/21090	7.78e-06	0.00131892
25	GO:0014070	BP	response to organic cyclic compound	25/482	406/21090	8.09e-06	0.0013501
13	GO:0042129	BP	regulation of T cell proliferation	13/482	129/21090	8.36e-06	0.00138229
32	GO:0016477	BP	cell migration	32/482	596/21090	8.82e-06	0.00144628
16	GO:0030098	BP	lymphocyte differentiation	16/482	192/21090	9.29e-06	0.00149961
20	GO:0051047	BP	positive regulation of secretion	20/482	286/21090	1.05e-05	0.0016711
9	GO:0002718	BP	regulation of cytokine production involved in immune response	9/482	62/21090	1.09e-05	0.00172286
18	GO:0071407	BP	cellular response to organic cyclic compound	18/482	241/21090	1.19e-05	0.00185014
7	GO:0032653	BP	regulation of interleukin-10 production	7/482	35/21090	1.2e-05	0.00185415
9	GO:0032755	BP	positive regulation of interleukin-6 production	9/482	63/21090	1.25e-05	0.00190967
11	GO:0050729	BP	positive regulation of inflammatory response	11/482	98/21090	1.48e-05	0.00223252
16	GO:0002793	BP	positive regulation of peptide secretion	16/482	200/21090	1.55e-05	0.00230012
6	GO:0002673	BP	regulation of acute inflammatory response	6/482	25/21090	1.69e-05	0.00248848
11	GO:0032675	BP	regulation of interleukin-6 production	11/482	100/21090	1.8e-05	0.00262972
19	GO:1903532	BP	positive regulation of secretion by cell	19/482	275/21090	2.06e-05	0.00294754
6	GO:0002828	BP	regulation of type 2 immune response	6/482	26/21090	2.16e-05	0.00301756
6	GO:0046640	BP	regulation of alpha-beta T cell proliferation	6/482	26/21090	2.16e-05	0.00301756
6	GO:0035590	BP	purinergic nucleotide receptor signaling pathway	6/482	26/21090	2.16e-05	0.00301756
13	GO:0050866	BP	negative regulation of cell activation	13/482	141/21090	2.19e-05	0.00304331
20	GO:0022407	BP	regulation of cell-cell adhesion	20/482	301/21090	2.21e-05	0.00305024
53	GO:0048585	BP	negative regulation of response to stimulus	53/482	1260/21090	2.27e-05	0.00311448
13	GO:0050731	BP	positive regulation of peptidyl-tyrosine phosphorylation	13/482	143/21090	2.54e-05	0.00342097
20	GO:1903706	BP	regulation of hemopoiesis	20/482	304/21090	2.55e-05	0.00342097
13	GO:0002833	BP	positive regulation of response to biotic stimulus	13/482	144/21090	2.74e-05	0.0036551
15	GO:0050714	BP	positive regulation of protein secretion	15/482	187/21090	2.76e-05	0.0036569
8	GO:0050672	BP	negative regulation of lymphocyte proliferation	8/482	54/21090	2.9e-05	0.00377424
8	GO:0032945	BP	negative regulation of mononuclear cell proliferation	8/482	54/21090	2.9e-05	0.00377424
52	GO:0009967	BP	positive regulation of signal transduction	52/482	1245/21090	3.18e-05	0.00410219
9	GO:0002221	BP	pattern recognition receptor signaling pathway	9/482	71/21090	3.35e-05	0.00426643
9	GO:0045069	BP	regulation of viral genome replication	9/482	71/21090	3.35e-05	0.00426643
52	GO:0042127	BP	regulation of cell population proliferation	52/482	1254/21090	3.43e-05	0.00434754
28	GO:0030155	BP	regulation of cell adhesion	28/482	523/21090	3.58e-05	0.00450117
11	GO:0030217	BP	T cell differentiation	11/482	108/21090	3.72e-05	0.00465681
58	GO:0051049	BP	regulation of transport	58/482	1463/21090	3.87e-05	0.00474851
12	GO:1902107	BP	positive regulation of leukocyte differentiation	12/482	129/21090	4.13e-05	0.00494885
8	GO:0032481	BP	positive regulation of type I interferon production	8/482	57/21090	4.34e-05	0.00511424
16	GO:1902105	BP	regulation of leukocyte differentiation	16/482	218/21090	4.46e-05	0.0052205
14	GO:0042742	BP	defense response to bacterium	14/482	173/21090	4.61e-05	0.00536301
7	GO:0001910	BP	regulation of leukocyte mediated cytotoxicity	7/482	43/21090	4.93e-05	0.00570211
4	GO:0046007	BP	negative regulation of activated T cell proliferation	4/482	10/21090	5.07e-05	0.00580154
9	GO:0002702	BP	positive regulation of production of molecular mediator of immune response	9/482	75/21090	5.21e-05	0.00587423
5	GO:0031109	BP	microtubule polymerization or depolymerization	5/482	19/21090	5.45e-05	0.00609149
8	GO:0032642	BP	regulation of chemokine production	8/482	59/21090	5.6e-05	0.00622829
33	GO:0048870	BP	cell motility	33/482	674/21090	5.69e-05	0.00629236
10	GO:0030595	BP	leukocyte chemotaxis	10/482	94/21090	5.76e-05	0.00629953
6	GO:0001912	BP	positive regulation of leukocyte mediated cytotoxicity	6/482	31/21090	6.26e-05	0.00677071
6	GO:0032728	BP	positive regulation of interferon-beta production	6/482	31/21090	6.26e-05	0.00677071
9	GO:0046634	BP	regulation of alpha-beta T cell activation	9/482	77/21090	6.42e-05	0.00691254
11	GO:1903900	BP	regulation of viral life cycle	11/482	115/21090	6.65e-05	0.00710395
7	GO:0032648	BP	regulation of interferon-beta production	7/482	45/21090	6.67e-05	0.00710395
13	GO:0045088	BP	regulation of innate immune response	13/482	158/21090	7.21e-05	0.00759848
6	GO:0046006	BP	regulation of activated T cell proliferation	6/482	32/21090	7.55e-05	0.00791673
13	GO:1903039	BP	positive regulation of leukocyte cell-cell adhesion	13/482	160/21090	8.2e-05	0.00850884
10	GO:0071222	BP	cellular response to lipopolysaccharide	10/482	99/21090	8.97e-05	0.00925168
5	GO:2000778	BP	positive regulation of interleukin-6 secretion	5/482	21/21090	9.18e-05	0.00937463
5	GO:0070230	BP	positive regulation of lymphocyte apoptotic process	5/482	21/21090	9.18e-05	0.00937463
79	GO:0051716	BP	cellular response to stimulus	79/482	2244/21090	9.38e-05	0.00953098
9	GO:0032479	BP	regulation of type I interferon production	9/482	81/21090	9.58e-05	0.00959212
9	GO:0014074	BP	response to purine-containing compound	9/482	81/21090	9.58e-05	0.00959212
47	GO:0042592	BP	homeostatic process	47/482	1146/21090	9.86e-05	0.00981424
7	GO:0002712	BP	regulation of B cell mediated immunity	7/482	48/21090	0.000102055	0.0101125
9	GO:0050868	BP	negative regulation of T cell activation	9/482	82/21090	0.000105517	0.0103531
6	GO:0032732	BP	positive regulation of interleukin-1 production	6/482	34/21090	0.000107864	0.0105318
3	GO:0045354	BP	regulation of interferon-alpha biosynthetic process	3/482	5/21090	0.000114643	0.0111393
4	GO:0002863	BP	positive regulation of inflammatory response to antigenic stimulus	4/482	12/21090	0.000115284	0.0111475
5	GO:0032733	BP	positive regulation of interleukin-10 production	5/482	22/21090	0.000116577	0.0112183
26	GO:0008285	BP	negative regulation of cell population proliferation	26/482	507/21090	0.000125942	0.0120615
12	GO:0031348	BP	negative regulation of defense response	12/482	146/21090	0.000137065	0.0130024
14	GO:0042110	BP	T cell activation	14/482	192/21090	0.000141346	0.0133452
5	GO:0050716	BP	positive regulation of interleukin-1 secretion	5/482	23/21090	0.000146176	0.0136868
53	GO:1902531	BP	regulation of intracellular signal transduction	53/482	1355/21090	0.000146332	0.0136868
10	GO:0050864	BP	regulation of B cell activation	10/482	105/21090	0.000147031	0.0136882
6	GO:0002891	BP	positive regulation of immunoglobulin mediated immune response	6/482	36/21090	0.000150296	0.0137712
6	GO:0002714	BP	positive regulation of B cell mediated immunity	6/482	36/21090	0.000150296	0.0137712
7	GO:0030888	BP	regulation of B cell proliferation	7/482	51/21090	0.000151284	0.0137712
13	GO:0043903	BP	regulation of symbiotic process	13/482	170/21090	0.000151362	0.0137712
21	GO:1904951	BP	positive regulation of establishment of protein localization	21/482	374/21090	0.000156618	0.0141849
10	GO:0071219	BP	cellular response to molecule of bacterial origin	10/482	106/21090	0.000159092	0.0142797
10	GO:1903555	BP	regulation of tumor necrosis factor superfamily cytokine production	10/482	106/21090	0.000159092	0.0142797
4	GO:0071637	BP	regulation of monocyte chemotactic protein-1 production	4/482	13/21090	0.00016352	0.0146117
34	GO:1902533	BP	positive regulation of intracellular signal transduction	34/482	756/21090	0.000170591	0.0151758
7	GO:0034103	BP	regulation of tissue remodeling	7/482	52/21090	0.000171416	0.0151817
6	GO:0072676	BP	lymphocyte migration	6/482	37/21090	0.000175955	0.0155151
14	GO:0002237	BP	response to molecule of bacterial origin	14/482	197/21090	0.000185023	0.0161721
12	GO:0050870	BP	positive regulation of T cell activation	12/482	152/21090	0.000200267	0.0173634
10	GO:0009612	BP	response to mechanical stimulus	10/482	109/21090	0.000200387	0.0173634
59	GO:2000026	BP	regulation of multicellular organismal development	59/482	1573/21090	0.000203543	0.0175608
14	GO:0050730	BP	regulation of peptidyl-tyrosine phosphorylation	14/482	199/21090	0.000205505	0.017654
10	GO:0002250	BP	adaptive immune response	10/482	110/21090	0.00021601	0.0184772
4	GO:0035455	BP	response to interferon-alpha	4/482	14/21090	0.000224804	0.0189554
3	GO:0045357	BP	regulation of interferon-beta biosynthetic process	3/482	6/21090	0.000225389	0.0189554
3	GO:0046785	BP	microtubule polymerization	3/482	6/21090	0.000225389	0.0189554
6	GO:0002886	BP	regulation of myeloid leukocyte mediated immunity	6/482	39/21090	0.000237589	0.0198978
6	GO:1903202	BP	negative regulation of oxidative stress-induced cell death	6/482	40/21090	0.000274178	0.0225842
6	GO:1900408	BP	negative regulation of cellular response to oxidative stress	6/482	40/21090	0.000274178	0.0225842
6	GO:0031343	BP	positive regulation of cell killing	6/482	40/21090	0.000274178	0.0225842
13	GO:0032496	BP	response to lipopolysaccharide	13/482	181/21090	0.00028085	0.0230389
11	GO:0045619	BP	regulation of lymphocyte differentiation	11/482	136/21090	0.000296788	0.024247
9	GO:1903038	BP	negative regulation of leukocyte cell-cell adhesion	9/482	94/21090	0.000300959	0.0243112
4	GO:0032693	BP	negative regulation of interleukin-10 production	4/482	15/21090	0.000301033	0.0243112
16	GO:0032102	BP	negative regulation of response to external stimulus	16/482	257/21090	0.000301217	0.0243112
7	GO:0031341	BP	regulation of cell killing	7/482	57/21090	0.000307097	0.0245874
7	GO:0046427	BP	positive regulation of receptor signaling pathway via JAK-STAT	7/482	57/21090	0.000307097	0.0245874
6	GO:0060760	BP	positive regulation of response to cytokine stimulus	6/482	41/21090	0.000315049	0.0250239
6	GO:1902883	BP	negative regulation of response to oxidative stress	6/482	41/21090	0.000315049	0.0250239
12	GO:0050792	BP	regulation of viral process	12/482	160/21090	0.000321917	0.0254683
5	GO:0032814	BP	regulation of natural killer cell activation	5/482	27/21090	0.000325253	0.0256309
13	GO:0022409	BP	positive regulation of cell-cell adhesion	13/482	184/21090	0.000329392	0.0258553
19	GO:0002791	BP	regulation of peptide secretion	19/482	340/21090	0.000337543	0.0263448
8	GO:0019722	BP	calcium-mediated signaling	8/482	76/21090	0.000339576	0.0263448
8	GO:0097529	BP	myeloid leukocyte migration	8/482	76/21090	0.000339576	0.0263448
6	GO:0032722	BP	positive regulation of chemokine production	6/482	42/21090	0.000360544	0.0277563
3	GO:2000551	BP	regulation of T-helper 2 cell cytokine production	3/482	7/21090	0.000387734	0.0294616
5	GO:2000108	BP	positive regulation of leukocyte apoptotic process	5/482	28/21090	0.000388582	0.0294616
5	GO:0002724	BP	regulation of T cell cytokine production	5/482	28/21090	0.000388582	0.0294616
4	GO:0035456	BP	response to interferon-beta	4/482	16/21090	0.000394157	0.0297715
12	GO:1903708	BP	positive regulation of hemopoiesis	12/482	164/21090	0.00040318	0.0303386
6	GO:0071260	BP	cellular response to mechanical stimulus	6/482	43/21090	0.000411018	0.0307897
18	GO:0050708	BP	regulation of protein secretion	18/482	318/21090	0.000412252	0.0307897
7	GO:1904894	BP	positive regulation of receptor signaling pathway via STAT	7/482	60/21090	0.000422988	0.0314216
31	GO:0008284	BP	positive regulation of cell population proliferation	31/482	698/21090	0.000428959	0.0316828
39	GO:0051241	BP	negative regulation of multicellular organismal process	39/482	943/21090	0.00046408	0.0334922
6	GO:0042130	BP	negative regulation of T cell proliferation	6/482	44/21090	0.000466842	0.0334922
43	GO:0051094	BP	positive regulation of developmental process	43/482	1077/21090	0.000477577	0.0341399
4	GO:0042832	BP	defense response to protozoan	4/482	17/21090	0.000506173	0.0359275
4	GO:0002675	BP	positive regulation of acute inflammatory response	4/482	17/21090	0.000506173	0.0359275
7	GO:1900407	BP	regulation of cellular response to oxidative stress	7/482	62/21090	0.000517951	0.036228
2	GO:1905335	BP	regulation of aggrephagy	2/482	2/21090	0.000521266	0.036228
2	GO:1905337	BP	positive regulation of aggrephagy	2/482	2/21090	0.000521266	0.036228
2	GO:0034124	BP	regulation of MyD88-dependent toll-like receptor signaling pathway	2/482	2/21090	0.000521266	0.036228
25	GO:1903530	BP	regulation of secretion by cell	25/482	524/21090	0.000535854	0.0369934
5	GO:0032731	BP	positive regulation of interleukin-1 beta production	5/482	30/21090	0.000542662	0.0371983
41	GO:0006928	BP	movement of cell or subcellular component	41/482	1029/21090	0.00055291	0.037643
12	GO:0001525	BP	angiogenesis	12/482	170/21090	0.000557174	0.0378047
10	GO:0071216	BP	cellular response to biotic stimulus	10/482	124/21090	0.000566399	0.0383008
7	GO:1901224	BP	positive regulation of NIK/NF-kappaB signaling	7/482	63/21090	0.000571404	0.0385092
6	GO:0046631	BP	alpha-beta T cell activation	6/482	46/21090	0.000596084	0.0400376
3	GO:0071415	BP	cellular response to purine-containing compound	3/482	8/21090	0.000609852	0.0404199
3	GO:1902741	BP	positive regulation of interferon-alpha secretion	3/482	8/21090	0.000609852	0.0404199
3	GO:0060693	BP	regulation of branching involved in salivary gland morphogenesis	3/482	8/21090	0.000609852	0.0404199
5	GO:0032743	BP	positive regulation of interleukin-2 production	5/482	31/21090	0.000634985	0.0413992
9	GO:0032680	BP	regulation of tumor necrosis factor production	9/482	104/21090	0.000636248	0.0413992
4	GO:0002922	BP	positive regulation of humoral immune response	4/482	18/21090	0.000639106	0.0413992
4	GO:0002825	BP	regulation of T-helper 1 type immune response	4/482	18/21090	0.000639106	0.0413992
4	GO:0002726	BP	positive regulation of T cell cytokine production	4/482	18/21090	0.000639106	0.0413992
4	GO:0046641	BP	positive regulation of alpha-beta T cell proliferation	4/482	18/21090	0.000639106	0.0413992
4	GO:0001562	BP	response to protozoan	4/482	18/21090	0.000639106	0.0413992
6	GO:0002889	BP	regulation of immunoglobulin mediated immune response	6/482	47/21090	0.000670305	0.0429288
6	GO:0035690	BP	cellular response to drug	6/482	47/21090	0.000670305	0.0429288
9	GO:0060759	BP	regulation of response to cytokine stimulus	9/482	105/21090	0.000682113	0.0434814
26	GO:0051046	BP	regulation of secretion	26/482	556/21090	0.000721569	0.0457055
8	GO:1901222	BP	regulation of NIK/NF-kappaB signaling	8/482	85/21090	0.000725044	0.0457807
295	GO:0065007	BP	biological regulation	295/482	11295/21090	0.000729919	0.0459116
5	GO:0002920	BP	regulation of humoral immune response	5/482	32/21090	0.000738586	0.0459116
5	GO:0051209	BP	release of sequestered calcium ion into cytosol	5/482	32/21090	0.000738586	0.0459116
21	GO:0033993	BP	response to lipid	21/482	418/21090	0.000742592	0.0460177
6	GO:0002449	BP	lymphocyte mediated immunity	6/482	49/21090	0.000840052	0.0515782
10	GO:0045766	BP	positive regulation of angiogenesis	10/482	131/21090	0.000869336	0.0531728
17	GO:0045785	BP	positive regulation of cell adhesion	17/482	311/21090	0.000871336	0.0531728
3	GO:0036037	BP	CD8-positive, alpha-beta T cell activation	3/482	9/21090	0.000899282	0.0543807
3	GO:1902739	BP	regulation of interferon-alpha secretion	3/482	9/21090	0.000899282	0.0543807
19	GO:0051222	BP	positive regulation of protein transport	19/482	360/21090	0.000904048	0.0545043
7	GO:0046683	BP	response to organophosphorus	7/482	68/21090	0.000907999	0.0545781
6	GO:0032663	BP	regulation of interleukin-2 production	6/482	50/21090	0.000936453	0.0561199
5	GO:0050704	BP	regulation of interleukin-1 secretion	5/482	34/21090	0.000983	0.058385
48	GO:0010941	BP	regulation of cell death	48/482	1292/21090	0.000989794	0.0585115
7	GO:1902882	BP	regulation of response to oxidative stress	7/482	69/21090	0.000990977	0.0585115
6	GO:0032677	BP	regulation of interleukin-8 production	6/482	51/21090	0.00104114	0.06058
6	GO:0046635	BP	positive regulation of alpha-beta T cell activation	6/482	51/21090	0.00104114	0.06058
6	GO:0070228	BP	regulation of lymphocyte apoptotic process	6/482	51/21090	0.00104114	0.06058
5	GO:0032757	BP	positive regulation of interleukin-8 production	5/482	35/21090	0.00112555	0.0645532
5	GO:0002720	BP	positive regulation of cytokine production involved in immune response	5/482	35/21090	0.00112555	0.0645532
5	GO:0046850	BP	regulation of bone remodeling	5/482	35/21090	0.00112555	0.0645532
5	GO:0051283	BP	negative regulation of sequestering of calcium ion	5/482	35/21090	0.00112555	0.0645532
9	GO:0051092	BP	positive regulation of NF-kappaB transcription factor activity	9/482	113/21090	0.00115492	0.06586
9	GO:0045089	BP	positive regulation of innate immune response	9/482	113/21090	0.00115492	0.06586
4	GO:0050718	BP	positive regulation of interleukin-1 beta secretion	4/482	21/21090	0.00118398	0.0673251
8	GO:0050691	BP	regulation of defense response to virus by host	8/482	92/21090	0.00122104	0.0692361
3	GO:0045078	BP	positive regulation of interferon-gamma biosynthetic process	3/482	10/21090	0.00126295	0.07022
3	GO:0045080	BP	positive regulation of chemokine biosynthetic process	3/482	10/21090	0.00126295	0.07022
3	GO:0032736	BP	positive regulation of interleukin-13 production	3/482	10/21090	0.00126295	0.07022
3	GO:0002839	BP	positive regulation of immune response to tumor cell	3/482	10/21090	0.00126295	0.07022
3	GO:0002836	BP	positive regulation of response to tumor cell	3/482	10/21090	0.00126295	0.07022
3	GO:0010623	BP	programmed cell death involved in cell development	3/482	10/21090	0.00126295	0.07022
7	GO:0050871	BP	positive regulation of B cell activation	7/482	72/21090	0.00127614	0.0702351
6	GO:1903201	BP	regulation of oxidative stress-induced cell death	6/482	53/21090	0.00127726	0.0702351
6	GO:0097530	BP	granulocyte migration	6/482	53/21090	0.00127726	0.0702351
6	GO:0060401	BP	cytosolic calcium ion transport	6/482	53/21090	0.00127726	0.0702351
5	GO:0045824	BP	negative regulation of innate immune response	5/482	36/21090	0.00128285	0.0703495
9	GO:0010467	BP	gene expression	9/482	115/21090	0.00130715	0.0714858
10	GO:0070588	BP	calcium ion transmembrane transport	10/482	139/21090	0.00136677	0.0743404
69	GO:0050793	BP	regulation of developmental process	69/482	2057/21090	0.00137372	0.074516
4	GO:0031295	BP	T cell costimulation	4/482	22/21090	0.00142117	0.0766745
21	GO:0034762	BP	regulation of transmembrane transport	21/482	431/21090	0.00148745	0.0798196
2	GO:0010716	BP	negative regulation of extracellular matrix disassembly	2/482	3/21090	0.00154007	0.0800676
2	GO:0039528	BP	cytoplasmic pattern recognition receptor signaling pathway in response to virus	2/482	3/21090	0.00154007	0.0800676
2	GO:0060557	BP	positive regulation of vitamin D biosynthetic process	2/482	3/21090	0.00154007	0.0800676
2	GO:0060559	BP	positive regulation of calcidiol 1-monooxygenase activity	2/482	3/21090	0.00154007	0.0800676
2	GO:0045590	BP	negative regulation of regulatory T cell differentiation	2/482	3/21090	0.00154007	0.0800676
2	GO:2001106	BP	regulation of Rho guanyl-nucleotide exchange factor activity	2/482	3/21090	0.00154007	0.0800676
2	GO:2000556	BP	positive regulation of T-helper 1 cell cytokine production	2/482	3/21090	0.00154007	0.0800676
2	GO:2000554	BP	regulation of T-helper 1 cell cytokine production	2/482	3/21090	0.00154007	0.0800676
2	GO:1904475	BP	regulation of Ras GTPase binding	2/482	3/21090	0.00154007	0.0800676
2	GO:0046136	BP	positive regulation of vitamin metabolic process	2/482	3/21090	0.00154007	0.0800676
6	GO:0032760	BP	positive regulation of tumor necrosis factor production	6/482	55/21090	0.00155223	0.0804909
122	GO:0007165	BP	signal transduction	122/482	4104/21090	0.00162847	0.0840091
5	GO:0046632	BP	alpha-beta T cell differentiation	5/482	38/21090	0.00164533	0.0842273
5	GO:0007159	BP	leukocyte cell-cell adhesion	5/482	38/21090	0.00164533	0.0842273
5	GO:0097553	BP	calcium ion transmembrane import into cytosol	5/482	38/21090	0.00164533	0.0842273
9	GO:0050688	BP	regulation of defense response to virus	9/482	119/21090	0.00166007	0.0847651
26	GO:0070201	BP	regulation of establishment of protein localization	26/482	585/21090	0.00167148	0.0851305
4	GO:0002888	BP	positive regulation of myeloid leukocyte mediated immunity	4/482	23/21090	0.0016896	0.0854286
4	GO:0031294	BP	lymphocyte costimulation	4/482	23/21090	0.0016896	0.0854286
10	GO:1904018	BP	positive regulation of vasculature development	10/482	143/21090	0.00169084	0.0854286
280	GO:0050789	BP	regulation of biological process	280/482	10748/21090	0.0016992	0.0854286
6	GO:0032652	BP	regulation of interleukin-1 production	6/482	56/21090	0.00170553	0.0854286
6	GO:1903557	BP	positive regulation of tumor necrosis factor superfamily cytokine production	6/482	56/21090	0.00170553	0.0854286
3	GO:0045086	BP	positive regulation of interleukin-2 biosynthetic process	3/482	11/21090	0.00170721	0.0854286
14	GO:0071396	BP	cellular response to lipid	14/482	248/21090	0.00179526	0.0896106
12	GO:0006816	BP	calcium ion transport	12/482	196/21090	0.00190957	0.0948435
4	GO:0032673	BP	regulation of interleukin-4 production	4/482	24/21090	0.00199128	0.0981709
4	GO:0048247	BP	lymphocyte chemotaxis	4/482	24/21090	0.00199128	0.0981709
5	GO:0032655	BP	regulation of interleukin-12 production	5/482	40/21090	0.0020778	0.101897
5	GO:0060402	BP	calcium ion transport into cytosol	5/482	40/21090	0.0020778	0.101897
32	GO:0048878	BP	chemical homeostasis	32/482	787/21090	0.00208212	0.101897
38	GO:0009968	BP	negative regulation of signal transduction	38/482	994/21090	0.00211914	0.10343
11	GO:0043122	BP	regulation of I-kappaB kinase/NF-kappaB signaling	11/482	173/21090	0.00216539	0.104945
7	GO:0048660	BP	regulation of smooth muscle cell proliferation	7/482	79/21090	0.00219116	0.105683
7	GO:0001816	BP	cytokine production	7/482	79/21090	0.00219116	0.105683
45	GO:0035556	BP	intracellular signal transduction	45/482	1238/21090	0.00221094	0.10638
6	GO:0010827	BP	regulation of glucose transmembrane transport	6/482	59/21090	0.00223484	0.106396
3	GO:0045072	BP	regulation of interferon-gamma biosynthetic process	3/482	12/21090	0.00223785	0.106396
40	GO:0010648	BP	negative regulation of cell communication	40/482	1073/21090	0.00225185	0.106808
4	GO:0032735	BP	positive regulation of interleukin-12 production	4/482	25/21090	0.00232823	0.109651
4	GO:0050869	BP	negative regulation of B cell activation	4/482	25/21090	0.00232823	0.109651
12	GO:0007162	BP	negative regulation of cell adhesion	12/482	201/21090	0.00235433	0.110363
7	GO:0045621	BP	positive regulation of lymphocyte differentiation	7/482	80/21090	0.00235503	0.110363
8	GO:0050671	BP	positive regulation of lymphocyte proliferation	8/482	102/21090	0.0023617	0.110363
8	GO:0032946	BP	positive regulation of mononuclear cell proliferation	8/482	103/21090	0.00251065	0.116868
6	GO:0002443	BP	leukocyte mediated immunity	6/482	61/21090	0.00265081	0.122821
12	GO:0070372	BP	regulation of ERK1 and ERK2 cascade	12/482	204/21090	0.00265948	0.122938
4	GO:0032689	BP	negative regulation of interferon-gamma production	4/482	26/21090	0.00270244	0.12435
9	GO:0007204	BP	positive regulation of cytosolic calcium ion concentration	9/482	128/21090	0.00273504	0.125274
3	GO:0045073	BP	regulation of chemokine biosynthetic process	3/482	13/21090	0.00286014	0.12836
3	GO:0032656	BP	regulation of interleukin-13 production	3/482	13/21090	0.00286014	0.12836
3	GO:0032823	BP	regulation of natural killer cell differentiation	3/482	13/21090	0.00286014	0.12836
3	GO:0030889	BP	negative regulation of B cell proliferation	3/482	13/21090	0.00286014	0.12836
3	GO:0001916	BP	positive regulation of T cell mediated cytotoxicity	3/482	13/21090	0.00286014	0.12836
3	GO:0032740	BP	positive regulation of interleukin-17 production	3/482	13/21090	0.00286014	0.12836
3	GO:0002834	BP	regulation of response to tumor cell	3/482	13/21090	0.00286014	0.12836
3	GO:0002837	BP	regulation of immune response to tumor cell	3/482	13/21090	0.00286014	0.12836
11	GO:0019932	BP	second-messenger-mediated signaling	11/482	180/21090	0.00294597	0.131141
19	GO:0034097	BP	response to cytokine	19/482	393/21090	0.00295866	0.131141
2	GO:0002904	BP	positive regulation of B cell apoptotic process	2/482	4/21090	0.00303349	0.131141
2	GO:1905097	BP	regulation of guanyl-nucleotide exchange factor activity	2/482	4/21090	0.00303349	0.131141
2	GO:0051142	BP	positive regulation of NK T cell proliferation	2/482	4/21090	0.00303349	0.131141
2	GO:0060665	BP	regulation of branching involved in salivary gland morphogenesis by mesenchymal-epithelial signaling	2/482	4/21090	0.00303349	0.131141
2	GO:0045356	BP	positive regulation of interferon-alpha biosynthetic process	2/482	4/21090	0.00303349	0.131141
2	GO:0035744	BP	T-helper 1 cell cytokine production	2/482	4/21090	0.00303349	0.131141
2	GO:0002678	BP	positive regulation of chronic inflammatory response	2/482	4/21090	0.00303349	0.131141
2	GO:0030730	BP	sequestering of triglyceride	2/482	4/21090	0.00303349	0.131141
2	GO:0051450	BP	myoblast proliferation	2/482	4/21090	0.00303349	0.131141
2	GO:0070948	BP	regulation of neutrophil mediated cytotoxicity	2/482	4/21090	0.00303349	0.131141
40	GO:0023057	BP	negative regulation of signaling	40/482	1076/21090	0.00310551	0.133359
7	GO:0030183	BP	B cell differentiation	7/482	84/21090	0.00310679	0.133359
4	GO:0110111	BP	negative regulation of animal organ morphogenesis	4/482	27/21090	0.00311587	0.133359
6	GO:0002832	BP	negative regulation of response to biotic stimulus	6/482	63/21090	0.00312226	0.133359
5	GO:0042531	BP	positive regulation of tyrosine phosphorylation of STAT protein	5/482	44/21090	0.00318282	0.135548
9	GO:0034764	BP	positive regulation of transmembrane transport	9/482	131/21090	0.00319556	0.135801
17	GO:0012501	BP	programmed cell death	17/482	349/21090	0.00324977	0.137812
13	GO:0070838	BP	divalent metal ion transport	13/482	237/21090	0.00330107	0.139692
11	GO:0032147	BP	activation of protein kinase activity	11/482	183/21090	0.00334329	0.14118
8	GO:0007605	BP	sensory perception of sound	8/482	108/21090	0.00336897	0.141965
13	GO:0072511	BP	divalent inorganic cation transport	13/482	238/21090	0.00342136	0.143568
5	GO:0048661	BP	positive regulation of smooth muscle cell proliferation	5/482	45/21090	0.00351462	0.147094
9	GO:0022408	BP	negative regulation of cell-cell adhesion	9/482	133/21090	0.00353503	0.147094
8	GO:0070665	BP	positive regulation of leukocyte proliferation	8/482	109/21090	0.00356506	0.147094
4	GO:0045577	BP	regulation of B cell differentiation	4/482	28/21090	0.00357042	0.147094
3	GO:0007099	BP	centriole replication	3/482	14/21090	0.00357887	0.147094
3	GO:0002827	BP	positive regulation of T-helper 1 type immune response	3/482	14/21090	0.00357887	0.147094
3	GO:1902932	BP	positive regulation of alcohol biosynthetic process	3/482	14/21090	0.00357887	0.147094
17	GO:0045860	BP	positive regulation of protein kinase activity	17/482	355/21090	0.00376833	0.153682
8	GO:0045580	BP	regulation of T cell differentiation	8/482	110/21090	0.00376987	0.153682
10	GO:0051480	BP	regulation of cytosolic calcium ion concentration	10/482	160/21090	0.0038286	0.155443
24	GO:0043408	BP	regulation of MAPK cascade	24/482	566/21090	0.00384167	0.155658
5	GO:1990266	BP	neutrophil migration	5/482	46/21090	0.00387054	0.156511
21	GO:0055080	BP	cation homeostasis	21/482	464/21090	0.00389921	0.157352
8	GO:0050954	BP	sensory perception of mechanical stimulus	8/482	111/21090	0.00398366	0.160114
7	GO:0000187	BP	activation of MAPK activity	7/482	88/21090	0.00402941	0.161629
4	GO:0050706	BP	regulation of interleukin-1 beta secretion	4/482	29/21090	0.00406796	0.162523
49	GO:0030154	BP	cell differentiation	49/482	1421/21090	0.004169	0.165898
30	GO:0001934	BP	positive regulation of protein phosphorylation	30/482	766/21090	0.00425002	0.168179
5	GO:0032651	BP	regulation of interleukin-1 beta production	5/482	47/21090	0.00425152	0.168179
5	GO:0030101	BP	natural killer cell activation	5/482	47/21090	0.00425152	0.168179
3	GO:0034104	BP	negative regulation of tissue remodeling	3/482	15/21090	0.00439833	0.172961
3	GO:0072520	BP	seminiferous tubule development	3/482	15/21090	0.00439833	0.172961
21	GO:0098771	BP	inorganic ion homeostasis	21/482	476/21090	0.00445629	0.174896
6	GO:0062207	BP	regulation of pattern recognition receptor signaling pathway	6/482	68/21090	0.00457261	0.17911
21	GO:0008283	BP	cell population proliferation	21/482	479/21090	0.00464098	0.18108
5	GO:0002460	BP	adaptive immune response based on somatic recombination of immune receptors built from immunoglobulin superfamily domains	5/482	48/21090	0.00465851	0.18141
9	GO:0043123	BP	positive regulation of I-kappaB kinase/NF-kappaB signaling	9/482	139/21090	0.00472564	0.183667
47	GO:0045595	BP	regulation of cell differentiation	47/482	1366/21090	0.0048382	0.184911
7	GO:0051282	BP	regulation of sequestering of calcium ion	7/482	91/21090	0.00484742	0.184911
2	GO:0090131	BP	mesenchyme migration	2/482	5/21090	0.00497938	0.184911
2	GO:0002925	BP	positive regulation of humoral immune response mediated by circulating immunoglobulin	2/482	5/21090	0.00497938	0.184911
2	GO:0051140	BP	regulation of NK T cell proliferation	2/482	5/21090	0.00497938	0.184911
2	GO:0035547	BP	regulation of interferon-beta secretion	2/482	5/21090	0.00497938	0.184911
2	GO:0035549	BP	positive regulation of interferon-beta secretion	2/482	5/21090	0.00497938	0.184911
2	GO:0031622	BP	positive regulation of fever generation	2/482	5/21090	0.00497938	0.184911
2	GO:0031620	BP	regulation of fever generation	2/482	5/21090	0.00497938	0.184911
2	GO:0030240	BP	skeletal muscle thin filament assembly	2/482	5/21090	0.00497938	0.184911
2	GO:2000343	BP	positive regulation of chemokine (C-X-C motif) ligand 2 production	2/482	5/21090	0.00497938	0.184911
2	GO:1901299	BP	negative regulation of hydrogen peroxide-mediated programmed cell death	2/482	5/21090	0.00497938	0.184911
2	GO:0045359	BP	positive regulation of interferon-beta biosynthetic process	2/482	5/21090	0.00497938	0.184911
2	GO:2000553	BP	positive regulation of T-helper 2 cell cytokine production	2/482	5/21090	0.00497938	0.184911
2	GO:0060676	BP	ureteric bud formation	2/482	5/21090	0.00497938	0.184911
2	GO:0051135	BP	positive regulation of NK T cell activation	2/482	5/21090	0.00497938	0.184911
2	GO:0097527	BP	necroptotic signaling pathway	2/482	5/21090	0.00497938	0.184911
2	GO:0002730	BP	regulation of dendritic cell cytokine production	2/482	5/21090	0.00497938	0.184911
23	GO:0050801	BP	ion homeostasis	23/482	543/21090	0.00499125	0.185009
77	GO:0032501	BP	multicellular organismal process	77/482	2467/21090	0.0050251	0.185919
5	GO:0002763	BP	positive regulation of myeloid leukocyte differentiation	5/482	49/21090	0.00509242	0.186999
5	GO:0034121	BP	regulation of toll-like receptor signaling pathway	5/482	49/21090	0.00509242	0.186999
4	GO:1902930	BP	regulation of alcohol biosynthetic process	4/482	31/21090	0.00519925	0.189905
35	GO:0031401	BP	positive regulation of protein modification process	35/482	949/21090	0.00522425	0.190471
6	GO:2000177	BP	regulation of neural precursor cell proliferation	6/482	70/21090	0.00527315	0.191904
43	GO:0043067	BP	regulation of programmed cell death	43/482	1216/21090	0.00531837	0.192645
3	GO:1902176	BP	negative regulation of oxidative stress-induced intrinsic apoptotic signaling pathway	3/482	16/21090	0.00532237	0.192645
27	GO:0030334	BP	regulation of cell migration	27/482	676/21090	0.00543119	0.196229
6	GO:2000106	BP	regulation of leukocyte apoptotic process	6/482	71/21090	0.00565146	0.203453
8	GO:0046425	BP	regulation of receptor signaling pathway via JAK-STAT	8/482	118/21090	0.00575336	0.206749
7	GO:0001959	BP	regulation of cytokine-mediated signaling pathway	7/482	94/21090	0.00578455	0.207126
7	GO:0002698	BP	negative regulation of immune effector process	7/482	94/21090	0.00578455	0.207126
96	GO:0009893	BP	positive regulation of metabolic process	96/482	3225/21090	0.00580416	0.207457
4	GO:1901031	BP	regulation of response to reactive oxygen species	4/482	32/21090	0.00583648	0.208241
14	GO:0072503	BP	cellular divalent inorganic cation homeostasis	14/482	272/21090	0.00592095	0.210131
18	GO:0030003	BP	cellular cation homeostasis	18/482	402/21090	0.00632809	0.220827
10	GO:0002768	BP	immune response-regulating cell surface receptor signaling pathway	10/482	172/21090	0.00633633	0.220827
3	GO:0045076	BP	regulation of interleukin-2 biosynthetic process	3/482	17/21090	0.00635442	0.220827
3	GO:0002902	BP	regulation of B cell apoptotic process	3/482	17/21090	0.00635442	0.220827
3	GO:0071359	BP	cellular response to dsRNA	3/482	17/21090	0.00635442	0.220827
3	GO:0072678	BP	T cell migration	3/482	17/21090	0.00635442	0.220827
3	GO:0001914	BP	regulation of T cell mediated cytotoxicity	3/482	17/21090	0.00635442	0.220827
3	GO:0060330	BP	regulation of response to interferon-gamma	3/482	17/21090	0.00635442	0.220827
3	GO:0060334	BP	regulation of interferon-gamma-mediated signaling pathway	3/482	17/21090	0.00635442	0.220827
3	GO:0002753	BP	cytoplasmic pattern recognition receptor signaling pathway	3/482	17/21090	0.00635442	0.220827
8	GO:0042113	BP	B cell activation	8/482	120/21090	0.00635473	0.220827
263	GO:0050794	BP	regulation of cellular process	263/482	10198/21090	0.00647139	0.223945
11	GO:0071496	BP	cellular response to external stimulus	11/482	200/21090	0.00647804	0.223945
4	GO:0001961	BP	positive regulation of cytokine-mediated signaling pathway	4/482	33/21090	0.00652368	0.224361
4	GO:0048662	BP	negative regulation of smooth muscle cell proliferation	4/482	33/21090	0.00652368	0.224361
4	GO:0032963	BP	collagen metabolic process	4/482	33/21090	0.00652368	0.224361
5	GO:0002637	BP	regulation of immunoglobulin production	5/482	52/21090	0.00656497	0.225161
18	GO:0051259	BP	protein complex oligomerization	18/482	404/21090	0.00656944	0.225161
8	GO:1904892	BP	regulation of receptor signaling pathway via STAT	8/482	121/21090	0.00667272	0.22831
42	GO:0042981	BP	regulation of apoptotic process	42/482	1196/21090	0.0067684	0.231188
24	GO:0090087	BP	regulation of peptide transport	24/482	585/21090	0.00682868	0.23285
9	GO:0051048	BP	negative regulation of secretion	9/482	148/21090	0.00707014	0.239858
2	GO:2001015	BP	negative regulation of skeletal muscle cell differentiation	2/482	6/21090	0.00735638	0.241782
2	GO:0071639	BP	positive regulation of monocyte chemotactic protein-1 production	2/482	6/21090	0.00735638	0.241782
2	GO:0045917	BP	positive regulation of complement activation	2/482	6/21090	0.00735638	0.241782
2	GO:0002885	BP	positive regulation of hypersensitivity	2/482	6/21090	0.00735638	0.241782
2	GO:1904424	BP	regulation of GTP binding	2/482	6/21090	0.00735638	0.241782
2	GO:0033625	BP	positive regulation of integrin activation	2/482	6/21090	0.00735638	0.241782
2	GO:0060331	BP	negative regulation of response to interferon-gamma	2/482	6/21090	0.00735638	0.241782
2	GO:0060336	BP	negative regulation of interferon-gamma-mediated signaling pathway	2/482	6/21090	0.00735638	0.241782
2	GO:0032819	BP	positive regulation of natural killer cell proliferation	2/482	6/21090	0.00735638	0.241782
2	GO:0051133	BP	regulation of NK T cell activation	2/482	6/21090	0.00735638	0.241782
2	GO:0031652	BP	positive regulation of heat generation	2/482	6/21090	0.00735638	0.241782
2	GO:1902857	BP	positive regulation of non-motile cilium assembly	2/482	6/21090	0.00735638	0.241782
2	GO:0072540	BP	T-helper 17 cell lineage commitment	2/482	6/21090	0.00735638	0.241782
2	GO:0045630	BP	positive regulation of T-helper 2 cell differentiation	2/482	6/21090	0.00735638	0.241782
10	GO:0002764	BP	immune response-regulating signaling pathway	10/482	176/21090	0.00740823	0.242048
3	GO:0098534	BP	centriole assembly	3/482	18/21090	0.00749748	0.242048
3	GO:0045954	BP	positive regulation of natural killer cell mediated cytotoxicity	3/482	18/21090	0.00749748	0.242048
3	GO:1901032	BP	negative regulation of response to reactive oxygen species	3/482	18/21090	0.00749748	0.242048
3	GO:1903206	BP	negative regulation of hydrogen peroxide-induced cell death	3/482	18/21090	0.00749748	0.242048
3	GO:0035584	BP	calcium-mediated signaling using intracellular calcium source	3/482	18/21090	0.00749748	0.242048
3	GO:0032816	BP	positive regulation of natural killer cell activation	3/482	18/21090	0.00749748	0.242048
3	GO:1901532	BP	regulation of hematopoietic progenitor cell differentiation	3/482	18/21090	0.00749748	0.242048
3	GO:0002717	BP	positive regulation of natural killer cell mediated immunity	3/482	18/21090	0.00749748	0.242048
4	GO:1904705	BP	regulation of vascular associated smooth muscle cell proliferation	4/482	35/21090	0.00805429	0.256788
4	GO:0050850	BP	positive regulation of calcium-mediated signaling	4/482	35/21090	0.00805429	0.256788
4	GO:0002820	BP	negative regulation of adaptive immune response	4/482	35/21090	0.00805429	0.256788
4	GO:0030890	BP	positive regulation of B cell proliferation	4/482	35/21090	0.00805429	0.256788
7	GO:0050728	BP	negative regulation of inflammatory response	7/482	100/21090	0.00805671	0.256788
17	GO:0008219	BP	cell death	17/482	379/21090	0.00812655	0.258602
65	GO:0048869	BP	cellular developmental process	65/482	2066/21090	0.00820722	0.260755
5	GO:0001776	BP	leukocyte homeostasis	5/482	55/21090	0.00831262	0.263268
5	GO:0043542	BP	endothelial cell migration	5/482	55/21090	0.00831262	0.263268
6	GO:0042102	BP	positive regulation of T cell proliferation	6/482	77/21090	0.00834915	0.264007
14	GO:0072507	BP	divalent inorganic cation homeostasis	14/482	291/21090	0.00853305	0.269397
3	GO:1904407	BP	positive regulation of nitric oxide metabolic process	3/482	19/21090	0.00875419	0.275077
3	GO:0045429	BP	positive regulation of nitric oxide biosynthetic process	3/482	19/21090	0.00875419	0.275077
6	GO:0002274	BP	myeloid leukocyte activation	6/482	78/21090	0.00887523	0.278443
5	GO:0048015	BP	phosphatidylinositol-mediated signaling	5/482	56/21090	0.00896037	0.280674
23	GO:0051223	BP	regulation of protein transport	23/482	562/21090	0.00899069	0.281184
21	GO:0010942	BP	positive regulation of cell death	21/482	503/21090	0.00908285	0.283181
6	GO:0097191	BP	extrinsic apoptotic signaling pathway	6/482	79/21090	0.0094246	0.292924
17	GO:0030335	BP	positive regulation of cell migration	17/482	388/21090	0.00953718	0.295963
5	GO:0042509	BP	regulation of tyrosine phosphorylation of STAT protein	5/482	57/21090	0.00964213	0.298757
4	GO:0002686	BP	negative regulation of leukocyte migration	4/482	37/21090	0.00980314	0.301413
4	GO:2000179	BP	positive regulation of neural precursor cell proliferation	4/482	37/21090	0.00980314	0.301413
4	GO:0030199	BP	collagen fibril organization	4/482	37/21090	0.00980314	0.301413
4	GO:0002639	BP	positive regulation of immunoglobulin production	4/482	37/21090	0.00980314	0.301413
27	GO:2000145	BP	regulation of cell motility	27/482	711/21090	0.0100567	0.302592
3	GO:1904707	BP	positive regulation of vascular associated smooth muscle cell proliferation	3/482	20/21090	0.0101268	0.302592
3	GO:0032753	BP	positive regulation of interleukin-4 production	3/482	20/21090	0.0101268	0.302592
3	GO:0001895	BP	retina homeostasis	3/482	20/21090	0.0101268	0.302592
2	GO:0018377	BP	protein myristoylation	2/482	7/21090	0.0101438	0.302592
2	GO:0071638	BP	negative regulation of monocyte chemotactic protein-1 production	2/482	7/21090	0.0101438	0.302592
2	GO:0032306	BP	regulation of prostaglandin secretion	2/482	7/21090	0.0101438	0.302592
2	GO:0032308	BP	positive regulation of prostaglandin secretion	2/482	7/21090	0.0101438	0.302592
2	GO:0002883	BP	regulation of hypersensitivity	2/482	7/21090	0.0101438	0.302592
2	GO:0002866	BP	positive regulation of acute inflammatory response to antigenic stimulus	2/482	7/21090	0.0101438	0.302592
2	GO:0060558	BP	regulation of calcidiol 1-monooxygenase activity	2/482	7/21090	0.0101438	0.302592
2	GO:0035743	BP	CD4-positive, alpha-beta T cell cytokine production	2/482	7/21090	0.0101438	0.302592
2	GO:0045416	BP	positive regulation of interleukin-8 biosynthetic process	2/482	7/21090	0.0101438	0.302592
2	GO:0060333	BP	interferon-gamma-mediated signaling pathway	2/482	7/21090	0.0101438	0.302592
2	GO:0032817	BP	regulation of natural killer cell proliferation	2/482	7/21090	0.0101438	0.302592
2	GO:0002676	BP	regulation of chronic inflammatory response	2/482	7/21090	0.0101438	0.302592
2	GO:0031650	BP	regulation of heat generation	2/482	7/21090	0.0101438	0.302592
2	GO:0060638	BP	mesenchymal-epithelial cell signaling	2/482	7/21090	0.0101438	0.302592
2	GO:0014808	BP	release of sequestered calcium ion into cytosol by sarcoplasmic reticulum	2/482	7/21090	0.0101438	0.302592
45	GO:0051247	BP	positive regulation of protein metabolic process	45/482	1341/21090	0.0103836	0.308823
16	GO:0006875	BP	cellular metal ion homeostasis	16/482	356/21090	0.0105553	0.31326
13	GO:0051260	BP	protein homooligomerization	13/482	266/21090	0.0105713	0.31326
6	GO:0051897	BP	positive regulation of protein kinase B signaling	6/482	81/21090	0.0105954	0.31326
6	GO:2001237	BP	negative regulation of extrinsic apoptotic signaling pathway	6/482	81/21090	0.0105954	0.31326
4	GO:0030593	BP	neutrophil chemotaxis	4/482	38/21090	0.0107629	0.317473
23	GO:0019725	BP	cellular homeostasis	23/482	583/21090	0.0107696	0.317473
30	GO:0042327	BP	positive regulation of phosphorylation	30/482	809/21090	0.0109808	0.321334
18	GO:0006873	BP	cellular ion homeostasis	18/482	414/21090	0.0110541	0.323006
5	GO:0048017	BP	inositol lipid-mediated signaling	5/482	59/21090	0.0111109	0.324193
30	GO:0032880	BP	regulation of protein localization	30/482	818/21090	0.0115223	0.334731
3	GO:0002456	BP	T cell mediated immunity	3/482	21/21090	0.0116173	0.335084
3	GO:0001909	BP	leukocyte mediated cytotoxicity	3/482	21/21090	0.0116173	0.335084
3	GO:0010575	BP	positive regulation of vascular endothelial growth factor production	3/482	21/21090	0.0116173	0.335084
20	GO:0043065	BP	positive regulation of apoptotic process	20/482	478/21090	0.0118062	0.340019
6	GO:0002230	BP	positive regulation of defense response to virus by host	6/482	83/21090	0.0118657	0.341241
8	GO:1903531	BP	negative regulation of secretion by cell	8/482	134/21090	0.0119886	0.34428
20	GO:0043068	BP	positive regulation of programmed cell death	20/482	484/21090	0.0123579	0.353871
8	GO:1904950	BP	negative regulation of establishment of protein localization	8/482	135/21090	0.0124979	0.355845
4	GO:0051353	BP	positive regulation of oxidoreductase activity	4/482	40/21090	0.0128594	0.365097
3	GO:0033363	BP	secretory granule organization	3/482	22/21090	0.0132272	0.366277
3	GO:2001034	BP	positive regulation of double-strand break repair via nonhomologous end joining	3/482	22/21090	0.0132272	0.366277
3	GO:0033198	BP	response to ATP	3/482	22/21090	0.0132272	0.366277
3	GO:0045672	BP	positive regulation of osteoclast differentiation	3/482	22/21090	0.0132272	0.366277
2	GO:0090130	BP	tissue migration	2/482	8/21090	0.0133218	0.366277
2	GO:1903514	BP	release of sequestered calcium ion into cytosol by endoplasmic reticulum	2/482	8/21090	0.0133218	0.366277
2	GO:0032305	BP	positive regulation of icosanoid secretion	2/482	8/21090	0.0133218	0.366277
2	GO:0002645	BP	positive regulation of tolerance induction	2/482	8/21090	0.0133218	0.366277
2	GO:0002862	BP	negative regulation of inflammatory response to antigenic stimulus	2/482	8/21090	0.0133218	0.366277
2	GO:0043374	BP	CD8-positive, alpha-beta T cell differentiation	2/482	8/21090	0.0133218	0.366277
2	GO:0033689	BP	negative regulation of osteoblast proliferation	2/482	8/21090	0.0133218	0.366277
2	GO:0060252	BP	positive regulation of glial cell proliferation	2/482	8/21090	0.0133218	0.366277
2	GO:2000341	BP	regulation of chemokine (C-X-C motif) ligand 2 production	2/482	8/21090	0.0133218	0.366277
2	GO:0010919	BP	regulation of inositol phosphate biosynthetic process	2/482	8/21090	0.0133218	0.366277
2	GO:0002327	BP	immature B cell differentiation	2/482	8/21090	0.0133218	0.366277
2	GO:1901298	BP	regulation of hydrogen peroxide-mediated programmed cell death	2/482	8/21090	0.0133218	0.366277
2	GO:0035234	BP	ectopic germ cell programmed cell death	2/482	8/21090	0.0133218	0.366277
2	GO:0010818	BP	T cell chemotaxis	2/482	8/21090	0.0133218	0.366277
2	GO:0072172	BP	mesonephric tubule formation	2/482	8/21090	0.0133218	0.366277
2	GO:0006957	BP	complement activation, alternative pathway	2/482	8/21090	0.0133218	0.366277
31	GO:0045937	BP	positive regulation of phosphate metabolic process	31/482	856/21090	0.0133925	0.367213
31	GO:0010562	BP	positive regulation of phosphorus metabolic process	31/482	856/21090	0.0133925	0.367213
13	GO:0019221	BP	cytokine-mediated signaling pathway	13/482	279/21090	0.0138606	0.379008
4	GO:0032370	BP	positive regulation of lipid transport	4/482	41/21090	0.0139985	0.381736
22	GO:0030001	BP	metal ion transport	22/482	562/21090	0.0140962	0.383876
8	GO:2001236	BP	regulation of extrinsic apoptotic signaling pathway	8/482	138/21090	0.0141214	0.38404
12	GO:0006874	BP	cellular calcium ion homeostasis	12/482	245/21090	0.0144061	0.391251
20	GO:0043269	BP	regulation of ion transport	20/482	501/21090	0.0147845	0.400985
3	GO:0043372	BP	positive regulation of CD4-positive, alpha-beta T cell differentiation	3/482	23/21090	0.0149579	0.402956
3	GO:1902175	BP	regulation of oxidative stress-induced intrinsic apoptotic signaling pathway	3/482	23/21090	0.0149579	0.402956
3	GO:1903205	BP	regulation of hydrogen peroxide-induced cell death	3/482	23/21090	0.0149579	0.402956
3	GO:0086002	BP	cardiac muscle cell action potential involved in contraction	3/482	23/21090	0.0149579	0.402956
3	GO:0032660	BP	regulation of interleukin-17 production	3/482	23/21090	0.0149579	0.402956
17	GO:0043410	BP	positive regulation of MAPK cascade	17/482	394/21090	0.0151307	0.407066
8	GO:0042493	BP	response to drug	8/482	140/21090	0.0152857	0.410132
10	GO:2001234	BP	negative regulation of apoptotic signaling pathway	10/482	197/21090	0.0154959	0.414863
17	GO:0033674	BP	positive regulation of kinase activity	17/482	398/21090	0.0156668	0.418673
27	GO:0045597	BP	positive regulation of cell differentiation	27/482	731/21090	0.0157031	0.419086
7	GO:1905330	BP	regulation of morphogenesis of an epithelium	7/482	114/21090	0.0158224	0.421145
7	GO:0009266	BP	response to temperature stimulus	7/482	114/21090	0.0158224	0.421145
6	GO:0050709	BP	negative regulation of protein secretion	6/482	89/21090	0.0163141	0.43128
23	GO:0007155	BP	cell adhesion	23/482	592/21090	0.0163693	0.43128
4	GO:0050766	BP	positive regulation of phagocytosis	4/482	43/21090	0.0164638	0.43128
17	GO:0055065	BP	metal ion homeostasis	17/482	403/21090	0.0164773	0.43128
17	GO:2000147	BP	positive regulation of cell motility	17/482	403/21090	0.0164773	0.43128
9	GO:0043270	BP	positive regulation of ion transport	9/482	170/21090	0.016483	0.43128
3	GO:0002292	BP	T cell differentiation involved in immune response	3/482	24/21090	0.0168102	0.43128
3	GO:0042269	BP	regulation of natural killer cell mediated cytotoxicity	3/482	24/21090	0.0168102	0.43128
3	GO:0001659	BP	temperature homeostasis	3/482	24/21090	0.0168102	0.43128
3	GO:0045662	BP	negative regulation of myoblast differentiation	3/482	24/21090	0.0168102	0.43128
3	GO:0098586	BP	cellular response to virus	3/482	24/21090	0.0168102	0.43128
23	GO:0022610	BP	biological adhesion	23/482	597/21090	0.016831	0.43128
2	GO:0002295	BP	T-helper cell lineage commitment	2/482	9/21090	0.0168711	0.43128
2	GO:0002923	BP	regulation of humoral immune response mediated by circulating immunoglobulin	2/482	9/21090	0.0168711	0.43128
2	GO:0032303	BP	regulation of icosanoid secretion	2/482	9/21090	0.0168711	0.43128
2	GO:0002532	BP	production of molecular mediator involved in inflammatory response	2/482	9/21090	0.0168711	0.43128
2	GO:0002864	BP	regulation of acute inflammatory response to antigenic stimulus	2/482	9/21090	0.0168711	0.43128
2	GO:0043373	BP	CD4-positive, alpha-beta T cell lineage commitment	2/482	9/21090	0.0168711	0.43128
2	GO:0060556	BP	regulation of vitamin D biosynthetic process	2/482	9/21090	0.0168711	0.43128
2	GO:0003139	BP	secondary heart field specification	2/482	9/21090	0.0168711	0.43128
2	GO:0032609	BP	interferon-gamma production	2/482	9/21090	0.0168711	0.43128
2	GO:0035457	BP	cellular response to interferon-alpha	2/482	9/21090	0.0168711	0.43128
2	GO:0061900	BP	glial cell activation	2/482	9/21090	0.0168711	0.43128
2	GO:0003128	BP	heart field specification	2/482	9/21090	0.0168711	0.43128
2	GO:1902855	BP	regulation of non-motile cilium assembly	2/482	9/21090	0.0168711	0.43128
2	GO:1905456	BP	regulation of lymphoid progenitor cell differentiation	2/482	9/21090	0.0168711	0.43128
27	GO:0040012	BP	regulation of locomotion	27/482	742/21090	0.0169105	0.43143
19	GO:0055082	BP	cellular chemical homeostasis	19/482	466/21090	0.0169201	0.43143
61	GO:0010628	BP	positive regulation of gene expression	61/482	1981/21090	0.0174623	0.443017
4	GO:0071621	BP	granulocyte chemotaxis	4/482	44/21090	0.0177919	0.449808
9	GO:0043406	BP	positive regulation of MAP kinase activity	9/482	173/21090	0.0182596	0.449808
47	GO:0031399	BP	regulation of protein modification process	47/482	1468/21090	0.0183592	0.449808
5	GO:0050830	BP	defense response to Gram-positive bacterium	5/482	67/21090	0.0185003	0.449808
5	GO:0045582	BP	positive regulation of T cell differentiation	5/482	67/21090	0.0185003	0.449808
12	GO:0055074	BP	calcium ion homeostasis	12/482	258/21090	0.0185222	0.449808
3	GO:1902042	BP	negative regulation of extrinsic apoptotic signaling pathway via death domain receptors	3/482	25/21090	0.018785	0.449808
3	GO:0048741	BP	skeletal muscle fiber development	3/482	25/21090	0.018785	0.449808
3	GO:0019835	BP	cytolysis	3/482	25/21090	0.018785	0.449808
3	GO:0043367	BP	CD4-positive, alpha-beta T cell differentiation	3/482	25/21090	0.018785	0.449808
3	GO:0002715	BP	regulation of natural killer cell mediated immunity	3/482	25/21090	0.018785	0.449808
6	GO:0006022	BP	aminoglycan metabolic process	6/482	92/21090	0.0189206	0.449808
4	GO:0001960	BP	negative regulation of cytokine-mediated signaling pathway	4/482	45/21090	0.0191848	0.449808
12	GO:0010959	BP	regulation of metal ion transport	12/482	260/21090	0.0193085	0.449808
17	GO:0051272	BP	positive regulation of cellular component movement	17/482	416/21090	0.0193386	0.449808
17	GO:0040017	BP	positive regulation of locomotion	17/482	417/21090	0.0196052	0.449808
4	GO:0046324	BP	regulation of glucose import	4/482	46/21090	0.0206433	0.449808
4	GO:2000514	BP	regulation of CD4-positive, alpha-beta T cell activation	4/482	46/21090	0.0206433	0.449808
17	GO:1902532	BP	negative regulation of intracellular signal transduction	17/482	421/21090	0.02074	0.449808
2	GO:0086013	BP	membrane repolarization during cardiac muscle cell action potential	2/482	10/21090	0.0207732	0.449808
2	GO:0086011	BP	membrane repolarization during action potential	2/482	10/21090	0.0207732	0.449808
2	GO:0070296	BP	sarcoplasmic reticulum calcium ion transport	2/482	10/21090	0.0207732	0.449808
2	GO:0010715	BP	regulation of extracellular matrix disassembly	2/482	10/21090	0.0207732	0.449808
2	GO:0048304	BP	positive regulation of isotype switching to IgG isotypes	2/482	10/21090	0.0207732	0.449808
2	GO:1904469	BP	positive regulation of tumor necrosis factor secretion	2/482	10/21090	0.0207732	0.449808
2	GO:0001675	BP	acrosome assembly	2/482	10/21090	0.0207732	0.449808
2	GO:0035563	BP	positive regulation of chromatin binding	2/482	10/21090	0.0207732	0.449808
2	GO:1903054	BP	negative regulation of extracellular matrix organization	2/482	10/21090	0.0207732	0.449808
2	GO:0032754	BP	positive regulation of interleukin-5 production	2/482	10/21090	0.0207732	0.449808
2	GO:2000193	BP	positive regulation of fatty acid transport	2/482	10/21090	0.0207732	0.449808
2	GO:0045414	BP	regulation of interleukin-8 biosynthetic process	2/482	10/21090	0.0207732	0.449808
2	GO:0002407	BP	dendritic cell chemotaxis	2/482	10/21090	0.0207732	0.449808
2	GO:0046851	BP	negative regulation of bone remodeling	2/482	10/21090	0.0207732	0.449808
2	GO:0002369	BP	T cell cytokine production	2/482	10/21090	0.0207732	0.449808
2	GO:0033194	BP	response to hydroperoxide	2/482	10/21090	0.0207732	0.449808
2	GO:0017121	BP	plasma membrane phospholipid scrambling	2/482	10/21090	0.0207732	0.449808
2	GO:0034620	BP	cellular response to unfolded protein	2/482	10/21090	0.0207732	0.449808
2	GO:0033632	BP	regulation of cell-cell adhesion mediated by integrin	2/482	10/21090	0.0207732	0.449808
6	GO:0034767	BP	positive regulation of ion transmembrane transport	6/482	94/21090	0.0208079	0.449808
6	GO:0002792	BP	negative regulation of peptide secretion	6/482	94/21090	0.0208079	0.449808
3	GO:2001240	BP	negative regulation of extrinsic apoptotic signaling pathway in absence of ligand	3/482	26/21090	0.0208828	0.449808
3	GO:0045830	BP	positive regulation of isotype switching	3/482	26/21090	0.0208828	0.449808
3	GO:1901099	BP	negative regulation of signal transduction in absence of ligand	3/482	26/21090	0.0208828	0.449808
3	GO:0002440	BP	production of molecular mediator of immune response	3/482	26/21090	0.0208828	0.449808
3	GO:0002701	BP	negative regulation of production of molecular mediator of immune response	3/482	26/21090	0.0208828	0.449808
3	GO:2000516	BP	positive regulation of CD4-positive, alpha-beta T cell activation	3/482	26/21090	0.0208828	0.449808
3	GO:0062208	BP	positive regulation of pattern recognition receptor signaling pathway	3/482	26/21090	0.0208828	0.449808
3	GO:0010574	BP	regulation of vascular endothelial growth factor production	3/482	26/21090	0.0208828	0.449808
3	GO:0097028	BP	dendritic cell differentiation	3/482	26/21090	0.0208828	0.449808
12	GO:0006897	BP	endocytosis	12/482	266/21090	0.0219258	0.449808
4	GO:0050810	BP	regulation of steroid biosynthetic process	4/482	47/21090	0.0221681	0.449808
1	GO:1902216	BP	positive regulation of interleukin-4-mediated signaling pathway	1/482	1/21090	0.0228544	0.449808
1	GO:2000334	BP	positive regulation of blood microparticle formation	1/482	1/21090	0.0228544	0.449808
1	GO:2000332	BP	regulation of blood microparticle formation	1/482	1/21090	0.0228544	0.449808
1	GO:0010920	BP	negative regulation of inositol phosphate biosynthetic process	1/482	1/21090	0.0228544	0.449808
1	GO:0010924	BP	regulation of inositol-polyphosphate 5-phosphatase activity	1/482	1/21090	0.0228544	0.449808
1	GO:0010925	BP	positive regulation of inositol-polyphosphate 5-phosphatase activity	1/482	1/21090	0.0228544	0.449808
1	GO:0090425	BP	acinar cell differentiation	1/482	1/21090	0.0228544	0.449808
1	GO:0072679	BP	thymocyte migration	1/482	1/21090	0.0228544	0.449808
1	GO:0034158	BP	toll-like receptor 8 signaling pathway	1/482	1/21090	0.0228544	0.449808
1	GO:0046619	BP	optic placode formation involved in camera-type eye formation	1/482	1/21090	0.0228544	0.449808
1	GO:0007497	BP	posterior midgut development	1/482	1/21090	0.0228544	0.449808
1	GO:0045366	BP	regulation of interleukin-13 biosynthetic process	1/482	1/21090	0.0228544	0.449808
1	GO:0045368	BP	positive regulation of interleukin-13 biosynthetic process	1/482	1/21090	0.0228544	0.449808
1	GO:0034119	BP	negative regulation of erythrocyte aggregation	1/482	1/21090	0.0228544	0.449808
1	GO:0034118	BP	regulation of erythrocyte aggregation	1/482	1/21090	0.0228544	0.449808
1	GO:0044546	BP	NLRP3 inflammasome complex assembly	1/482	1/21090	0.0228544	0.449808
1	GO:2000979	BP	positive regulation of forebrain neuron differentiation	1/482	1/21090	0.0228544	0.449808
1	GO:0046014	BP	negative regulation of T cell homeostatic proliferation	1/482	1/21090	0.0228544	0.449808
1	GO:1903904	BP	negative regulation of establishment of T cell polarity	1/482	1/21090	0.0228544	0.449808
1	GO:0061114	BP	branching involved in pancreas morphogenesis	1/482	1/21090	0.0228544	0.449808
1	GO:0044855	BP	plasma membrane raft distribution	1/482	1/21090	0.0228544	0.449808
1	GO:0044856	BP	plasma membrane raft localization	1/482	1/21090	0.0228544	0.449808
1	GO:0007284	BP	spermatogonial cell division	1/482	1/21090	0.0228544	0.449808
1	GO:0070447	BP	positive regulation of oligodendrocyte progenitor proliferation	1/482	1/21090	0.0228544	0.449808
1	GO:1904205	BP	negative regulation of skeletal muscle hypertrophy	1/482	1/21090	0.0228544	0.449808
1	GO:1905834	BP	response to pyrimidine ribonucleotide	1/482	1/21090	0.0228544	0.449808
1	GO:1905835	BP	cellular response to pyrimidine ribonucleotide	1/482	1/21090	0.0228544	0.449808
1	GO:0036058	BP	filtration diaphragm assembly	1/482	1/21090	0.0228544	0.449808
1	GO:0034346	BP	positive regulation of type III interferon production	1/482	1/21090	0.0228544	0.449808
1	GO:1904999	BP	positive regulation of leukocyte adhesion to arterial endothelial cell	1/482	1/21090	0.0228544	0.449808
1	GO:1903087	BP	mitotic spindle pole body duplication	1/482	1/21090	0.0228544	0.449808
1	GO:1905872	BP	negative regulation of protein localization to cell leading edge	1/482	1/21090	0.0228544	0.449808
1	GO:1905871	BP	regulation of protein localization to cell leading edge	1/482	1/21090	0.0228544	0.449808
1	GO:0033606	BP	chemokine receptor transport within lipid bilayer	1/482	1/21090	0.0228544	0.449808
1	GO:0001788	BP	antibody-dependent cellular cytotoxicity	1/482	1/21090	0.0228544	0.449808
1	GO:0035505	BP	positive regulation of myosin light chain kinase activity	1/482	1/21090	0.0228544	0.449808
1	GO:0035504	BP	regulation of myosin light chain kinase activity	1/482	1/21090	0.0228544	0.449808
1	GO:0060003	BP	copper ion export	1/482	1/21090	0.0228544	0.449808
1	GO:0006447	BP	regulation of translational initiation by iron	1/482	1/21090	0.0228544	0.449808
1	GO:0002194	BP	hepatocyte cell migration	1/482	1/21090	0.0228544	0.449808
1	GO:2001107	BP	negative regulation of Rho guanyl-nucleotide exchange factor activity	1/482	1/21090	0.0228544	0.449808
1	GO:0034344	BP	regulation of type III interferon production	1/482	1/21090	0.0228544	0.449808
1	GO:0070953	BP	regulation of neutrophil mediated killing of fungus	1/482	1/21090	0.0228544	0.449808
1	GO:0002246	BP	wound healing involved in inflammatory response	1/482	1/21090	0.0228544	0.449808
1	GO:1905404	BP	positive regulation of activated CD8-positive, alpha-beta T cell apoptotic process	1/482	1/21090	0.0228544	0.449808
1	GO:0009609	BP	response to symbiotic bacterium	1/482	1/21090	0.0228544	0.449808
1	GO:0009608	BP	response to symbiont	1/482	1/21090	0.0228544	0.449808
1	GO:1900150	BP	regulation of defense response to fungus	1/482	1/21090	0.0228544	0.449808
1	GO:0000706	BP	meiotic DNA double-strand break processing	1/482	1/21090	0.0228544	0.449808
1	GO:0002468	BP	dendritic cell antigen processing and presentation	1/482	1/21090	0.0228544	0.449808
1	GO:0016332	BP	establishment or maintenance of polarity of embryonic epithelium	1/482	1/21090	0.0228544	0.449808
1	GO:0002721	BP	regulation of B cell cytokine production	1/482	1/21090	0.0228544	0.449808
1	GO:2000174	BP	regulation of pro-T cell differentiation	1/482	1/21090	0.0228544	0.449808
1	GO:2000176	BP	positive regulation of pro-T cell differentiation	1/482	1/21090	0.0228544	0.449808
1	GO:0032600	BP	chemokine receptor transport out of membrane raft	1/482	1/21090	0.0228544	0.449808
1	GO:1902204	BP	positive regulation of hepatocyte growth factor receptor signaling pathway	1/482	1/21090	0.0228544	0.449808
1	GO:2000346	BP	negative regulation of hepatocyte proliferation	1/482	1/21090	0.0228544	0.449808
1	GO:0002445	BP	type II hypersensitivity	1/482	1/21090	0.0228544	0.449808
1	GO:0090291	BP	negative regulation of osteoclast proliferation	1/482	1/21090	0.0228544	0.449808
1	GO:0036145	BP	dendritic cell homeostasis	1/482	1/21090	0.0228544	0.449808
1	GO:0014853	BP	regulation of excitatory postsynaptic membrane potential involved in skeletal muscle contraction	1/482	1/21090	0.0228544	0.449808
1	GO:0032621	BP	interleukin-18 production	1/482	1/21090	0.0228544	0.449808
1	GO:0030845	BP	phospholipase C-inhibiting G protein-coupled receptor signaling pathway	1/482	1/21090	0.0228544	0.449808
1	GO:0045065	BP	cytotoxic T cell differentiation	1/482	1/21090	0.0228544	0.449808
1	GO:0030474	BP	spindle pole body duplication	1/482	1/21090	0.0228544	0.449808
1	GO:0001743	BP	optic placode formation	1/482	1/21090	0.0228544	0.449808
1	GO:1990654	BP	sebum secreting cell proliferation	1/482	1/21090	0.0228544	0.449808
1	GO:0010705	BP	meiotic DNA double-strand break processing involved in reciprocal meiotic recombination	1/482	1/21090	0.0228544	0.449808
1	GO:0051300	BP	spindle pole body organization	1/482	1/21090	0.0228544	0.449808
1	GO:0072061	BP	inner medullary collecting duct development	1/482	1/21090	0.0228544	0.449808
1	GO:0072060	BP	outer medullary collecting duct development	1/482	1/21090	0.0228544	0.449808
1	GO:0060482	BP	lobar bronchus development	1/482	1/21090	0.0228544	0.449808
1	GO:0106016	BP	positive regulation of inflammatory response to wounding	1/482	1/21090	0.0228544	0.449808
1	GO:1905927	BP	regulation of invadopodium disassembly	1/482	1/21090	0.0228544	0.449808
1	GO:1905929	BP	positive regulation of invadopodium disassembly	1/482	1/21090	0.0228544	0.449808
1	GO:2000843	BP	regulation of testosterone secretion	1/482	1/21090	0.0228544	0.449808
1	GO:2000845	BP	positive regulation of testosterone secretion	1/482	1/21090	0.0228544	0.449808
1	GO:0045355	BP	negative regulation of interferon-alpha biosynthetic process	1/482	1/21090	0.0228544	0.449808
1	GO:0045358	BP	negative regulation of interferon-beta biosynthetic process	1/482	1/21090	0.0228544	0.449808
1	GO:0034106	BP	regulation of erythrocyte clearance	1/482	1/21090	0.0228544	0.449808
1	GO:0034107	BP	negative regulation of erythrocyte clearance	1/482	1/21090	0.0228544	0.449808
1	GO:0032685	BP	negative regulation of granulocyte macrophage colony-stimulating factor production	1/482	1/21090	0.0228544	0.449808
1	GO:1904905	BP	negative regulation of endothelial cell-matrix adhesion via fibronectin	1/482	1/21090	0.0228544	0.449808
1	GO:1904904	BP	regulation of endothelial cell-matrix adhesion via fibronectin	1/482	1/21090	0.0228544	0.449808
1	GO:0035645	BP	enteric smooth muscle cell differentiation	1/482	1/21090	0.0228544	0.449808
1	GO:0010878	BP	cholesterol storage	1/482	1/21090	0.0228544	0.449808
1	GO:0043251	BP	sodium-dependent organic anion transport	1/482	1/21090	0.0228544	0.449808
1	GO:0002845	BP	positive regulation of tolerance induction to tumor cell	1/482	1/21090	0.0228544	0.449808
1	GO:0002843	BP	regulation of tolerance induction to tumor cell	1/482	1/21090	0.0228544	0.449808
1	GO:1902362	BP	melanocyte apoptotic process	1/482	1/21090	0.0228544	0.449808
1	GO:0036060	BP	slit diaphragm assembly	1/482	1/21090	0.0228544	0.449808
1	GO:1904476	BP	negative regulation of Ras GTPase binding	1/482	1/21090	0.0228544	0.449808
1	GO:0032599	BP	protein transport out of membrane raft	1/482	1/21090	0.0228544	0.449808
1	GO:0048144	BP	fibroblast proliferation	1/482	1/21090	0.0228544	0.449808
1	GO:0060305	BP	regulation of cell diameter	1/482	1/21090	0.0228544	0.449808
1	GO:0150007	BP	clathrin-dependent synaptic vesicle endocytosis	1/482	1/21090	0.0228544	0.449808
1	GO:0014054	BP	positive regulation of gamma-aminobutyric acid secretion	1/482	1/21090	0.0228544	0.449808
1	GO:0039530	BP	MDA-5 signaling pathway	1/482	1/21090	0.0228544	0.449808
1	GO:1902480	BP	protein localization to mitotic spindle	1/482	1/21090	0.0228544	0.449808
1	GO:0061048	BP	negative regulation of branching involved in lung morphogenesis	1/482	1/21090	0.0228544	0.449808
1	GO:0140039	BP	cell-cell adhesion in response to extracellular stimulus	1/482	1/21090	0.0228544	0.449808
1	GO:0070965	BP	positive regulation of neutrophil mediated killing of fungus	1/482	1/21090	0.0228544	0.449808
1	GO:0001794	BP	type IIa hypersensitivity	1/482	1/21090	0.0228544	0.449808
1	GO:0042103	BP	positive regulation of T cell homeostatic proliferation	1/482	1/21090	0.0228544	0.449808
1	GO:0033037	BP	polysaccharide localization	1/482	1/21090	0.0228544	0.449808
1	GO:1901676	BP	positive regulation of histone H3-K27 acetylation	1/482	1/21090	0.0228544	0.449808
1	GO:0032701	BP	negative regulation of interleukin-18 production	1/482	1/21090	0.0228544	0.449808
1	GO:0034276	BP	kynurenic acid biosynthetic process	1/482	1/21090	0.0228544	0.449808
1	GO:0034275	BP	kynurenic acid metabolic process	1/482	1/21090	0.0228544	0.449808
1	GO:0002439	BP	chronic inflammatory response to antigenic stimulus	1/482	1/21090	0.0228544	0.449808
1	GO:0051597	BP	response to methylmercury	1/482	1/21090	0.0228544	0.449808
1	GO:0043111	BP	replication fork arrest	1/482	1/21090	0.0228544	0.449808
1	GO:0002470	BP	plasmacytoid dendritic cell antigen processing and presentation	1/482	1/21090	0.0228544	0.449808
1	GO:0016340	BP	calcium-dependent cell-matrix adhesion	1/482	1/21090	0.0228544	0.449808
1	GO:0045994	BP	positive regulation of translational initiation by iron	1/482	1/21090	0.0228544	0.449808
1	GO:0014861	BP	regulation of skeletal muscle contraction via regulation of action potential	1/482	1/21090	0.0228544	0.449808
3	GO:0086001	BP	cardiac muscle cell action potential	3/482	27/21090	0.0231036	0.45382
3	GO:1903428	BP	positive regulation of reactive oxygen species biosynthetic process	3/482	27/21090	0.0231036	0.45382
11	GO:0071902	BP	positive regulation of protein serine/threonine kinase activity	11/482	233/21090	0.0231329	0.453949
9	GO:0032872	BP	regulation of stress-activated MAPK cascade	9/482	181/21090	0.0236729	0.463074
4	GO:0060761	BP	negative regulation of response to cytokine stimulus	4/482	48/21090	0.0237599	0.463074
4	GO:0060688	BP	regulation of morphogenesis of a branching structure	4/482	48/21090	0.0237599	0.463074
4	GO:2000401	BP	regulation of lymphocyte migration	4/482	48/21090	0.0237599	0.463074
4	GO:0014015	BP	positive regulation of gliogenesis	4/482	48/21090	0.0237599	0.463074
4	GO:1903556	BP	negative regulation of tumor necrosis factor superfamily cytokine production	4/482	48/21090	0.0237599	0.463074
11	GO:0097190	BP	apoptotic signaling pathway	11/482	235/21090	0.0240113	0.466158
41	GO:0042325	BP	regulation of phosphorylation	41/482	1254/21090	0.0243099	0.471042
38	GO:0001932	BP	regulation of protein phosphorylation	38/482	1144/21090	0.0244269	0.472851
11	GO:0045765	BP	regulation of angiogenesis	11/482	236/21090	0.024471	0.473247
2	GO:0030656	BP	regulation of vitamin metabolic process	2/482	11/21090	0.0250101	0.473799
2	GO:0099622	BP	cardiac muscle cell membrane repolarization	2/482	11/21090	0.0250101	0.473799
2	GO:1903025	BP	regulation of RNA polymerase II regulatory region sequence-specific DNA binding	2/482	11/21090	0.0250101	0.473799
2	GO:0033623	BP	regulation of integrin activation	2/482	11/21090	0.0250101	0.473799
2	GO:0014819	BP	regulation of skeletal muscle contraction	2/482	11/21090	0.0250101	0.473799
2	GO:0045628	BP	regulation of T-helper 2 cell differentiation	2/482	11/21090	0.0250101	0.473799
2	GO:0060259	BP	regulation of feeding behavior	2/482	11/21090	0.0250101	0.473799
2	GO:2001185	BP	regulation of CD8-positive, alpha-beta T cell activation	2/482	11/21090	0.0250101	0.473799
2	GO:1905517	BP	macrophage migration	2/482	11/21090	0.0250101	0.473799
2	GO:1901550	BP	regulation of endothelial cell development	2/482	11/21090	0.0250101	0.473799
2	GO:0034116	BP	positive regulation of heterotypic cell-cell adhesion	2/482	11/21090	0.0250101	0.473799
2	GO:0051023	BP	regulation of immunoglobulin secretion	2/482	11/21090	0.0250101	0.473799
2	GO:1903140	BP	regulation of establishment of endothelial barrier	2/482	11/21090	0.0250101	0.473799
4	GO:0048747	BP	muscle fiber development	4/482	49/21090	0.0254192	0.478272
3	GO:0050853	BP	B cell receptor signaling pathway	3/482	28/21090	0.0254476	0.478272
3	GO:0035710	BP	CD4-positive, alpha-beta T cell activation	3/482	28/21090	0.0254476	0.478272
3	GO:0050918	BP	positive chemotaxis	3/482	28/21090	0.0254476	0.478272
27	GO:0051270	BP	regulation of cellular component movement	27/482	764/21090	0.0254798	0.478427
5	GO:0010631	BP	epithelial cell migration	5/482	73/21090	0.0257797	0.482249
5	GO:0050673	BP	epithelial cell proliferation	5/482	73/21090	0.0257797	0.482249
7	GO:0051896	BP	regulation of protein kinase B signaling	7/482	126/21090	0.025812	0.482402
106	GO:0048523	BP	negative regulation of cellular process	106/482	3811/21090	0.0265933	0.494695
10	GO:0002253	BP	activation of immune response	10/482	201/21090	0.0269622	0.501091
4	GO:0098739	BP	import across plasma membrane	4/482	50/21090	0.0271466	0.503117
4	GO:0045661	BP	regulation of myoblast differentiation	4/482	50/21090	0.0271466	0.503117
4	GO:0009636	BP	response to toxic substance	4/482	50/21090	0.0271466	0.503117
8	GO:0030198	BP	extracellular matrix organization	8/482	156/21090	0.0272166	0.503481
18	GO:0051347	BP	positive regulation of transferase activity	18/482	466/21090	0.027537	0.508469
3	GO:2001032	BP	regulation of double-strand break repair via nonhomologous end joining	3/482	29/21090	0.0279145	0.512133
3	GO:0060306	BP	regulation of membrane repolarization	3/482	29/21090	0.0279145	0.512133
3	GO:0031663	BP	lipopolysaccharide-mediated signaling pathway	3/482	29/21090	0.0279145	0.512133
3	GO:0060976	BP	coronary vasculature development	3/482	29/21090	0.0279145	0.512133
3	GO:0045332	BP	phospholipid translocation	3/482	29/21090	0.0279145	0.512133
3	GO:0019915	BP	lipid storage	3/482	29/21090	0.0279145	0.512133
10	GO:0051091	BP	positive regulation of DNA-binding transcription factor activity	10/482	204/21090	0.028026	0.513237
8	GO:0043062	BP	extracellular structure organization	8/482	157/21090	0.0281293	0.514189
4	GO:0070098	BP	chemokine-mediated signaling pathway	4/482	51/21090	0.0289425	0.528088
8	GO:0050920	BP	regulation of chemotaxis	8/482	158/21090	0.0290631	0.529323
2	GO:0072079	BP	nephron tubule formation	2/482	12/21090	0.0295645	0.530254
2	GO:0042267	BP	natural killer cell mediated cytotoxicity	2/482	12/21090	0.0295645	0.530254
2	GO:0010893	BP	positive regulation of steroid biosynthetic process	2/482	12/21090	0.0295645	0.530254
2	GO:0060340	BP	positive regulation of type I interferon-mediated signaling pathway	2/482	12/21090	0.0295645	0.530254
2	GO:0002228	BP	natural killer cell mediated immunity	2/482	12/21090	0.0295645	0.530254
2	GO:2000052	BP	positive regulation of non-canonical Wnt signaling pathway	2/482	12/21090	0.0295645	0.530254
2	GO:2000402	BP	negative regulation of lymphocyte migration	2/482	12/21090	0.0295645	0.530254
2	GO:0070266	BP	necroptotic process	2/482	12/21090	0.0295645	0.530254
2	GO:0060251	BP	regulation of glial cell proliferation	2/482	12/21090	0.0295645	0.530254
2	GO:0042089	BP	cytokine biosynthetic process	2/482	12/21090	0.0295645	0.530254
2	GO:0010092	BP	specification of animal organ identity	2/482	12/21090	0.0295645	0.530254
2	GO:0002363	BP	alpha-beta T cell lineage commitment	2/482	12/21090	0.0295645	0.530254
2	GO:1900017	BP	positive regulation of cytokine production involved in inflammatory response	2/482	12/21090	0.0295645	0.530254
2	GO:0043369	BP	CD4-positive or CD8-positive, alpha-beta T cell lineage commitment	2/482	12/21090	0.0295645	0.530254
6	GO:0035108	BP	limb morphogenesis	6/482	102/21090	0.0296236	0.530364
6	GO:0035107	BP	appendage morphogenesis	6/482	102/21090	0.0296236	0.530364
8	GO:0006898	BP	receptor-mediated endocytosis	8/482	159/21090	0.030018	0.536008
5	GO:0030203	BP	glycosaminoglycan metabolic process	5/482	76/21090	0.0300192	0.536008
5	GO:0009408	BP	response to heat	5/482	76/21090	0.0300192	0.536008
3	GO:0034204	BP	lipid translocation	3/482	30/21090	0.0305039	0.542243
3	GO:0046326	BP	positive regulation of glucose import	3/482	30/21090	0.0305039	0.542243
3	GO:0014904	BP	myotube cell development	3/482	30/21090	0.0305039	0.542243
28	GO:1901700	BP	response to oxygen-containing compound	28/482	814/21090	0.0306398	0.544177
67	GO:0051246	BP	regulation of protein metabolic process	67/482	2275/21090	0.0309044	0.548388
7	GO:0051224	BP	negative regulation of protein transport	7/482	131/21090	0.0310201	0.549467
7	GO:0043409	BP	negative regulation of MAPK cascade	7/482	131/21090	0.0310201	0.549467
13	GO:1901699	BP	cellular response to nitrogen compound	13/482	306/21090	0.0310476	0.549469
15	GO:0034765	BP	regulation of ion transmembrane transport	15/482	368/21090	0.0318113	0.562487
8	GO:0051924	BP	regulation of calcium ion transport	8/482	161/21090	0.031992	0.565183
4	GO:0002224	BP	toll-like receptor signaling pathway	4/482	53/21090	0.0327413	0.577909
5	GO:0120034	BP	positive regulation of plasma membrane bounded cell projection assembly	5/482	78/21090	0.0330754	0.583187
3	GO:0030316	BP	osteoclast differentiation	3/482	31/21090	0.0332151	0.583187
3	GO:0006024	BP	glycosaminoglycan biosynthetic process	3/482	31/21090	0.0332151	0.583187
84	GO:0010604	BP	positive regulation of macromolecule metabolic process	84/482	2951/21090	0.0332595	0.583431
7	GO:0001667	BP	ameboidal-type cell migration	7/482	133/21090	0.0332873	0.583431
38	GO:0055085	BP	transmembrane transport	38/482	1173/21090	0.0338438	0.592388
19	GO:0098662	BP	inorganic cation transmembrane transport	19/482	509/21090	0.034408	0.592388
2	GO:0001779	BP	natural killer cell differentiation	2/482	13/21090	0.0344198	0.592388
2	GO:0048302	BP	regulation of isotype switching to IgG isotypes	2/482	13/21090	0.0344198	0.592388
2	GO:1905331	BP	negative regulation of morphogenesis of an epithelium	2/482	13/21090	0.0344198	0.592388
2	GO:0006910	BP	phagocytosis, recognition	2/482	13/21090	0.0344198	0.592388
2	GO:0050901	BP	leukocyte tethering or rolling	2/482	13/21090	0.0344198	0.592388
2	GO:0036336	BP	dendritic cell migration	2/482	13/21090	0.0344198	0.592388
2	GO:0044130	BP	obsolete negative regulation of growth of symbiont in host	2/482	13/21090	0.0344198	0.592388
2	GO:0035458	BP	cellular response to interferon-beta	2/482	13/21090	0.0344198	0.592388
2	GO:0062149	BP	detection of stimulus involved in sensory perception of pain	2/482	13/21090	0.0344198	0.592388
2	GO:0071360	BP	cellular response to exogenous dsRNA	2/482	13/21090	0.0344198	0.592388
2	GO:1900078	BP	positive regulation of cellular response to insulin stimulus	2/482	13/21090	0.0344198	0.592388
2	GO:0035850	BP	epithelial cell differentiation involved in kidney development	2/482	13/21090	0.0344198	0.592388
2	GO:0048642	BP	negative regulation of skeletal muscle tissue development	2/482	13/21090	0.0344198	0.592388
2	GO:0042107	BP	cytokine metabolic process	2/482	13/21090	0.0344198	0.592388
2	GO:0051602	BP	response to electrical stimulus	2/482	13/21090	0.0344198	0.592388
2	GO:0002710	BP	negative regulation of T cell mediated immunity	2/482	13/21090	0.0344198	0.592388
4	GO:0046637	BP	regulation of alpha-beta T cell differentiation	4/482	54/21090	0.0347447	0.597466
29	GO:0006629	BP	lipid metabolic process	29/482	861/21090	0.0355719	0.610118
7	GO:0001763	BP	morphogenesis of a branching structure	7/482	135/21090	0.0356624	0.611146
3	GO:0002823	BP	negative regulation of adaptive immune response based on somatic recombination of immune receptors built from immunoglobulin superfamily domains	3/482	32/21090	0.0360473	0.615109
3	GO:0099587	BP	inorganic ion import across plasma membrane	3/482	32/21090	0.0360473	0.615109
3	GO:0098659	BP	inorganic cation import across plasma membrane	3/482	32/21090	0.0360473	0.615109
6	GO:0071805	BP	potassium ion transmembrane transport	6/482	107/21090	0.0362171	0.617481
5	GO:0002573	BP	myeloid leukocyte differentiation	5/482	80/21090	0.0363185	0.618681
4	GO:0051702	BP	interaction with symbiont	4/482	55/21090	0.0368178	0.62506
4	GO:0043331	BP	response to dsRNA	4/482	55/21090	0.0368178	0.62506
13	GO:0097435	BP	supramolecular fiber organization	13/482	318/21090	0.0371218	0.629686
27	GO:0060548	BP	negative regulation of cell death	27/482	792/21090	0.0383947	0.649875
3	GO:0048286	BP	lung alveolus development	3/482	33/21090	0.0389997	0.649875
3	GO:0010524	BP	positive regulation of calcium ion transport into cytosol	3/482	33/21090	0.0389997	0.649875
3	GO:2000404	BP	regulation of T cell migration	3/482	33/21090	0.0389997	0.649875
3	GO:0002704	BP	negative regulation of leukocyte mediated immunity	3/482	33/21090	0.0389997	0.649875
3	GO:0071320	BP	cellular response to cAMP	3/482	33/21090	0.0389997	0.649875
3	GO:0045428	BP	regulation of nitric oxide biosynthetic process	3/482	33/21090	0.0389997	0.649875
3	GO:0045191	BP	regulation of isotype switching	3/482	33/21090	0.0389997	0.649875
9	GO:0070302	BP	regulation of stress-activated protein kinase signaling cascade	9/482	183/21090	0.0394597	0.649875
2	GO:0002313	BP	mature B cell differentiation involved in immune response	2/482	14/21090	0.03956	0.649875
2	GO:0051044	BP	positive regulation of membrane protein ectodomain proteolysis	2/482	14/21090	0.03956	0.649875
2	GO:0032674	BP	regulation of interleukin-5 production	2/482	14/21090	0.03956	0.649875
2	GO:0006491	BP	N-glycan processing	2/482	14/21090	0.03956	0.649875
2	GO:0002689	BP	negative regulation of leukocyte chemotaxis	2/482	14/21090	0.03956	0.649875
2	GO:0030574	BP	collagen catabolic process	2/482	14/21090	0.03956	0.649875
2	GO:0061756	BP	leukocyte adhesion to vascular endothelial cell	2/482	14/21090	0.03956	0.649875
2	GO:0030049	BP	muscle filament sliding	2/482	14/21090	0.03956	0.649875
2	GO:0035967	BP	cellular response to topologically incorrect protein	2/482	14/21090	0.03956	0.649875
2	GO:0033275	BP	actin-myosin filament sliding	2/482	14/21090	0.03956	0.649875
2	GO:0060707	BP	trophoblast giant cell differentiation	2/482	14/21090	0.03956	0.649875
43	GO:0019220	BP	regulation of phosphate metabolic process	43/482	1390/21090	0.0409056	0.649875
43	GO:0051174	BP	regulation of phosphorus metabolic process	43/482	1391/21090	0.0410434	0.649875
4	GO:0071346	BP	cellular response to interferon-gamma	4/482	57/21090	0.0411734	0.649875
5	GO:0051153	BP	regulation of striated muscle cell differentiation	5/482	83/21090	0.0415381	0.649875
3	GO:0051899	BP	membrane depolarization	3/482	34/21090	0.042071	0.649875
3	GO:0007249	BP	I-kappaB kinase/NF-kappaB signaling	3/482	34/21090	0.042071	0.649875
3	GO:0010828	BP	positive regulation of glucose transmembrane transport	3/482	34/21090	0.042071	0.649875
3	GO:0086091	BP	regulation of heart rate by cardiac conduction	3/482	34/21090	0.042071	0.649875
25	GO:0009628	BP	response to abiotic stimulus	25/482	728/21090	0.0423982	0.649875
5	GO:0014013	BP	regulation of gliogenesis	5/482	84/21090	0.0433734	0.649875
5	GO:0045639	BP	positive regulation of myeloid cell differentiation	5/482	84/21090	0.0433734	0.649875
4	GO:1900182	BP	positive regulation of protein localization to nucleus	4/482	58/21090	0.043456	0.649875
6	GO:0046890	BP	regulation of lipid biosynthetic process	6/482	112/21090	0.043685	0.649875
2	GO:0030449	BP	regulation of complement activation	2/482	15/21090	0.0449695	0.649875
2	GO:0010829	BP	negative regulation of glucose transmembrane transport	2/482	15/21090	0.0449695	0.649875
2	GO:0002643	BP	regulation of tolerance induction	2/482	15/21090	0.0449695	0.649875
2	GO:0016064	BP	immunoglobulin mediated immune response	2/482	15/21090	0.0449695	0.649875
2	GO:0071711	BP	basement membrane organization	2/482	15/21090	0.0449695	0.649875
2	GO:0033627	BP	cell adhesion mediated by integrin	2/482	15/21090	0.0449695	0.649875
2	GO:0008631	BP	intrinsic apoptotic signaling pathway in response to oxidative stress	2/482	15/21090	0.0449695	0.649875
1	GO:1902214	BP	regulation of interleukin-4-mediated signaling pathway	1/482	2/21090	0.0451876	0.649875
1	GO:0055005	BP	ventricular cardiac myofibril assembly	1/482	2/21090	0.0451876	0.649875
1	GO:0042095	BP	interferon-gamma biosynthetic process	1/482	2/21090	0.0451876	0.649875
1	GO:0098703	BP	calcium ion import across plasma membrane	1/482	2/21090	0.0451876	0.649875
1	GO:1901582	BP	positive regulation of telomeric RNA transcription from RNA pol II promoter	1/482	2/21090	0.0451876	0.649875
1	GO:1901580	BP	regulation of telomeric RNA transcription from RNA pol II promoter	1/482	2/21090	0.0451876	0.649875
1	GO:1901581	BP	negative regulation of telomeric RNA transcription from RNA pol II promoter	1/482	2/21090	0.0451876	0.649875
1	GO:0046671	BP	negative regulation of retinal cell programmed cell death	1/482	2/21090	0.0451876	0.649875
1	GO:0006649	BP	phospholipid transfer to membrane	1/482	2/21090	0.0451876	0.649875
1	GO:0002317	BP	plasma cell differentiation	1/482	2/21090	0.0451876	0.649875
1	GO:0070560	BP	protein secretion by platelet	1/482	2/21090	0.0451876	0.649875
1	GO:0034157	BP	positive regulation of toll-like receptor 7 signaling pathway	1/482	2/21090	0.0451876	0.649875
1	GO:0034155	BP	regulation of toll-like receptor 7 signaling pathway	1/482	2/21090	0.0451876	0.649875
1	GO:0048073	BP	regulation of eye pigmentation	1/482	2/21090	0.0451876	0.649875
1	GO:0090076	BP	relaxation of skeletal muscle	1/482	2/21090	0.0451876	0.649875
1	GO:0070961	BP	positive regulation of neutrophil mediated killing of symbiont cell	1/482	2/21090	0.0451876	0.649875
1	GO:2000502	BP	negative regulation of natural killer cell chemotaxis	1/482	2/21090	0.0451876	0.649875
1	GO:1905098	BP	negative regulation of guanyl-nucleotide exchange factor activity	1/482	2/21090	0.0451876	0.649875
1	GO:0060309	BP	elastin catabolic process	1/482	2/21090	0.0451876	0.649875
1	GO:1905371	BP	ceramide phosphoethanolamine metabolic process	1/482	2/21090	0.0451876	0.649875
1	GO:1905373	BP	ceramide phosphoethanolamine biosynthetic process	1/482	2/21090	0.0451876	0.649875
1	GO:0001845	BP	phagolysosome assembly	1/482	2/21090	0.0451876	0.649875
1	GO:0046013	BP	regulation of T cell homeostatic proliferation	1/482	2/21090	0.0451876	0.649875
1	GO:2000977	BP	regulation of forebrain neuron differentiation	1/482	2/21090	0.0451876	0.649875
1	GO:0072236	BP	metanephric loop of Henle development	1/482	2/21090	0.0451876	0.649875
1	GO:0034342	BP	response to type III interferon	1/482	2/21090	0.0451876	0.649875
1	GO:0002660	BP	positive regulation of peripheral tolerance induction	1/482	2/21090	0.0451876	0.649875
1	GO:0036269	BP	swimming behavior	1/482	2/21090	0.0451876	0.649875
1	GO:0001805	BP	positive regulation of type III hypersensitivity	1/482	2/21090	0.0451876	0.649875
1	GO:0001803	BP	regulation of type III hypersensitivity	1/482	2/21090	0.0451876	0.649875
1	GO:1904997	BP	regulation of leukocyte adhesion to arterial endothelial cell	1/482	2/21090	0.0451876	0.649875
1	GO:0008653	BP	lipopolysaccharide metabolic process	1/482	2/21090	0.0451876	0.649875
1	GO:0032752	BP	positive regulation of interleukin-3 production	1/482	2/21090	0.0451876	0.649875
1	GO:0033082	BP	regulation of extrathymic T cell differentiation	1/482	2/21090	0.0451876	0.649875
1	GO:0002842	BP	positive regulation of T cell mediated immune response to tumor cell	1/482	2/21090	0.0451876	0.649875
1	GO:1903436	BP	regulation of mitotic cytokinetic process	1/482	2/21090	0.0451876	0.649875
1	GO:1903438	BP	positive regulation of mitotic cytokinetic process	1/482	2/21090	0.0451876	0.649875
1	GO:1904204	BP	regulation of skeletal muscle hypertrophy	1/482	2/21090	0.0451876	0.649875
1	GO:0002658	BP	regulation of peripheral tolerance induction	1/482	2/21090	0.0451876	0.649875
1	GO:0072108	BP	positive regulation of mesenchymal to epithelial transition involved in metanephros morphogenesis	1/482	2/21090	0.0451876	0.649875
1	GO:0039529	BP	RIG-I signaling pathway	1/482	2/21090	0.0451876	0.649875
1	GO:0007525	BP	somatic muscle development	1/482	2/21090	0.0451876	0.649875
1	GO:0003050	BP	regulation of systemic arterial blood pressure by atrial natriuretic peptide	1/482	2/21090	0.0451876	0.649875
1	GO:0061033	BP	secretion by lung epithelial cell involved in lung growth	1/482	2/21090	0.0451876	0.649875
1	GO:0006788	BP	heme oxidation	1/482	2/21090	0.0451876	0.649875
1	GO:1904170	BP	regulation of bleb assembly	1/482	2/21090	0.0451876	0.649875
1	GO:1904172	BP	positive regulation of bleb assembly	1/482	2/21090	0.0451876	0.649875
1	GO:2000224	BP	regulation of testosterone biosynthetic process	1/482	2/21090	0.0451876	0.649875
1	GO:2000225	BP	negative regulation of testosterone biosynthetic process	1/482	2/21090	0.0451876	0.649875
1	GO:0001810	BP	regulation of type I hypersensitivity	1/482	2/21090	0.0451876	0.649875
1	GO:0010269	BP	response to selenium ion	1/482	2/21090	0.0451876	0.649875
1	GO:1901666	BP	positive regulation of NAD+ ADP-ribosyltransferase activity	1/482	2/21090	0.0451876	0.649875
1	GO:1901664	BP	regulation of NAD+ ADP-ribosyltransferase activity	1/482	2/21090	0.0451876	0.649875
1	GO:0097325	BP	melanocyte proliferation	1/482	2/21090	0.0451876	0.649875
1	GO:1905402	BP	regulation of activated CD8-positive, alpha-beta T cell apoptotic process	1/482	2/21090	0.0451876	0.649875
1	GO:1901740	BP	negative regulation of myoblast fusion	1/482	2/21090	0.0451876	0.649875
1	GO:1900154	BP	regulation of bone trabecula formation	1/482	2/21090	0.0451876	0.649875
1	GO:1900155	BP	negative regulation of bone trabecula formation	1/482	2/21090	0.0451876	0.649875
1	GO:0034769	BP	basement membrane disassembly	1/482	2/21090	0.0451876	0.649875
1	GO:0071307	BP	cellular response to vitamin K	1/482	2/21090	0.0451876	0.649875
1	GO:2001183	BP	negative regulation of interleukin-12 secretion	1/482	2/21090	0.0451876	0.649875
1	GO:0002930	BP	trabecular meshwork development	1/482	2/21090	0.0451876	0.649875
1	GO:0034395	BP	regulation of transcription from RNA polymerase II promoter in response to iron	1/482	2/21090	0.0451876	0.649875
1	GO:1905907	BP	negative regulation of amyloid fibril formation	1/482	2/21090	0.0451876	0.649875
1	GO:0045399	BP	regulation of interleukin-3 biosynthetic process	1/482	2/21090	0.0451876	0.649875
1	GO:0072053	BP	renal inner medulla development	1/482	2/21090	0.0451876	0.649875
1	GO:0072054	BP	renal outer medulla development	1/482	2/21090	0.0451876	0.649875
1	GO:0035609	BP	C-terminal protein deglutamylation	1/482	2/21090	0.0451876	0.649875
1	GO:0106014	BP	regulation of inflammatory response to wounding	1/482	2/21090	0.0451876	0.649875
1	GO:0106015	BP	negative regulation of inflammatory response to wounding	1/482	2/21090	0.0451876	0.649875
1	GO:0045404	BP	positive regulation of interleukin-4 biosynthetic process	1/482	2/21090	0.0451876	0.649875
1	GO:2000552	BP	negative regulation of T-helper 2 cell cytokine production	1/482	2/21090	0.0451876	0.649875
1	GO:1903490	BP	positive regulation of mitotic cytokinesis	1/482	2/21090	0.0451876	0.649875
1	GO:0002524	BP	hypersensitivity	1/482	2/21090	0.0451876	0.649875
1	GO:0071642	BP	positive regulation of macrophage inflammatory protein 1 alpha production	1/482	2/21090	0.0451876	0.649875
1	GO:0045082	BP	positive regulation of interleukin-10 biosynthetic process	1/482	2/21090	0.0451876	0.649875
1	GO:0002654	BP	positive regulation of tolerance induction dependent upon immune response	1/482	2/21090	0.0451876	0.649875
1	GO:0090618	BP	DNA clamp unloading	1/482	2/21090	0.0451876	0.649875
1	GO:0001812	BP	positive regulation of type I hypersensitivity	1/482	2/21090	0.0451876	0.649875
1	GO:0060849	BP	regulation of transcription involved in lymphatic endothelial cell fate commitment	1/482	2/21090	0.0451876	0.649875
1	GO:0002876	BP	positive regulation of chronic inflammatory response to antigenic stimulus	1/482	2/21090	0.0451876	0.649875
1	GO:0086100	BP	endothelin receptor signaling pathway	1/482	2/21090	0.0451876	0.649875
1	GO:2000252	BP	negative regulation of feeding behavior	1/482	2/21090	0.0451876	0.649875
1	GO:0010430	BP	fatty acid omega-oxidation	1/482	2/21090	0.0451876	0.649875
1	GO:0014052	BP	regulation of gamma-aminobutyric acid secretion	1/482	2/21090	0.0451876	0.649875
1	GO:1903615	BP	positive regulation of protein tyrosine phosphatase activity	1/482	2/21090	0.0451876	0.649875
1	GO:0140014	BP	mitotic nuclear division	1/482	2/21090	0.0451876	0.649875
1	GO:0061511	BP	centriole elongation	1/482	2/21090	0.0451876	0.649875
1	GO:1905451	BP	positive regulation of Fc-gamma receptor signaling pathway involved in phagocytosis	1/482	2/21090	0.0451876	0.649875
1	GO:1905458	BP	positive regulation of lymphoid progenitor cell differentiation	1/482	2/21090	0.0451876	0.649875
1	GO:0070960	BP	positive regulation of neutrophil mediated cytotoxicity	1/482	2/21090	0.0451876	0.649875
1	GO:2000471	BP	regulation of hematopoietic stem cell migration	1/482	2/21090	0.0451876	0.649875
1	GO:2000473	BP	positive regulation of hematopoietic stem cell migration	1/482	2/21090	0.0451876	0.649875
1	GO:1902524	BP	positive regulation of protein K48-linked ubiquitination	1/482	2/21090	0.0451876	0.649875
1	GO:0003366	BP	cell-matrix adhesion involved in ameboidal cell migration	1/482	2/21090	0.0451876	0.649875
1	GO:1904833	BP	positive regulation of removal of superoxide radicals	1/482	2/21090	0.0451876	0.649875
1	GO:0034127	BP	regulation of MyD88-independent toll-like receptor signaling pathway	1/482	2/21090	0.0451876	0.649875
1	GO:0072092	BP	ureteric bud invasion	1/482	2/21090	0.0451876	0.649875
1	GO:0070949	BP	regulation of neutrophil mediated killing of symbiont cell	1/482	2/21090	0.0451876	0.649875
1	GO:0032218	BP	riboflavin transport	1/482	2/21090	0.0451876	0.649875
1	GO:2000458	BP	regulation of astrocyte chemotaxis	1/482	2/21090	0.0451876	0.649875
1	GO:1901671	BP	positive regulation of superoxide dismutase activity	1/482	2/21090	0.0451876	0.649875
1	GO:0045401	BP	positive regulation of interleukin-3 biosynthetic process	1/482	2/21090	0.0451876	0.649875
1	GO:0035120	BP	post-embryonic appendage morphogenesis	1/482	2/21090	0.0451876	0.649875
1	GO:0035127	BP	post-embryonic limb morphogenesis	1/482	2/21090	0.0451876	0.649875
1	GO:0035128	BP	post-embryonic forelimb morphogenesis	1/482	2/21090	0.0451876	0.649875
1	GO:0051025	BP	negative regulation of immunoglobulin secretion	1/482	2/21090	0.0451876	0.649875
1	GO:0071502	BP	cellular response to temperature stimulus	1/482	2/21090	0.0451876	0.649875
1	GO:0045425	BP	positive regulation of granulocyte macrophage colony-stimulating factor biosynthetic process	1/482	2/21090	0.0451876	0.649875
1	GO:0043132	BP	NAD transport	1/482	2/21090	0.0451876	0.649875
5	GO:0062013	BP	positive regulation of small molecule metabolic process	5/482	85/21090	0.0452568	0.649875
3	GO:0031952	BP	regulation of protein autophosphorylation	3/482	35/21090	0.0452601	0.649875
3	GO:0032715	BP	negative regulation of interleukin-6 production	3/482	35/21090	0.0452601	0.649875
4	GO:0001508	BP	action potential	4/482	59/21090	0.0458084	0.657276
62	GO:0032268	BP	regulation of cellular protein metabolic process	62/482	2125/21090	0.0461368	0.661514
4	GO:1905954	BP	positive regulation of lipid localization	4/482	60/21090	0.0482304	0.69005
4	GO:1902117	BP	positive regulation of organelle assembly	4/482	60/21090	0.0482304	0.69005
3	GO:0002312	BP	B cell activation involved in immune response	3/482	36/21090	0.0485655	0.693852
26	GO:0006468	BP	protein phosphorylation	26/482	773/21090	0.0487265	0.695656
7	GO:0006643	BP	membrane lipid metabolic process	7/482	145/21090	0.0492081	0.701531
21	GO:0009897	CC	external side of plasma membrane	21/482	180/21090	8.79e-07	0.000429151
22	GO:0098552	CC	side of membrane	22/482	248/21090	1.21e-06	0.000460074
42	GO:0005615	CC	extracellular space	42/482	925/21090	2.39e-05	0.00325
39	GO:0005576	CC	extracellular region	39/482	899/21090	0.000135507	0.0129157
35	GO:0031226	CC	intrinsic component of plasma membrane	35/482	799/21090	0.000244042	0.0203531
13	GO:0045121	CC	membrane raft	13/482	193/21090	0.000520075	0.036228
13	GO:0098857	CC	membrane microdomain	13/482	194/21090	0.000546108	0.0373068
13	GO:0098589	CC	membrane region	13/482	199/21090	0.000693421	0.0440619
31	GO:0005887	CC	integral component of plasma membrane	31/482	739/21090	0.00148274	0.0797809
153	GO:0031224	CC	intrinsic component of membrane	153/482	5466/21090	0.00379112	0.154234
4	GO:0051233	CC	spindle midzone	4/482	29/21090	0.00406796	0.162523
2	GO:0072559	CC	NLRP3 inflammasome complex	2/482	5/21090	0.00497938	0.184911
2	GO:0097427	CC	microtubule bundle	2/482	5/21090	0.00497938	0.184911
2	GO:0071438	CC	invadopodium membrane	2/482	5/21090	0.00497938	0.184911
5	GO:0030175	CC	filopodium	5/482	49/21090	0.00509242	0.186999
15	GO:0031012	CC	extracellular matrix	15/482	308/21090	0.00584956	0.208336
150	GO:0016021	CC	integral component of membrane	150/482	5388/21090	0.00593531	0.210267
2	GO:0046581	CC	intercellular canaliculus	2/482	6/21090	0.00735638	0.241782
6	GO:0030018	CC	Z disc	6/482	76/21090	0.00784584	0.252886
7	GO:0098858	CC	actin-based cell projection	7/482	107/21090	0.0114693	0.333676
3	GO:0097431	CC	mitotic spindle pole	3/482	21/21090	0.0116173	0.335084
18	GO:0009986	CC	cell surface	18/482	419/21090	0.0116181	0.335084
84	GO:0005886	CC	plasma membrane	84/482	2839/21090	0.0123416	0.353871
7	GO:0030139	CC	endocytic vesicle	7/482	111/21090	0.0138337	0.37879
4	GO:0043292	CC	contractile fiber	4/482	41/21090	0.0139985	0.381736
2	GO:0061702	CC	inflammasome complex	2/482	9/21090	0.0168711	0.43128
1	GO:0110070	CC	cellularization cleavage furrow	1/482	1/21090	0.0228544	0.449808
1	GO:0005969	CC	serine-pyruvate aminotransferase complex	1/482	1/21090	0.0228544	0.449808
1	GO:0098683	CC	cochlear hair cell ribbon synapse	1/482	1/21090	0.0228544	0.449808
1	GO:0045323	CC	interleukin-1 receptor complex	1/482	1/21090	0.0228544	0.449808
1	GO:0071752	CC	secretory dimeric IgA immunoglobulin complex	1/482	1/21090	0.0228544	0.449808
1	GO:0071753	CC	IgM immunoglobulin complex	1/482	1/21090	0.0228544	0.449808
1	GO:0071750	CC	dimeric IgA immunoglobulin complex	1/482	1/21090	0.0228544	0.449808
1	GO:0071751	CC	secretory IgA immunoglobulin complex	1/482	1/21090	0.0228544	0.449808
1	GO:0071756	CC	pentameric IgM immunoglobulin complex	1/482	1/21090	0.0228544	0.449808
1	GO:0071754	CC	IgM immunoglobulin complex, circulating	1/482	1/21090	0.0228544	0.449808
1	GO:0005585	CC	collagen type II trimer	1/482	1/21090	0.0228544	0.449808
1	GO:0042571	CC	immunoglobulin complex, circulating	1/482	1/21090	0.0228544	0.449808
1	GO:0071749	CC	polymeric IgA immunoglobulin complex	1/482	1/21090	0.0228544	0.449808
1	GO:0071748	CC	monomeric IgA immunoglobulin complex	1/482	1/21090	0.0228544	0.449808
1	GO:0071745	CC	IgA immunoglobulin complex	1/482	1/21090	0.0228544	0.449808
1	GO:0071746	CC	IgA immunoglobulin complex, circulating	1/482	1/21090	0.0228544	0.449808
1	GO:0044317	CC	rod spherule	1/482	1/21090	0.0228544	0.449808
2	GO:0032421	CC	stereocilium bundle	2/482	11/21090	0.0250101	0.473799
2	GO:1990023	CC	mitotic spindle midzone	2/482	11/21090	0.0250101	0.473799
2	GO:0045178	CC	basal part of cell	2/482	12/21090	0.0295645	0.530254
2	GO:0031258	CC	lamellipodium membrane	2/482	13/21090	0.0344198	0.592388
3	GO:0098636	CC	protein complex involved in cell adhesion	3/482	33/21090	0.0389997	0.649875
105	GO:0005737	CC	cytoplasm	105/482	3836/21090	0.042141	0.649875
1	GO:0070743	CC	interleukin-23 complex	1/482	2/21090	0.0451876	0.649875
1	GO:0099115	CC	chromosome, subtelomeric region	1/482	2/21090	0.0451876	0.649875
1	GO:0097169	CC	AIM2 inflammasome complex	1/482	2/21090	0.0451876	0.649875
1	GO:1902560	CC	GMP reductase complex	1/482	2/21090	0.0451876	0.649875
1	GO:0034669	CC	integrin alpha4-beta7 complex	1/482	2/21090	0.0451876	0.649875
1	GO:0034666	CC	integrin alpha2-beta1 complex	1/482	2/21090	0.0451876	0.649875
1	GO:0043514	CC	interleukin-12 complex	1/482	2/21090	0.0451876	0.649875
1	GO:1990707	CC	nuclear subtelomeric heterochromatin	1/482	2/21090	0.0451876	0.649875
1	GO:1902937	CC	inward rectifier potassium channel complex	1/482	2/21090	0.0451876	0.649875
90	GO:0097367	MF	carbohydrate derivative binding	90/482	2244/21090	2.96e-06	0.0006734
17	GO:0005125	MF	cytokine activity	17/482	201/21090	4.02e-06	0.000812155
6	GO:0001614	MF	purinergic nucleotide receptor activity	6/482	21/21090	5.6e-06	0.00102818
6	GO:0016502	MF	nucleotide receptor activity	6/482	21/21090	5.6e-06	0.00102818
5	GO:0045028	MF	G protein-coupled purinergic nucleotide receptor activity	5/482	13/21090	6.75e-06	0.00116986
99	GO:0043168	MF	anion binding	99/482	2766/21090	7.99e-06	0.00134446
11	GO:0140375	MF	immune receptor activity	11/482	93/21090	8.94e-06	0.00145509
171	GO:0043167	MF	ion binding	171/482	5569/21090	1.05e-05	0.0016711
3	GO:0001730	MF	2'-5'-oligoadenylate synthetase activity	3/482	3/21090	1.19e-05	0.00185014
5	GO:0019865	MF	immunoglobulin binding	5/482	15/21090	1.52e-05	0.00226665
9	GO:0003725	MF	double-stranded RNA binding	9/482	66/21090	1.84e-05	0.00266843
75	GO:0017076	MF	purine nucleotide binding	75/482	2013/21090	2.79e-05	0.00367361
74	GO:0032555	MF	purine ribonucleotide binding	74/482	2001/21090	3.76e-05	0.00467991
18	GO:0005126	MF	cytokine receptor binding	18/482	263/21090	3.83e-05	0.00473684
25	GO:0030545	MF	receptor regulator activity	25/482	447/21090	4.05e-05	0.00491292
72	GO:0035639	MF	purine ribonucleoside triphosphate binding	72/482	1936/21090	4.07e-05	0.00491292
74	GO:0032553	MF	ribonucleotide binding	74/482	2017/21090	4.16e-05	0.00496123
24	GO:0048018	MF	receptor ligand activity	24/482	421/21090	4.27e-05	0.00505371
57	GO:0042802	MF	identical protein binding	57/482	1445/21090	5.22e-05	0.00587423
24	GO:0030546	MF	signaling receptor activator activity	24/482	429/21090	5.74e-05	0.00629953
3	GO:0019864	MF	IgG binding	3/482	6/21090	0.000225389	0.0189554
22	GO:0005525	MF	GTP binding	22/482	420/21090	0.000347263	0.0268372
22	GO:0032550	MF	purine ribonucleoside binding	22/482	428/21090	0.000423852	0.0314216
22	GO:0001883	MF	purine nucleoside binding	22/482	429/21090	0.00043497	0.0320086
22	GO:0032549	MF	ribonucleoside binding	22/482	431/21090	0.000458311	0.0333584
22	GO:0001882	MF	nucleoside binding	22/482	435/21090	0.000509635	0.0360454
88	GO:0016787	MF	hydrolase activity	88/482	2700/21090	0.000538586	0.0370459
22	GO:0032561	MF	guanyl ribonucleotide binding	22/482	441/21090	0.000599207	0.0401128
5	GO:0043394	MF	proteoglycan binding	5/482	32/21090	0.000738586	0.0459116
49	GO:0005102	MF	signaling receptor binding	49/482	1320/21090	0.00080522	0.0495916
11	GO:0005539	MF	glycosaminoglycan binding	11/482	155/21090	0.000895722	0.0543807
22	GO:0019001	MF	guanyl nucleotide binding	22/482	443/21090	0.000970731	0.0580005
4	GO:0061783	MF	peptidoglycan muralytic activity	4/482	20/21090	0.000975942	0.0581382
3	GO:0034483	MF	heparan sulfate sulfotransferase activity	3/482	10/21090	0.00126295	0.07022
4	GO:0019956	MF	chemokine binding	4/482	22/21090	0.00142117	0.0766745
8	GO:0019955	MF	cytokine binding	8/482	95/21090	0.00150279	0.0800676
13	GO:0030246	MF	carbohydrate binding	13/482	223/21090	0.00194825	0.0965252
80	GO:1901265	MF	nucleoside phosphate binding	80/482	2509/21090	0.00212896	0.10343
80	GO:0000166	MF	nucleotide binding	80/482	2509/21090	0.00212896	0.10343
3	GO:0005149	MF	interleukin-1 receptor binding	3/482	12/21090	0.00223785	0.106396
7	GO:0004896	MF	cytokine receptor activity	7/482	82/21090	0.00271097	0.124456
3	GO:0038187	MF	pattern recognition receptor activity	3/482	13/21090	0.00286014	0.12836
5	GO:0008009	MF	chemokine activity	5/482	43/21090	0.00287419	0.128702
2	GO:0004768	MF	stearoyl-CoA 9-desaturase activity	2/482	4/21090	0.00303349	0.131141
2	GO:0016215	MF	acyl-CoA desaturase activity	2/482	4/21090	0.00303349	0.131141
2	GO:0097677	MF	STAT family protein binding	2/482	4/21090	0.00303349	0.131141
2	GO:0008467	MF	[heparan sulfate]-glucosamine 3-sulfotransferase 1 activity	2/482	4/21090	0.00303349	0.131141
52	GO:0098772	MF	molecular function regulator	52/482	1513/21090	0.00309882	0.133359
4	GO:0005164	MF	tumor necrosis factor receptor binding	4/482	28/21090	0.00357042	0.147094
7	GO:0038024	MF	cargo receptor activity	7/482	91/21090	0.00484742	0.184911
8	GO:0008201	MF	heparin binding	8/482	115/21090	0.00493375	0.184911
2	GO:0019763	MF	immunoglobulin receptor activity	2/482	5/21090	0.00497938	0.184911
5	GO:0042379	MF	chemokine receptor binding	5/482	49/21090	0.00509242	0.186999
8	GO:0070851	MF	growth factor receptor binding	8/482	116/21090	0.00519631	0.189905
3	GO:0003796	MF	lysozyme activity	3/482	16/21090	0.00532237	0.192645
86	GO:0036094	MF	small molecule binding	86/482	2836/21090	0.00554363	0.19993
53	GO:0030554	MF	adenyl nucleotide binding	53/482	1606/21090	0.00687351	0.23398
32	GO:0016462	MF	pyrophosphatase activity	32/482	861/21090	0.00700726	0.238128
5	GO:0008146	MF	sulfotransferase activity	5/482	53/21090	0.00711578	0.240997
32	GO:0016818	MF	hydrolase activity, acting on acid anhydrides, in phosphorus-containing anhydrides	32/482	864/21090	0.0071762	0.241782
32	GO:0016817	MF	hydrolase activity, acting on acid anhydrides	32/482	865/21090	0.0072358	0.241782
3	GO:0005212	MF	structural constituent of eye lens	3/482	18/21090	0.00749748	0.242048
344	GO:0005488	MF	binding	344/482	13875/21090	0.00870765	0.274476
21	GO:0004175	MF	endopeptidase activity	21/482	503/21090	0.00908285	0.283181
4	GO:0032813	MF	tumor necrosis factor receptor superfamily binding	4/482	37/21090	0.00980314	0.301413
27	GO:0070011	MF	peptidase activity, acting on L-amino acid peptides	27/482	710/21090	0.00997322	0.302592
10	GO:1901681	MF	sulfur compound binding	10/482	185/21090	0.0103296	0.307674
30	GO:0017111	MF	nucleoside-triphosphatase activity	30/482	809/21090	0.0109808	0.321334
52	GO:0032559	MF	adenyl ribonucleotide binding	52/482	1596/21090	0.0111519	0.324916
28	GO:0008233	MF	peptidase activity	28/482	756/21090	0.0124882	0.355845
50	GO:0005524	MF	ATP binding	50/482	1540/21090	0.0127553	0.362656
2	GO:0086008	MF	voltage-gated potassium channel activity involved in cardiac muscle cell action potential repolarization	2/482	8/21090	0.0133218	0.366277
2	GO:0016717	MF	oxidoreductase activity, acting on paired donors, with oxidation of a pair of donors resulting in the reduction of molecular oxygen to two molecules of water	2/482	8/21090	0.0133218	0.366277
2	GO:0008574	MF	ATP-dependent microtubule motor activity, plus-end-directed	2/482	8/21090	0.0133218	0.366277
4	GO:0004177	MF	aminopeptidase activity	4/482	42/21090	0.0151996	0.40837
6	GO:0005178	MF	integrin binding	6/482	88/21090	0.0155035	0.414863
2	GO:0042834	MF	peptidoglycan binding	2/482	9/21090	0.0168711	0.43128
14	GO:0003924	MF	GTPase activity	14/482	307/21090	0.0179841	0.449808
6	GO:0008238	MF	exopeptidase activity	6/482	91/21090	0.0180222	0.449808
3	GO:0001637	MF	G protein-coupled chemoattractant receptor activity	3/482	25/21090	0.018785	0.449808
3	GO:0004950	MF	chemokine receptor activity	3/482	25/21090	0.018785	0.449808
4	GO:0032934	MF	sterol binding	4/482	45/21090	0.0191848	0.449808
2	GO:0000774	MF	adenyl-nucleotide exchange factor activity	2/482	10/21090	0.0207732	0.449808
2	GO:0016813	MF	hydrolase activity, acting on carbon-nitrogen (but not peptide) bonds, in linear amidines	2/482	10/21090	0.0207732	0.449808
2	GO:0008239	MF	dipeptidyl-peptidase activity	2/482	10/21090	0.0207732	0.449808
26	GO:0042803	MF	protein homodimerization activity	26/482	716/21090	0.0209659	0.449808
1	GO:0033862	MF	UMP kinase activity	1/482	1/21090	0.0228544	0.449808
1	GO:0001135	MF	obsolete RNA polymerase II transcription regulator recruiting activity	1/482	1/21090	0.0228544	0.449808
1	GO:0004876	MF	complement component C3a receptor activity	1/482	1/21090	0.0228544	0.449808
1	GO:0016872	MF	intramolecular lyase activity	1/482	1/21090	0.0228544	0.449808
1	GO:0004394	MF	heparan sulfate 2-O-sulfotransferase activity	1/482	1/21090	0.0228544	0.449808
1	GO:0045515	MF	interleukin-18 receptor binding	1/482	1/21090	0.0228544	0.449808
1	GO:0070463	MF	tubulin-dependent ATPase activity	1/482	1/21090	0.0228544	0.449808
1	GO:0033871	MF	[heparan sulfate]-glucosamine 3-sulfotransferase 2 activity	1/482	1/21090	0.0228544	0.449808
1	GO:0015386	MF	potassium:proton antiporter activity	1/482	1/21090	0.0228544	0.449808
1	GO:0005252	MF	open rectifier potassium channel activity	1/482	1/21090	0.0228544	0.449808
1	GO:0030226	MF	apolipoprotein receptor activity	1/482	1/21090	0.0228544	0.449808
1	GO:0042131	MF	thiamine phosphate phosphatase activity	1/482	1/21090	0.0228544	0.449808
1	GO:0072570	MF	ADP-D-ribose binding	1/482	1/21090	0.0228544	0.449808
1	GO:0019807	MF	aspartoacylase activity	1/482	1/21090	0.0228544	0.449808
1	GO:0090556	MF	phosphatidylserine floppase activity	1/482	1/21090	0.0228544	0.449808
1	GO:0034188	MF	apolipoprotein A-I receptor activity	1/482	1/21090	0.0228544	0.449808
1	GO:0017020	MF	myosin phosphatase regulator activity	1/482	1/21090	0.0228544	0.449808
1	GO:0032394	MF	MHC class Ib receptor activity	1/482	1/21090	0.0228544	0.449808
1	GO:0045029	MF	G protein-coupled UDP receptor activity	1/482	1/21090	0.0228544	0.449808
1	GO:0052732	MF	phosphoethanolamine phosphatase activity	1/482	1/21090	0.0228544	0.449808
1	GO:0052731	MF	phosphocholine phosphatase activity	1/482	1/21090	0.0228544	0.449808
1	GO:0043250	MF	sodium-dependent organic anion transmembrane transporter activity	1/482	1/21090	0.0228544	0.449808
1	GO:1904493	MF	tetrahydrofolyl-poly(glutamate) polymer binding	1/482	1/21090	0.0228544	0.449808
1	GO:1904492	MF	Ac-Asp-Glu binding	1/482	1/21090	0.0228544	0.449808
1	GO:0050528	MF	acyloxyacyl hydrolase activity	1/482	1/21090	0.0228544	0.449808
1	GO:0004512	MF	inositol-3-phosphate synthase activity	1/482	1/21090	0.0228544	0.449808
1	GO:0008426	MF	protein kinase C inhibitor activity	1/482	1/21090	0.0228544	0.449808
1	GO:0042164	MF	interleukin-12 alpha subunit binding	1/482	1/21090	0.0228544	0.449808
1	GO:0038021	MF	leptin receptor activity	1/482	1/21090	0.0228544	0.449808
1	GO:0005146	MF	leukemia inhibitory factor receptor binding	1/482	1/21090	0.0228544	0.449808
1	GO:0019782	MF	ISG15 activating enzyme activity	1/482	1/21090	0.0228544	0.449808
4	GO:0005518	MF	collagen binding	4/482	48/21090	0.0237599	0.463074
7	GO:0008083	MF	growth factor activity	7/482	125/21090	0.0248472	0.473799
2	GO:0008253	MF	5'-nucleotidase activity	2/482	11/21090	0.0250101	0.473799
2	GO:0003993	MF	acid phosphatase activity	2/482	11/21090	0.0250101	0.473799
3	GO:0005547	MF	phosphatidylinositol-3,4,5-trisphosphate binding	3/482	28/21090	0.0254476	0.478272
5	GO:0016782	MF	transferase activity, transferring sulfur-containing groups	5/482	73/21090	0.0257797	0.482249
16	GO:0005261	MF	cation channel activity	16/482	400/21090	0.027277	0.504133
8	GO:0004222	MF	metalloendopeptidase activity	8/482	157/21090	0.0281293	0.514189
11	GO:0008237	MF	metallopeptidase activity	11/482	244/21090	0.0286513	0.523253
13	GO:0015631	MF	tubulin binding	13/482	301/21090	0.0290509	0.529323
2	GO:1990939	MF	ATP-dependent microtubule motor activity	2/482	12/21090	0.0295645	0.530254
10	GO:0035091	MF	phosphatidylinositol binding	10/482	209/21090	0.0301554	0.53796
3	GO:0070566	MF	adenylyltransferase activity	3/482	30/21090	0.0305039	0.542243
3	GO:0042056	MF	chemoattractant activity	3/482	31/21090	0.0332151	0.583187
3	GO:0060590	MF	ATPase regulator activity	3/482	31/21090	0.0332151	0.583187
3	GO:0005251	MF	delayed rectifier potassium channel activity	3/482	31/21090	0.0332151	0.583187
2	GO:0008252	MF	nucleotidase activity	2/482	13/21090	0.0344198	0.592388
2	GO:0005537	MF	mannose binding	2/482	13/21090	0.0344198	0.592388
6	GO:0005319	MF	lipid transporter activity	6/482	106/21090	0.0348294	0.598408
19	GO:0046873	MF	metal ion transmembrane transporter activity	19/482	512/21090	0.03537	0.607175
3	GO:0005080	MF	protein kinase C binding	3/482	32/21090	0.0360473	0.615109
6	GO:0099094	MF	ligand-gated cation channel activity	6/482	109/21090	0.0390978	0.649875
14	GO:0004857	MF	enzyme inhibitor activity	14/482	347/21090	0.0426077	0.649875
20	GO:0015267	MF	channel activity	20/482	558/21090	0.0437541	0.649875
20	GO:0022803	MF	passive transmembrane transporter activity	20/482	558/21090	0.0437541	0.649875
2	GO:0044548	MF	S100 protein binding	2/482	15/21090	0.0449695	0.649875
1	GO:1905056	MF	calcium-transporting ATPase activity involved in regulation of presynaptic cytosolic calcium ion concentration	1/482	2/21090	0.0451876	0.649875
1	GO:0031731	MF	CCR6 chemokine receptor binding	1/482	2/21090	0.0451876	0.649875
1	GO:0097604	MF	temperature-gated cation channel activity	1/482	2/21090	0.0451876	0.649875
1	GO:0045030	MF	G protein-coupled UTP receptor activity	1/482	2/21090	0.0451876	0.649875
1	GO:0086059	MF	voltage-gated calcium channel activity involved SA node cell action potential	1/482	2/21090	0.0451876	0.649875
1	GO:0009041	MF	uridylate kinase activity	1/482	2/21090	0.0451876	0.649875
1	GO:0004748	MF	ribonucleoside-diphosphate reductase activity, thioredoxin disulfide as acceptor	1/482	2/21090	0.0451876	0.649875
1	GO:0047023	MF	androsterone dehydrogenase activity	1/482	2/21090	0.0451876	0.649875
1	GO:0051916	MF	granulocyte colony-stimulating factor binding	1/482	2/21090	0.0451876	0.649875
1	GO:0003726	MF	double-stranded RNA adenosine deaminase activity	1/482	2/21090	0.0451876	0.649875
1	GO:0004392	MF	heme oxygenase (decyclizing) activity	1/482	2/21090	0.0451876	0.649875
1	GO:0019959	MF	interleukin-8 binding	1/482	2/21090	0.0451876	0.649875
1	GO:0019770	MF	IgG receptor activity	1/482	2/21090	0.0451876	0.649875
1	GO:0045519	MF	interleukin-23 receptor binding	1/482	2/21090	0.0451876	0.649875
1	GO:0061731	MF	ribonucleoside-diphosphate reductase activity	1/482	2/21090	0.0451876	0.649875
1	GO:0052642	MF	lysophosphatidic acid phosphatase activity	1/482	2/21090	0.0451876	0.649875
1	GO:0019862	MF	IgA binding	1/482	2/21090	0.0451876	0.649875
1	GO:0036505	MF	prosaposin receptor activity	1/482	2/21090	0.0451876	0.649875
1	GO:0071553	MF	G protein-coupled pyrimidinergic nucleotide receptor activity	1/482	2/21090	0.0451876	0.649875
1	GO:0034736	MF	cholesterol O-acyltransferase activity	1/482	2/21090	0.0451876	0.649875
1	GO:0090554	MF	phosphatidylcholine floppase activity	1/482	2/21090	0.0451876	0.649875
1	GO:0070052	MF	collagen V binding	1/482	2/21090	0.0451876	0.649875
1	GO:0008396	MF	oxysterol 7-alpha-hydroxylase activity	1/482	2/21090	0.0451876	0.649875
1	GO:0071791	MF	chemokine (C-C motif) ligand 5 binding	1/482	2/21090	0.0451876	0.649875
1	GO:0050659	MF	N-acetylgalactosamine 4-sulfate 6-O-sulfotransferase activity	1/482	2/21090	0.0451876	0.649875
1	GO:0005171	MF	hepatocyte growth factor receptor binding	1/482	2/21090	0.0451876	0.649875
1	GO:0004772	MF	sterol O-acyltransferase activity	1/482	2/21090	0.0451876	0.649875
1	GO:0060422	MF	peptidyl-dipeptidase inhibitor activity	1/482	2/21090	0.0451876	0.649875
1	GO:0003920	MF	GMP reductase activity	1/482	2/21090	0.0451876	0.649875
1	GO:0004962	MF	endothelin receptor activity	1/482	2/21090	0.0451876	0.649875
1	GO:0050692	MF	DNA binding domain binding	1/482	2/21090	0.0451876	0.649875
1	GO:0019767	MF	IgE receptor activity	1/482	2/21090	0.0451876	0.649875
1	GO:0004053	MF	arginase activity	1/482	2/21090	0.0451876	0.649875
1	GO:0047044	MF	androstan-3-alpha,17-beta-diol dehydrogenase activity	1/482	2/21090	0.0451876	0.649875
1	GO:0061860	MF	DNA clamp unloader activity	1/482	2/21090	0.0451876	0.649875
1	GO:0016728	MF	oxidoreductase activity, acting on CH or CH2 groups, disulfide as acceptor	1/482	2/21090	0.0451876	0.649875
1	GO:0016657	MF	oxidoreductase activity, acting on NAD(P)H, nitrogenous group as acceptor	1/482	2/21090	0.0451876	0.649875
1	GO:0043682	MF	copper transmembrane transporter activity, phosphorylative mechanism	1/482	2/21090	0.0451876	0.649875
1	GO:0032217	MF	riboflavin transmembrane transporter activity	1/482	2/21090	0.0451876	0.649875
1	GO:0033754	MF	indoleamine 2,3-dioxygenase activity	1/482	2/21090	0.0451876	0.649875
1	GO:0032767	MF	copper-dependent protein binding	1/482	2/21090	0.0451876	0.649875
1	GO:0023024	MF	MHC class I protein complex binding	1/482	2/21090	0.0451876	0.649875
5	GO:0051087	MF	chaperone binding	5/482	85/21090	0.0452568	0.649875
5	GO:0008081	MF	phosphoric diester hydrolase activity	5/482	87/21090	0.049168	0.701458
